# Supplementary material
Source: MDPI journal article supplement (https://www.mdpi.com/2225-1154/10/9/129)
Supplement: s1 [file s1]

# Απόψεις σχετικά με τις επιπτώσεις της κλιματικής αλλαγής στην υγεία

Τα πεδία με αστερίσκο (\*) είναι υποχρεωτικά.

## 1 Εισαγωγή

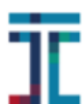

Cyprus  
University of  
Technology

Cyprus International  
Institute for Environmental  
and Public Health

Water and Health Laboratory

[You can change the language to English in the top right corner of your screen.](#)

Σας ευχαριστούμε για το ενδιαφέρον σας για την έρευνα μας!

**Τα φαινόμενα που συνοδεύουν την κλιματική αλλαγή έχουν πολλαπλές επιδράσεις στη ζωή και την υγεία μας.**

Στην Κύπρο, για παράδειγμα, τα τελευταία χρόνια παρατηρούνται καύσωνες με μεγαλύτερη συχνότητα και μεγάλες περιόδους χωρίς βροχή ειδικά το χειμώνα που επηρεάζουν άμεσα και τα αποθέματα νερού.

**Με αυτή τη μελέτη θέλουμε να μάθουμε της απόψεις των κατοίκων της Κύπρου σχετικά με τις επιπτώσεις της κλιματικής αλλαγής και περιβαλλοντικών παραγόντων στην υγεία.**

**Οι απαντήσεις σας στο σύντομο ερωτηματολόγιο που ακολουθεί (χρόνος συμπλήρωσης περίπου 10 λεπτά) θα αποτελέσουν τη βάση για να μπορέσουμε να συμπεριλάβουμε πιο αποτελεσματικά τους πολίτες, ισότιμα, με άλλους αρμόδιους φορείς σε μελλοντικές ερευνητικές προσπάθειες και να αναπτύξουμε πιο αποτελεσματικές πρωτοβουλίες επικοινωνίας με την κοινή γνώμη.**

Κατά τη συμπλήρωση του ερωτηματολογίου δεν συλλέγονται προσωπικά δεδομένα και οι απαντήσεις θα είναι ανώνυμες.

Η μελέτη διεξάγεται από το Διεθνές Ινστιτούτο Κύπρου για την Περιβαλλοντική και Δημόσια Υγεία του Τεχνολογικού Πανεπιστημίου Κύπρου σε συνεργασία με το μεταπτυχιακό πρόγραμμα Παγκόσμιας Υγείας του Πανεπιστημίου Μάαστριχτ (Ολλανδία).

[Αν συμφωνείτε να απαντήσετε το ερωτηματολόγιο, πρέπει να επιλέξετε το κουτάκι στο τέλος της σελίδας.](#)

Αν χρειάζεστε παραπάνω πληροφορίες σχετικά με τη μελέτη και τις άλλες ερευνητικές μας δραστηριότητες, μπορείτε να επικοινωνήσετε μαζί μας μέσω της ηλεκτρονικής διεύθυνσης: [waterandhealthlab@cut.ac.cy](mailto:waterandhealthlab@cut.ac.cy).

**Ευχαριστούμε πολύ!**

Eva Maloan van Bergen Henegouw  
MSc Global Health  
Maastricht University, the Netherlands

Κωνσταντίνος Χ. Μακρής, PhD  
Αναπληρωτής Καθηγητής Περιβαλλοντικής Υγείας  
Water and Health Laboratory  
Διεθνές Ινστιτούτο Κύπρου για την Περιβαλλοντική και Δημόσια Υγεία  
Τεχνολογικό Πανεπιστήμιο Κύπρου

☐ \* Έχω διαβάσει όλες τις πληροφορίες και επιθυμώ να απαντήσω το ερωτηματολόγιο.

## 2 Γενικές πληροφορίες

---

**\* 1. Ηλικία**

*Only values of at least 18 are allowed*

**\* 2. Πώς θα περιγράφατε τον τόπο γέννησής σας;**

- ☐ Μεγάλη πόλη
- ☐ Προάστιο μεγάλης πόλης
- ☐ Μικρή πόλη/Κωμόπολη
- ☐ Μη αστική περιοχή (π.χ. χωριό)

**\* 3. Φύλο**

- ☐ Γυναίκα
- ☐ Άνδρας

**\* 4. Ποιο είναι το υψηλότερο επίπεδο εκπαίδευσης που έχετε ολοκληρώσει με επιτυχία;  
Παρακαλώ περιλάβετε οποιαδήποτε εκπαίδευση πήρατε στα πλαίσια της εργασίας σας.**

- ☐ Δεν έχω φοιτήσει ποτέ σε σχολείο
- ☐ Δεν έχω τελειώσει το δημοτικό
- ☐ Δημοτικό σχολείο
- ☐ Γυμνάσιο (3 χρόνια)
- ☐ Λύκειο/Τεχνική σχολή (απολυτήριο)
- ☐ Μεταλυκειακή εκπαίδευση μη τριτοβάθμια
- ☐ Τριτοβάθμια μη Πανεπιστημιακή
- ☐ Πανεπιστήμιο (πρώτο πτυχίο)
- ☐ Πανεπιστήμιο-Μεταπτυχιακό (μόνο Master's degree)
- ☐ Διδακτορικό

**\* 5. Επαγγελματική κατάσταση**

- ☐ Εργαζόμενος
- ☐ Συνταξιούχος
- ☐ Μαθητής
- ☐ Δεν εργάζομαι
- ☐ Οικιακά

**\* 6. Σε ποια επαρχία μένετε τώρα;**

- ☐ Πάφος
- ☐ Λεμεσός
- ☐ Λευκωσία
- ☐ Αμμόχωστος
- ☐ Λάρνακα
- ☐ Άλλη περιοχή της Κύπρου
- ☐ Δεν μένω στην Κύπρο

**\* 7. Πώς θα περιγράφατε την περιοχή στην οποία μένετε;**

- ☐ Μεγάλη πόλη
- ☐ Προάστιο μεγάλης πόλης
- ☐ Μικρή πόλη/Κωμόπολη
- ☐ Μη αστική περιοχή (π.χ. χωριό)

**\* 8. Πώς θα βαθμολογούσατε την κοινότητα/περιοχή σας σαν μέρος για να ζει κάποιος;**

- ☐ Πολύ καλή
- ☐ Κάπως καλή
- ☐ Κάπως κακή
- ☐ Πολύ κακή
- ☐ Δεν γνωρίζω

**\* 9. Ποια είναι η οικογενειακή σας κατάσταση;**

- ☐ Ανύπαντρος/η
- ☐ Παντρεμένος/η
- ☐ Χωρισμένος/η
- ☐ Χήρος/α

**\* 10. Έχετε παιδιά;**

- ☐ Ναι
- ☐ Όχι

### 3 Αξιολόγηση υγείας

---

**\* 1. Γενικά, η υγεία σας είναι:**

- ☐ Άριστη
- ☐ Πολύ καλή
- ☐ Καλή
- ☐ Μέτρια

☐ Κακή

**\* 2. Πώς είναι η υγεία σας τώρα σε σύγκριση με έναν χρόνο πριν:**

- ☐ Πολύ καλύτερη  
☐ Κάπως καλύτερη  
☐ Περίπου η ίδια  
☐ Κάπως χειρότερη  
☐ Πολύ χειρότερη

**3. Η παρακάτω λίστα περιλαμβάνει μερικές δραστηριότητες που μπορεί να κάνουμε καθημερινά. Σας περιορίζει η υγεία σας από το να κάνετε αυτές τις δραστηριότητες και, αν ναι, σε ποιο βαθμό.**

*(Επιλέξτε μία δήλωση σε κάθε γραμμή)*

|                                                                                                                | Ναι, η υγεία μου με περιορίζει πολύ | Ναι, η υγεία μου με περιορίζει λίγο | Όχι, η υγεία μου δεν με περιορίζει καθόλου |
|----------------------------------------------------------------------------------------------------------------|-------------------------------------|-------------------------------------|--------------------------------------------|
| * Απαιτητικές δραστηριότητες, όπως τρέξιμο, ανύψωση βαριών αντικειμένων, συμμετοχή σε κουραστικά αθλήματα      | <input type="radio"/>               | <input type="radio"/>               | <input type="radio"/>                      |
| * Μέτριες δραστηριότητες, όπως η μετακίνηση ενός τραπεζιού, η ώθηση μιας ηλεκτρικής σκούπας, μπόουλινγκ, γκολφ | <input type="radio"/>               | <input type="radio"/>               | <input type="radio"/>                      |
| * Μεταφορά τσαντών με ψώνια σπιτιού                                                                            | <input type="radio"/>               | <input type="radio"/>               | <input type="radio"/>                      |
| * Να ανεβαίνω μερικούς ορόφους με τις σκάλες                                                                   | <input type="radio"/>               | <input type="radio"/>               | <input type="radio"/>                      |
| * Να ανεβαίνω έναν όροφο με σκάλες                                                                             | <input type="radio"/>               | <input type="radio"/>               | <input type="radio"/>                      |
| * Κάμψη σώματος, γονάτισμα, σκύψιμο                                                                            | <input type="radio"/>               | <input type="radio"/>               | <input type="radio"/>                      |
| * Περπάτημα για περισσότερο από 1 χιλιόμετρο                                                                   | <input type="radio"/>               | <input type="radio"/>               | <input type="radio"/>                      |
| * Περπάτημα για μερικά τετράγωνα                                                                               | <input type="radio"/>               | <input type="radio"/>               | <input type="radio"/>                      |
| * Περπάτημα για ένα τετράγωνο                                                                                  | <input type="radio"/>               | <input type="radio"/>               | <input type="radio"/>                      |
| * Μπάνιο, ντύσιμο                                                                                              | <input type="radio"/>               | <input type="radio"/>               | <input type="radio"/>                      |

**4. Κατά τις τελευταίες 4 εβδομάδες, είχατε κάποιο από τα παρακάτω προβλήματα στη δουλειά σας ή στις καθημερινές δραστηριότητές σας, ως αποτέλεσμα της σωματικής σας υγείας;**

*(Επιλέξτε μία δήλωση σε κάθε γραμμή)*

|  |     |     |
|--|-----|-----|
|  | Ναι | Όχι |
|--|-----|-----|

|                                                                                                                                         |                       |                       |
|-----------------------------------------------------------------------------------------------------------------------------------------|-----------------------|-----------------------|
| * Μείωση του χρόνου που αφιερώνετε στη δουλειά ή στις άλλες σας δραστηριότητες                                                          | <input type="radio"/> | <input type="radio"/> |
| * Πετύχατε λιγότερα από όσα θα θέλατε                                                                                                   | <input type="radio"/> | <input type="radio"/> |
| * Έχετε περιορισμούς στο να κάνετε τη δουλειά σας ή τις άλλες σας δραστηριότητες                                                        | <input type="radio"/> | <input type="radio"/> |
| * Έχετε δυσκολίες να κάνετε τη δουλειά σας ή τις άλλες σας δραστηριότητες (για παράδειγμα, χρειαστήκατε χρειαστήκατε περισσότερο χρόνο) | <input type="radio"/> | <input type="radio"/> |

**5. Κατά τις τελευταίες 4 εβδομάδες, είχατε κάποιο από τα παρακάτω προβλήματα στη δουλειά σας ή στις καθημερινές δραστηριότητές σας, ως αποτέλεσμα συναισθηματικών προβλημάτων (π. χ. κατάθλιψη, άγχος);**

*(Επιλέξτε μία δήλωση σε κάθε γραμμή)*

|                                                                                            | Ναι                   | Όχι                   |
|--------------------------------------------------------------------------------------------|-----------------------|-----------------------|
| * Μείωση του χρόνου που αφιερώνετε στη δουλειά ή στις άλλες σας δραστηριότητες             | <input type="radio"/> | <input type="radio"/> |
| * Πετύχατε λιγότερα από όσα θα θέλατε                                                      | <input type="radio"/> | <input type="radio"/> |
| * Δεν δουλεύετε ή δεν κάνετε τις άλλες σας δραστηριότητες με την ίδια προσοχή όπως συνήθως | <input type="radio"/> | <input type="radio"/> |

**\* 6. Κατά τις τελευταίες 4 εβδομάδες, σε τι βαθμό η σωματική υγεία ή τα συναισθηματικά σας προβλήματα επηρέασαν τις συνήθειες κοινωνικές σας δραστηριότητες με την οικογένεια, φίλους, γείτονες κλπ;**

- ☐ Καθόλου
- ☐ Λίγο
- ☐ Μέτρια
- ☐ Αρκετά
- ☐ Πολύ

**7. Οι παρακάτω ερωτήσεις αφορούν στο πως αισθάνεστε και πως είναι γενικά τα πράγματα στη ζωή σας κατά τις τελευταίες 4 εβδομάδες. Για κάθε ερώτηση, παρακαλώ σημειώστε την απάντηση που είναι πιο κοντά στον τρόπο που αισθάνεστε.**

*(Επιλέξτε μία δήλωση σε κάθε γραμμή)*

**Κατά τις τελευταίες 4 εβδομάδες, πόσο συχνά...**

|                                          | Συνέχεια              | Πολλές φορές          | Αρκετές φορές         | Μερικές φορές         | Λίγες φορές           | Ποτέ                  |
|------------------------------------------|-----------------------|-----------------------|-----------------------|-----------------------|-----------------------|-----------------------|
| * Αισθανθήκατε ότι είστε «γεμάτος/η ζωή» | <input type="radio"/> |
| * Ήσασταν νευρικός/η;                    | <input type="radio"/> |

|                                                                                  |                       |                       |                       |                       |                       |                       |
|----------------------------------------------------------------------------------|-----------------------|-----------------------|-----------------------|-----------------------|-----------------------|-----------------------|
| * Αισθανθήκατε τόσο καταβεβλημένος/η που τίποτα δε μπορούσε να σας ευχαριστήσει; | <input type="radio"/> |
| * Αισθανθήκατε ήρεμος/η;                                                         | <input type="radio"/> |
| * Αισθανθήκατε ότι έχετε πολλή ενέργεια.                                         | <input type="radio"/> |
| * Αισθανθήκατε κακόκεφος/η και μελαγχολικός/η;                                   | <input type="radio"/> |
| * Αισθανθήκατε εξουθενωμένος /η;                                                 | <input type="radio"/> |
| * Αισθανθήκατε χαρούμενος/η;                                                     | <input type="radio"/> |
| * Αισθανθήκατε κουρασμένος/η;                                                    | <input type="radio"/> |

**\* 8. Κατά τις τελευταίες 4 εβδομάδες, πόσο συχνά η σωματική σας υγεία ή τα συναισθηματικά σας προβλήματα δεν σας επέτρεψαν να έχετε κοινωνικές επαφές (πχ. να επισκεφθείτε φίλους, συγγενείς, κλπ.);**

- ☐ Συνέχεια  
☐ Αρκετές φορές  
☐ Μερικές φορές  
☐ Λίγες φορές  
☐ Ποτέ

**9. Πόσο αληθείς ή ψευδείς είναι οι παρακάτω δηλώσεις για εσάς.**

**(Επιλέξτε μία δήλωση σε κάθε γραμμή)**

|                                                   | Απολύτως αληθής       | Κυρίως αληθής         | Δεν γνωρίζω           | Κυρίως ψευδής         | Απολύτως ψευδής       |
|---------------------------------------------------|-----------------------|-----------------------|-----------------------|-----------------------|-----------------------|
| * Αρρωσταίνω πιο εύκολα απ' ότι οι άλλοι άνθρωποι | <input type="radio"/> |
| * Είμαι τόσο υγιής όσο και οι άλλοι               | <input type="radio"/> |
| * Αναμένω ότι η υγεία μου θα χειροτερέψει         | <input type="radio"/> |
| * Η υγεία μου είναι άριστη                        | <input type="radio"/> |

## 4 Περιβαλλοντικοί κίνδυνοι για την υγεία

**\* 10. Παρατηρείτε στοιχεία της κλιματικής αλλαγής στον πλανήτη;**

- ☐ Όχι, καθόλου

- ☐ Λίγο/Λίγα στοιχεία
- ☐ Περίπου/Μέτρια στοιχεία
- ☐ Αρκετά/Αρκετά στοιχεία
- ☐ Πάρα πολύ/ Πάρα πολλά στοιχεία

**11. Σκεφτόμενος/-η περιβαλλοντικούς παράγοντες όπως η κλιματική αλλαγή, η μόλυνση, τα (τοξικά) απόβλητα, πόσο συχνά πιστεύετε ότι θα προκύπτουν τα παρακάτω προβλήματα υγείας το 2028 (σε 10 χρόνια) σε σύγκριση με τώρα, στην Κύπρο;**

|                                                              | Πολύ<br>πιο<br>συχνά  | Κάπως<br>πιο<br>συχνά | Ίδια<br>συχνότητα     | Κάπως<br>λιγότερο<br>συχνά | Πολύ<br>λιγότερο<br>συχνά |
|--------------------------------------------------------------|-----------------------|-----------------------|-----------------------|----------------------------|---------------------------|
| * Αριθμός ασθενών με φυσικούς τραυματισμούς (π.χ. ατυχήματα) | <input type="radio"/> | <input type="radio"/> | <input type="radio"/> | <input type="radio"/>      | <input type="radio"/>     |
| * Αριθμός ασθενών με άσθμα                                   | <input type="radio"/> | <input type="radio"/> | <input type="radio"/> | <input type="radio"/>      | <input type="radio"/>     |
| * Αριθμός ασθενών με καρκίνο /κακοήθειες                     | <input type="radio"/> | <input type="radio"/> | <input type="radio"/> | <input type="radio"/>      | <input type="radio"/>     |
| * Αριθμός παχύσαρκων ατόμων                                  | <input type="radio"/> | <input type="radio"/> | <input type="radio"/> | <input type="radio"/>      | <input type="radio"/>     |
| * Αριθμός ατόμων με διαβήτη τύπου II                         | <input type="radio"/> | <input type="radio"/> | <input type="radio"/> | <input type="radio"/>      | <input type="radio"/>     |
| * Αριθμός ατόμων με υπέρταση                                 | <input type="radio"/> | <input type="radio"/> | <input type="radio"/> | <input type="radio"/>      | <input type="radio"/>     |

**12. Σε ποιο βαθμό πιστεύετε ότι επηρεάζονται οι παρακάτω παράγοντες από την κλιματική αλλαγή;**

|                                  | Επηρεάζονται<br>έντονα | Επηρεάζονται<br>αρκετά | Επηρεάζονται<br>μερικώς | Επηρεάζονται<br>λίγο  | Δεν<br>επηρεάζονται<br>καθόλου |
|----------------------------------|------------------------|------------------------|-------------------------|-----------------------|--------------------------------|
| * Αύξηση<br>θερμοκρασιών         | <input type="radio"/>  | <input type="radio"/>  | <input type="radio"/>   | <input type="radio"/> | <input type="radio"/>          |
| * Ακραία<br>καιρικά<br>φαινόμενα | <input type="radio"/>  | <input type="radio"/>  | <input type="radio"/>   | <input type="radio"/> | <input type="radio"/>          |
| *<br>Ατμοσφαιρική<br>ρύπανση     | <input type="radio"/>  | <input type="radio"/>  | <input type="radio"/>   | <input type="radio"/> | <input type="radio"/>          |
| * Ρύπανση<br>του νερού           | <input type="radio"/>  | <input type="radio"/>  | <input type="radio"/>   | <input type="radio"/> | <input type="radio"/>          |
| * Μόλυνση<br>των τροφίμων        | <input type="radio"/>  | <input type="radio"/>  | <input type="radio"/>   | <input type="radio"/> | <input type="radio"/>          |
| * Ρύπανση<br>του εδάφους         | <input type="radio"/>  | <input type="radio"/>  | <input type="radio"/>   | <input type="radio"/> | <input type="radio"/>          |
| * Επίπεδα<br>ακτινοβολίας        | <input type="radio"/>  | <input type="radio"/>  | <input type="radio"/>   | <input type="radio"/> | <input type="radio"/>          |



**\*13. Επιλέξτε 5 από τους παρακάτω παράγοντες που, κατά τη γνώμη σας, έχουν τη χειρότερη επίδραση στην υγεία σας.**

*μεταξύ 5 και 5 επιλογών*

- |                                                         |                                                  |
|---------------------------------------------------------|--------------------------------------------------|
| <input type="checkbox"/> ατμοσφαιρική ρύπανση           | <input type="checkbox"/> λειψυδρία               |
| <input type="checkbox"/> χημικά στο νερό και τα τρόφιμα | <input type="checkbox"/> (τοξικά) απόβλητα       |
| <input type="checkbox"/> Ρύπανση των αγροτικών περιοχών | <input type="checkbox"/> εξάντληση φυσικών πόρων |
| <input type="checkbox"/> ηχορύπανση                     | <input type="checkbox"/> μείωση βιοποικιλότητας  |
| <input type="checkbox"/> καταναλωτικές συνήθειες        | <input type="checkbox"/> υποβάθμιση του εδάφους  |
| <input type="checkbox"/> ξένα/επεμβατικά είδη           | <input type="checkbox"/> πλημμύρες               |
| <input type="checkbox"/> ρύπανση του νερού              |                                                  |

**\*14. Πόσο σημαντικοί πιστεύετε ότι είναι οι περιβαλλοντικοί παράγοντες στην ανάπτυξη /πρόκληση ασθενειών;**

- ☐ Πολύ σημαντικοί  
☐ Κάπως σημαντικοί  
☐ Όχι και τόσο σημαντικοί  
☐ Καθόλου σημαντικοί  
☐ Δεν γνωρίζω

**15. Πόσο επικίνδυνες για την υγεία πιστεύετε ότι είναι οι παρακάτω περιβαλλοντικές εκθέσεις;**

|                                  | Πολύ<br>σοβαρός<br>κίνδυνος | Κάπως<br>σοβαρός<br>κίνδυνος | Κάπως<br>μικρός<br>κίνδυνος | Καθόλου<br>κίνδυνος   | Δεν<br>γνωρίζω        |
|----------------------------------|-----------------------------|------------------------------|-----------------------------|-----------------------|-----------------------|
| * ατμοσφαιρική ρύπανση           | <input type="radio"/>       | <input type="radio"/>        | <input type="radio"/>       | <input type="radio"/> | <input type="radio"/> |
| * ρύπανση του νερού              | <input type="radio"/>       | <input type="radio"/>        | <input type="radio"/>       | <input type="radio"/> | <input type="radio"/> |
| * χημικά στο νερό και τα τρόφιμα | <input type="radio"/>       | <input type="radio"/>        | <input type="radio"/>       | <input type="radio"/> | <input type="radio"/> |
| * (τοξικά) απόβλητα              | <input type="radio"/>       | <input type="radio"/>        | <input type="radio"/>       | <input type="radio"/> | <input type="radio"/> |
| * καύσωνας                       | <input type="radio"/>       | <input type="radio"/>        | <input type="radio"/>       | <input type="radio"/> | <input type="radio"/> |
| * πλημμύρες                      | <input type="radio"/>       | <input type="radio"/>        | <input type="radio"/>       | <input type="radio"/> | <input type="radio"/> |
| * λειψυδρία                      | <input type="radio"/>       | <input type="radio"/>        | <input type="radio"/>       | <input type="radio"/> | <input type="radio"/> |
| * ρύπανση των αγροτικών περιοχών | <input type="radio"/>       | <input type="radio"/>        | <input type="radio"/>       | <input type="radio"/> | <input type="radio"/> |
| * ηχορύπανση                     | <input type="radio"/>       | <input type="radio"/>        | <input type="radio"/>       | <input type="radio"/> | <input type="radio"/> |
| * καταναλωτικές συνήθειες        | <input type="radio"/>       | <input type="radio"/>        | <input type="radio"/>       | <input type="radio"/> | <input type="radio"/> |
| * ξένα/επεμβατικά είδη           | <input type="radio"/>       | <input type="radio"/>        | <input type="radio"/>       | <input type="radio"/> | <input type="radio"/> |

|                           |                       |                       |                       |                       |                       |
|---------------------------|-----------------------|-----------------------|-----------------------|-----------------------|-----------------------|
| * εξάντληση φυσικών πόρων | <input type="radio"/> |
| * μείωση βιοποικιλότητας  | <input type="radio"/> |
| * υποβάθμιση του εδάφους  | <input type="radio"/> |

**16. Σκεπτόμενος/-η τις ασθένειες του παρακάτω πίνακα, πιστεύετε ότι οι περιβαλλοντικοί παράγοντες παίζουν μεγάλο, μικρό, ή κανένα ρόλο στην εμφάνισή τους;**

|                                                                               | Μεγάλος ρόλος         | Μικρός ρόλος          | Κανένας ρόλος         | Δεν γνωρίζω           |
|-------------------------------------------------------------------------------|-----------------------|-----------------------|-----------------------|-----------------------|
| * Καρκίνος/κακοήθειες σε παιδιά, πχ. λευχαιμία                                | <input type="radio"/> | <input type="radio"/> | <input type="radio"/> | <input type="radio"/> |
| * Υπογονιμότητα                                                               | <input type="radio"/> | <input type="radio"/> | <input type="radio"/> | <input type="radio"/> |
| * Παιδικό άσθμα                                                               | <input type="radio"/> | <input type="radio"/> | <input type="radio"/> | <input type="radio"/> |
| * Αναπνευστικά προβλήματα και αλλεργίες                                       | <input type="radio"/> | <input type="radio"/> | <input type="radio"/> | <input type="radio"/> |
| * Γενετικές ανωμαλίες                                                         | <input type="radio"/> | <input type="radio"/> | <input type="radio"/> | <input type="radio"/> |
| * Καρκίνος του στήθους                                                        | <input type="radio"/> | <input type="radio"/> | <input type="radio"/> | <input type="radio"/> |
| * Υπέρταση                                                                    | <input type="radio"/> | <input type="radio"/> | <input type="radio"/> | <input type="radio"/> |
| * κρύωμα και γρίπη                                                            | <input type="radio"/> | <input type="radio"/> | <input type="radio"/> | <input type="radio"/> |
| * καρκίνος του προστάτη                                                       | <input type="radio"/> | <input type="radio"/> | <input type="radio"/> | <input type="radio"/> |
| * Όγκοι του εγκεφάλου                                                         | <input type="radio"/> | <input type="radio"/> | <input type="radio"/> | <input type="radio"/> |
| * άσθμα σε ενήλικες                                                           | <input type="radio"/> | <input type="radio"/> | <input type="radio"/> | <input type="radio"/> |
| * παχυσαρκία                                                                  | <input type="radio"/> | <input type="radio"/> | <input type="radio"/> | <input type="radio"/> |
| * Διαβήτης τύπου 2                                                            | <input type="radio"/> | <input type="radio"/> | <input type="radio"/> | <input type="radio"/> |
| * Καρκίνος του θυρεοειδούς                                                    | <input type="radio"/> | <input type="radio"/> | <input type="radio"/> | <input type="radio"/> |
| * Νοσήματα (π.χ. ελονοσία) που μεταδίδονται μέσω διαβιβαστών (π.χ. κουνούπια) | <input type="radio"/> | <input type="radio"/> | <input type="radio"/> | <input type="radio"/> |
| * Μεταδοτικές ασθένειες όπως ιλαρά, φυματίωση, και ηπατίτιδα                  | <input type="radio"/> | <input type="radio"/> | <input type="radio"/> | <input type="radio"/> |

**17. Κατά τη γνώμη σας, πόσα πράγματα/δράσεις μπορούν να κάνουν πολίτες σαν εσάς για να προστατευτούν από τα παρακάτω:**

|  | Πολλά πράγματα | Μερικά πράγματα | Λίγα πράγματα | Τίποτα | Δεν γνωρίζω |
|--|----------------|-----------------|---------------|--------|-------------|
|--|----------------|-----------------|---------------|--------|-------------|

|                                                                                                                                |                       |                       |                       |                       |                       |
|--------------------------------------------------------------------------------------------------------------------------------|-----------------------|-----------------------|-----------------------|-----------------------|-----------------------|
| * Μεταδοτικές ασθένειες όπως ιλαρά, φυματίωση, και ηπατίτιδα                                                                   | <input type="radio"/> |
| * Προβλήματα υγείας που προκαλούνται από περιβαλλοντικούς παράγοντες όπως η κλιματική αλλαγή, η μόλυνση ή τα (τοξικά) απόβλητα | <input type="radio"/> |

## 5 Πηγές ενημέρωσης

### \* 18. Με ποιούς από τους παρακάτω τρόπους/μέσα λαμβάνετε πληροφορίες για περιβαλλοντικούς κινδύνους; - Μπορείτε να επιλέξετε μέχρι 5

μεταξύ 1 και 5 επιλογών

- |                                                                                          |                                                                            |
|------------------------------------------------------------------------------------------|----------------------------------------------------------------------------|
| <input type="checkbox"/> Μέσα κοινωνικής δικτύωσης (πχ. Facebook) και διαδίκτυο/ίντερνετ | <input type="checkbox"/> Δημοσιεύσεις, φυλλάδιο και άλλο ενημερωτικό υλικό |
| <input type="checkbox"/> Νέα στην τηλεόραση                                              | <input type="checkbox"/> Ραδιόφωνο                                         |
| <input type="checkbox"/> Ταινίες και ντοκυμαντέρ στην τηλεόραση                          | <input type="checkbox"/> Περιοδικά                                         |
| <input type="checkbox"/> Συζητήσεις με συγγενείς, την οικογένεια, φίλους, γείτονες κλπ.  | <input type="checkbox"/> Βιβλία                                            |
| <input type="checkbox"/> Εφημερίδες                                                      | <input type="checkbox"/> Εκδηλώσεις (συνέδρια, εκθέσεις, φεστιβάλ)         |
| <input type="checkbox"/> Γιατροί                                                         | <input type="checkbox"/> Πολιτικοί                                         |
| <input type="checkbox"/> Εκπαιδευτικό υλικό, διαλέξεις και μαθήματα                      | <input type="checkbox"/> Άλλο                                              |

### 19. Πόσο αξιόπιστες θεωρείτε τις ακόλουθες πηγές πληροφοριών;

|                                                                    | Πολύ αξιόπιστη        | Αρκετά αξιόπιστη      | Μέτρια αξιόπιστη      | Λίγο αξιόπιστη        | Καθόλου αξιόπιστη     |
|--------------------------------------------------------------------|-----------------------|-----------------------|-----------------------|-----------------------|-----------------------|
| * Μέσα κοινωνικής δικτύωσης (πχ. Facebook) και διαδίκτυο /ίντερνετ | <input type="radio"/> |
| * Νέα στην τηλεόραση                                               | <input type="radio"/> |
| * Ταινίες και ντοκυμαντέρ στην τηλεόραση                           | <input type="radio"/> |
| * Συζητήσεις με συγγενείς, την οικογένεια, φίλους, γείτονες κλπ.   | <input type="radio"/> |
| * Εφημερίδες                                                       | <input type="radio"/> |
| * Γιατροί                                                          | <input type="radio"/> |
| * Εκπαιδευτικό υλικό, διαλέξεις και μαθήματα                       | <input type="radio"/> |
| * Δημοσιεύσεις, φυλλάδια και άλλο ενημερωτικό υλικό                | <input type="radio"/> |

|                                             |                       |                       |                       |                       |                       |
|---------------------------------------------|-----------------------|-----------------------|-----------------------|-----------------------|-----------------------|
| * Ραδιόφωνο                                 | <input type="radio"/> |
| * Περιοδικά                                 | <input type="radio"/> |
| * Βιβλία                                    | <input type="radio"/> |
| * Εκδηλώσεις (συνέδρια, εκθέσεις, φεστιβάλ) | <input type="radio"/> |
| * Πολιτικοί                                 | <input type="radio"/> |

**20. Κάποιοι πολίτες αναφέρουν ότι δεν έχουν αρκετή πληροφόρηση για τα θέματα που διαπραγματεύεται η έρευνα. Εσείς τι πιστεύετε; Έχετε αρκετή πληροφόρηση ή χρειάζεστε παραπάνω πληροφόρηση για τα παρακάτω θέματα;**

|                                                                                                                                              | Ναι, έχω αρκετή πληροφόρηση | Θα ήθελα παραπάνω πληροφόρηση | Όχι δεν θα ήθελα να λαμβάνω αυτές τις πληροφορίες | Δεν γνωρίζω           |
|----------------------------------------------------------------------------------------------------------------------------------------------|-----------------------------|-------------------------------|---------------------------------------------------|-----------------------|
| * την κατάσταση του περιβάλλοντος στην κοινότητά σας                                                                                         | <input type="radio"/>       | <input type="radio"/>         | <input type="radio"/>                             | <input type="radio"/> |
| * τις επιπτώσεις της κλιματικής αλλαγής στον πληθυσμό της Κύπρου                                                                             | <input type="radio"/>       | <input type="radio"/>         | <input type="radio"/>                             | <input type="radio"/> |
| * για το τι μπορούμε να κάνουμε για να προστατεύσουμε τους εαυτούς μας και την οικογένειά μας από προβλήματα υγείας σχετικά με το περιβάλλον | <input type="radio"/>       | <input type="radio"/>         | <input type="radio"/>                             | <input type="radio"/> |
| * για το τι μπορούμε να κάνουμε για να προστατεύσουμε τους εαυτούς μας και την οικογένειά μας από τις επιπτώσεις της κλιματικής αλλαγής      | <input type="radio"/>       | <input type="radio"/>         | <input type="radio"/>                             | <input type="radio"/> |

**\* 21. Με ποιούς από τους παρακάτω τρόπους/μέσα θέλετε να λαμβάνετε πληροφορίες για περιβαλλοντικούς κινδύνους; - Μπορείτε να επιλέξετε μέχρι 5.**

*μεταξύ 1 και 5 επιλογών*

- |                                                                                          |                                                                            |
|------------------------------------------------------------------------------------------|----------------------------------------------------------------------------|
| <input type="checkbox"/> Μέσα κοινωνικής δικτύωσης (πχ. Facebook) και διαδίκτυο/ίντερνετ | <input type="checkbox"/> Δημοσιεύσεις, φυλλάδιο και άλλο ενημερωτικό υλικό |
| <input type="checkbox"/> Νέα στην τηλεόραση                                              | <input type="checkbox"/> Ραδιόφωνο                                         |
| <input type="checkbox"/> Ταινίες και ντοκυμαντέρ στην τηλεόραση                          | <input type="checkbox"/> Περιοδικά                                         |
| <input type="checkbox"/> Συζητήσεις με συγγενείς, την οικογένεια, φίλους, γείτονες κλπ.  | <input type="checkbox"/> Βιβλία                                            |
| <input type="checkbox"/> Εφημερίδες                                                      | <input type="checkbox"/> Εκδηλώσεις (συνέδρια, εκθέσεις, φεστιβάλ)         |
| <input type="checkbox"/> Γιατροί                                                         | <input type="checkbox"/> Πολιτικοί                                         |
| <input type="checkbox"/> Εκπαιδευτικό υλικό, διαλέξεις και μαθήματα                      | <input type="checkbox"/> Άλλο                                              |

## 6 Σας ευχαριστώ!

---

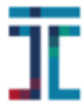

Cyprus  
University of  
Technology

Cyprus International  
Institute for Environmental  
and Public Health

Water and Health Laboratory

Κάντε κλικ στο κουμπί "υποβολή" για να στείλετε τις απαντήσεις σας.
