# Supplementary material
Source: MDPI journal article supplement (https://www.mdpi.com/2225-1154/10/9/129)
Supplement: s1 [file s1]

# Climate and Health Survey 2021

Please complete the survey below.

Thank you!

---

Παρακαλώ επιλέξτε γλώσσα: / Please select language:

- ☐ Ελληνικά / Greek
- ☐ Αγγλικά / English

**Εισαγωγή**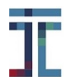

Τεχνολογικό  
Πανεπιστήμιο  
Κύπρου

Διεθνές Ινστιτούτο Κύπρου  
για την Περιβαλλοντική και  
Δημόσια Υγεία

water and  
health  
[laboratory]

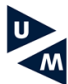

**Maastricht University**

**Απόψεις σχετικά με τις  
επιπτώσεις της κλιματικής  
αλλαγής στην υγεία**

Αγαπητέ/ή συμμετέχοντα/ουσα,

Σας ευχαριστούμε για το ενδιαφέρον σας για την έρευνα μας!

Τα φαινόμενα που συνοδεύουν την κλιματική αλλαγή έχουν πολλαπλές επιδράσεις στη ζωή και την υγεία μας.

Στην Κύπρο, για παράδειγμα, τα τελευταία χρόνια παρατηρούνται καύσωνες και δασικές πυρκαγιές με μεγαλύτερη συχνότητα και μεγάλες περίοδοι χωρίς βροχή που επηρεάζουν άμεσα και τα αποθέματα νερού.

Κύριος σκοπός της μελέτης:

Σκοπός της μελέτης είναι να μάθουμε τις απόψεις των κατοίκων της Κύπρου σχετικά με τις επιπτώσεις της κλιματικής αλλαγής και των περιβαλλοντικών παραγόντων στην υγεία. Ο όρος 'περιβαλλοντικοί παράγοντες' αναφέρεται σε οτιδήποτε υπάρχει στο περιβάλλον μας και δεν είναι γενετική ή βιολογική διαδικασία του σώματός μας.

Ποιο το όφελος συμμετοχής σας στην έρευνα;

Οι απαντήσεις σας στο ερωτηματολόγιο που ακολουθεί θα αποτελέσουν τη βάση για να μπορέσουμε να συμπεριλάβουμε πιο αποτελεσματικά τους πολίτες, ισότιμα, με άλλους αρμόδιους φορείς σε μελλοντικές ερευνητικές προσπάθειες και να αναπτύξουμε πιο αποτελεσματικές πρωτοβουλίες επικοινωνίας με την κοινή γνώμη.

Σημαντικές πληροφορίες

Λεπτομέρειες οποιονδήποτε κινδύνων που πιθανόν να υπάρξουν ή ταλαιπωρία που τυχόν θα υποστούν οι συμμετέχοντες στο πρόγραμμα

Δεν αναμένεται κανένας κίνδυνος ή ταλαιπωρία για τους συμμετέχοντες

Λεπτομέρειες για το ποιες πληροφορίες θα συλλεγούν στα πλαίσια της ερευνητικής πρότασης, ποιος/ποιοι θα έχουν πρόσβαση σε αυτά και για πόσο χρονικό διάστημα

Όλα τα δεδομένα που θα συλλεχθούν θα χρησιμοποιηθούν για στατιστική επεξεργασία μαζί με τα αποτελέσματα των άλλων συμμετεχόντων στη μελέτη, χωρίς να φαίνονται τα προσωπικά σας στοιχεία.

Η ανωνυμία σας θα διασφαλιστεί καθ' όλη τη διεξαγωγή της έρευνας και κατά τη δημοσιοποίηση των αποτελεσμάτων σε συνέδρια, επιστημονικά περιοδικά, κτλ.

Η πλήρης βάση δεδομένων και ο κώδικας σύνδεσης των δεδομένων θα φυλάγεται σε ασφαλές μέρος με πρόσβαση σε αυτά μόνο η ερευνητική ομάδα.

Τα δεδομένα που θα αποκτηθούν από την μελέτη θα αποθηκευτούν σε ασφαλή χώρο από το Διεθνές Ινστιτούτο Κύπρου για την Περιβαλλοντική και Δημόσια Υγεία για 10 χρόνια και μετά θα καταστραφούν.

Ο συνολικός χρόνος συμπλήρωσης του ερωτηματολογίου κυμαίνεται μεταξύ 8 - 10 λεπτών.

Αναμενόμενο όφελος για ερευνητές ή/και χρηματοδότες

Η μελέτη στοχεύει στη διερεύνηση των κυπριακών αντιλήψεων σχετικά με τους κινδύνους για την υγεία που σχετίζονται με το κλίμα. Για να εξερευνηθεί το πώς έχουν αλλάξει οι αντιλήψεις με την πάροδο του χρόνου, αυτή η μελέτη θα συγκρίνει τα αποτελέσματα με την έρευνα του 2018 από το Εργαστήριο Νερού και Υγείας του Τεχνολογικού Πανεπιστημίου Κύπρου.

Επομένως, αυτή η μελέτη θα συγκρίνει αποτελέσματα από δύο διαφορετικά δείγματα του ίδιου πληθυσμού σε δύο χρονικά σημεία. Επιπλέον, αυτές οι αντιλήψεις θα συγκριθούν με παράγοντες, όπως η ηλικία, η περιοχή διαμονής, το μορφωτικό επίπεδο και η αυτοαξιολογούμενη υγεία. Αυτό μπορεί να απεικονίσει τις διαφορές στην αντίληψη ανάμεσα σε έναν πληθυσμό, οι οποίες είναι πιθανό να βρεθούν και για τους τέσσερις παράγοντες. Η παρούσα μελέτη αποτελεί μέρος μιας διπλωματικής εργασίας.

Περιγραφή διαδικασιών χειρισμού δεδομένων των συμμετεχόντων που θα αποσυρθούν από τη μελέτη πριν την ολοκλήρωση της

Η συλλογή των δεδομένων ακολουθεί τον γενικό κανονισμό για την προστασία δεδομένων (GDPR).

Η συμπλήρωση του ερωτηματολογίου είναι εθελοντική.

Κατά τη διάρκεια του ερωτηματολογίου, μπορείτε να αποσύρετε την συμμετοχή σας κλείνοντας απλά το παράθυρο. Οι απαντήσεις σας αποθηκεύονται μόνο εάν επιλέξετε την εντολή "SUBMIT" που εμφανίζεται στο τέλος του ερωτηματολογίου.

Η μελέτη διεξάγεται από το Διεθνές Ινστιτούτο Κύπρου για την Περιβαλλοντική και Δημόσια Υγεία του Τεχνολογικού Πανεπιστημίου Κύπρου σε συνεργασία με το μεταπτυχιακό πρόγραμμα Παγκόσμιας Υγείας του Πανεπιστημίου Μάαστριχτ (Ολλανδία).

Πλήρη στοιχεία επικοινωνίας και θέση ατόμου στο οποίο οι συμμετέχοντες μπορούν να υποβάλλουν παράπονα ή καταγγελίες που αφορούν το πρόγραμμα στο οποίο συμμετέχουν

Δρ. Χαράλαμπος Χρυσοστόμου, Προϊστάμενος Υπηρεσίας Έρευνας Διεθνούς Συνεργασίας και Δημοσίων Σχέσεων του ΤΕΠΑΚ

Τηλέφωνο: +357-250025

Πλήρη στοιχεία επικοινωνίας και τίτλος του προσώπου με το οποίο οι συμμετέχοντες μπορούν να επικοινωνήσουν για περισσότερες πληροφορίες ή διευκρινίσεις σχετικά με τη διαχείριση των προσωπικών δεδομένων

Κα Μαρία Ιωάννου, Υπεύθυνη Προστασίας Δεδομένων του ΤΕΠΑΚ

Τηλέφωνο: +357-25002355

Email: [gdpr.dpo@cut.ac.cy](mailto:gdpr.dpo@cut.ac.cy)

Πλήρη στοιχεία επικοινωνίας και θέση ατόμου στο οποίο οι συμμετέχοντες μπορούν να απευθυνθούν για περισσότερες πληροφορίες ή διευκρινήσεις για το ερευνητικό πρόγραμμα

Sarah Connon, Μεταπτυχιακή φοιτήτρια του προγράμματος Παγκόσμιας Υγείας του Πανεπιστημίου Μάαστριχτ (Ολλανδία)

Email: [s.connon@student.maastrichtuniversity.nl](mailto:s.connon@student.maastrichtuniversity.nl)

Κορίνα Κωνσταντίνου, Ερευνητική Συνεργάτιδα, Water and Health Lab

Τηλέφωνο: +357-25002282

Email: [waterandhealthlab@cut.ac.cy](mailto:waterandhealthlab@cut.ac.cy)

Αν χρειάζεστε παραπάνω πληροφορίες σχετικά με τη μελέτη και τις άλλες ερευνητικές μας δραστηριότητες, μπορείτε να επικοινωνήσετε μαζί μας μέσω της ηλεκτρονικής διεύθυνσης: [waterandhealthlab@cut.ac.cy](mailto:waterandhealthlab@cut.ac.cy).

Αν συμφωνείτε να απαντήσετε το ερωτηματολόγιο, επιλέξτε το κουτάκι στο τέλος της σελίδας.

Ευχαριστούμε πολύ!

Sarah Connon  
MSc Global Health  
Maastricht University, the Netherlands

Κωνσταντίνος Χ. Μακρής, PhD  
Αναπληρωτής Καθηγητής Περιβαλλοντικής Υγείας  
Water and Health Laboratory  
Διεθνές Ινστιτούτο Κύπρου για την Περιβαλλοντική και Δημόσια Υγεία  
Τεχνολογικό Πανεπιστήμιο Κύπρου

☐ Έχω διαβάσει όλες τις πιο πάνω πληροφορίες και επιθυμώ να απαντήσω το ερωτηματολόγιο.

**Αξιολόγηση υγείας**

Γενικά, η υγεία σας είναι:

- ☐ Άριστη
- ☐ Πολύ καλή
- ☐ Καλή
- ☐ Μέτρια
- ☐ Κακή

---

Πώς είναι η υγεία σας τώρα σε σύγκριση με έναν χρόνο πριν:

- ☐ Πολύ καλύτερη
- ☐ Κάπως καλύτερη
- ☐ Περίπου η ίδια
- ☐ Κάπως χειρότερη
- ☐ Πολύ χειρότερη

**Η παρακάτω λίστα περιλαμβάνει μερικές δραστηριότητες που μπορεί να κάνουμε καθημερινά. Σας περιορίζει η υγεία σας από το να κάνετε αυτές τις δραστηριότητες και, αν ναι, σε ποιο βαθμό.**

|                                                                                                               | Ναι, η υγεία μου με<br>περιορίζει πολύ | Ναι, η υγεία μου με<br>περιορίζει λίγο | Όχι, η υγεία μου δεν με<br>περιορίζει καθόλου |
|---------------------------------------------------------------------------------------------------------------|----------------------------------------|----------------------------------------|-----------------------------------------------|
| Απαιτητικές δραστηριότητες, όπως τρέξιμο, ανύψωση βαριών αντικειμένων, συμμετοχή σε κουραστικά αθλήματα.      | <input type="radio"/>                  | <input type="radio"/>                  | <input type="radio"/>                         |
| Μέτριες δραστηριότητες, όπως η μετακίνηση ενός τραπεζιού, η ώθηση μιας ηλεκτρικής σκούπας, μπόουλινγκ, γκολφ. | <input type="radio"/>                  | <input type="radio"/>                  | <input type="radio"/>                         |
| Μεταφορά τσαντών με ψώνια σπιτιού.                                                                            | <input type="radio"/>                  | <input type="radio"/>                  | <input type="radio"/>                         |
| Να ανεβαίνω μερικούς ορόφους με τις σκάλες.                                                                   | <input type="radio"/>                  | <input type="radio"/>                  | <input type="radio"/>                         |
| Να ανεβαίνω έναν όροφο με σκάλες.                                                                             | <input type="radio"/>                  | <input type="radio"/>                  | <input type="radio"/>                         |
| Κάμψη σώματος, γονάτισμα, σκύψιμο.                                                                            | <input type="radio"/>                  | <input type="radio"/>                  | <input type="radio"/>                         |
| Περπάτημα για περισσότερο από 1 χιλιόμετρο.                                                                   | <input type="radio"/>                  | <input type="radio"/>                  | <input type="radio"/>                         |
| Περπάτημα για μερικά τετράγωνα.                                                                               | <input type="radio"/>                  | <input type="radio"/>                  | <input type="radio"/>                         |
| Περπάτημα για ένα τετράγωνο.                                                                                  | <input type="radio"/>                  | <input type="radio"/>                  | <input type="radio"/>                         |
| Μπάνιο, ντύσιμο.                                                                                              | <input type="radio"/>                  | <input type="radio"/>                  | <input type="radio"/>                         |

**Κατά τις τελευταίες 4 εβδομάδες, είχατε κάποιο από τα παρακάτω προβλήματα στη δουλειά σας ή στις καθημερινές δραστηριότητές σας, ως αποτέλεσμα της σωματικής σας υγείας;**

Ναι

Όχι

Μείωση του χρόνου που αφιερώνετε στη δουλειά ή στις άλλες σας δραστηριότητες.

☐☐

Πετύχατε λιγότερα από όσα θα θέλατε.

☐☐

Έχετε περιορισμούς στο να κάνετε τη δουλειά σας ή τις άλλες σας δραστηριότητες

☐☐

Έχετε δυσκολίες να κάνετε τη δουλειά σας ή τις άλλες σας δραστηριότητες (για παράδειγμα, χρειαστήκατε χρειαστήκατε περισσότερο χρόνο)

☐☐

**Κατά τις τελευταίες 4 εβδομάδες, είχατε κάποιο από τα παρακάτω προβλήματα στη δουλειά σας ή στις καθημερινές δραστηριότητές σας, ως αποτέλεσμα συναισθηματικών προβλημάτων (π.χ. κατάθλιψη, άγχος);**

|                                                                                           | Ναι                   | Όχι                   |
|-------------------------------------------------------------------------------------------|-----------------------|-----------------------|
| Μείωση του χρόνου που αφιερώνετε στη δουλειά ή στις άλλες σας δραστηριότητες.             | <input type="radio"/> | <input type="radio"/> |
| Πετύχατε λιγότερα από όσα θα θέλατε.                                                      | <input type="radio"/> | <input type="radio"/> |
| Δεν δουλεύετε ή δεν κάνετε τις άλλες σας δραστηριότητες με την ίδια προσοχή όπως συνήθως. | <input type="radio"/> | <input type="radio"/> |

Κατά τις τελευταίες 4 εβδομάδες, σε τι βαθμό η σωματική υγεία ή τα συναισθηματικά σας προβλήματα επηρέασαν τις συνήθειες κοινωνικές σας δραστηριότητες με την οικογένεια, φίλους, γείτονες κλπ;

- ☐ Καθόλου
- ☐ Λίγο
- ☐ Μέτρια
- ☐ Αρκετά
- ☐ Πολύ



**Οι παρακάτω ερωτήσεις αφορούν στο πως αισθάνεστε και πως είναι γενικά τα πράγματα στη ζωή σας κατά τις τελευταίες 4 εβδομάδες. Για κάθε ερώτηση, παρακαλώ σημειώστε την απάντηση που είναι πιο κοντά στον τρόπο που αισθάνεστε.**

**Κατά τις τελευταίες 4 εβδομάδες, πόσο συχνά...**

|                                                                                | Συνέχεια              | Αρκετές φορές         | Μερικές φορές         | Λίγες φορές           | Ποτέ                  |
|--------------------------------------------------------------------------------|-----------------------|-----------------------|-----------------------|-----------------------|-----------------------|
| Αισθανθήκατε ότι είστε 'γεμάτος/η ζωή';                                        | <input type="radio"/> |
| Ήσασταν νευρικός/η;                                                            | <input type="radio"/> |
| Αισθανθήκατε τόσο καταβεβλημένος/η που τίποτα δε μπορούσε να σας ευχαριστήσει; | <input type="radio"/> |
| Αισθανθήκατε ήρεμος/η;                                                         | <input type="radio"/> |
| Αισθανθήκατε ότι έχετε πολλή ενέργεια;                                         | <input type="radio"/> |
| Αισθανθήκατε κακόκεφος/η και μελαγχολικός/η;                                   | <input type="radio"/> |
| Αισθανθήκατε εξουθενωμένος/η;                                                  | <input type="radio"/> |
| Αισθανθήκατε χαρούμενος/η;                                                     | <input type="radio"/> |
| Αισθανθήκατε κουρασμένος/η;                                                    | <input type="radio"/> |

Κατά τις τελευταίες 4 εβδομάδες, πόσο συχνά η σωματική σας υγεία ή τα συναισθηματικά σας προβλήματα δεν σας επέτρεψαν να έχετε κοινωνικές επαφές (πχ. να επισκεφθείτε φίλους, συγγενείς, κλπ.);

- ☐ Συνέχεια  
☐ Αρκετές φορές  
☐ Μερικές φορές  
☐ Λίγες φορές  
☐ Ποτέ

**Πόσο αληθείς ή ψευδείς είναι οι παρακάτω δηλώσεις για εσάς;**

|                                                  | Απολύτως αληθής       | Κυρίως αληθής         | Δεν γνωρίζω           | Κυρίως ψευδής         | Απολύτως ψευδής       |
|--------------------------------------------------|-----------------------|-----------------------|-----------------------|-----------------------|-----------------------|
| Αρρωσταίνω πιο εύκολα απ' ότι οι άλλοι άνθρωποι. | <input type="radio"/> |
| Είμαι τόσο υγιής όσο και οι άλλοι.               | <input type="radio"/> |
| Αναμένω ότι η υγεία μου θα χειροτερέψει.         | <input type="radio"/> |
| Η υγεία μου είναι άριστη.                        | <input type="radio"/> |

**Περιβαλλοντικοί κίνδυνοι για την υγεία**

Παρατηρείτε στοιχεία της κλιματικής αλλαγής στον πλανήτη;

- ☐ Όχι, καθόλου
- ☐ Λίγο/Λίγα στοιχεία
- ☐ Περίπου/Μέτρια στοιχεία
- ☐ Αρκετά/Αρκετά στοιχεία
- ☐ Πάρα πολύ/ Πάρα πολλά στοιχεία

**Σκεφτόμενος/-η περιβαλλοντικούς παράγοντες όπως η κλιματική αλλαγή, η μόλυνση, τα (τοξικά) απόβλητα, πόσο συχνά πιστεύετε ότι θα προκύπτουν τα παρακάτω προβλήματα υγείας το 2031 (σε 10 χρόνια) σε σύγκριση με τώρα, στην Κύπρο;**

|                                                             | Πολύ πιο συχνά        | Κάπως πιο συχνά       | Ίδια συχνότητα        | Κάπως λιγότερο συχνά  | Πολύ λιγότερο συχνά   |
|-------------------------------------------------------------|-----------------------|-----------------------|-----------------------|-----------------------|-----------------------|
| Αριθμός ασθενών με φυσικούς τραυματισμούς (π.χ. ατυχήματα). | <input type="radio"/> |
| Αριθμός ασθενών με άσθμα.                                   | <input type="radio"/> |
| Αριθμός ασθενών με καρκίνο/κακοήθειες.                      | <input type="radio"/> |
| Αριθμός παχύσαρκων ατόμων.                                  | <input type="radio"/> |
| Αριθμός ατόμων με διαβήτη τύπου II.                         | <input type="radio"/> |
| Αριθμός ατόμων με υπέρταση.                                 | <input type="radio"/> |
| Αριθμός ατόμων με μολυσματικές ασθένειες.                   | <input type="radio"/> |
| Αριθμός ατόμων με ψυχικές ασθένειες.                        | <input type="radio"/> |

**Σε ποιο βαθμό πιστεύετε ότι επηρεάζονται οι παρακάτω παράγοντες από την κλιματική αλλαγή;**

|                          | Επηρεάζονται<br>έντονα | Επηρεάζονται<br>αρκετά | Επηρεάζονται<br>μερικώς | Επηρεάζονται<br>λίγο  | Δεν<br>επηρεάζονται<br>καθόλου |
|--------------------------|------------------------|------------------------|-------------------------|-----------------------|--------------------------------|
| Αύξηση θερμοκρασιών      | <input type="radio"/>  | <input type="radio"/>  | <input type="radio"/>   | <input type="radio"/> | <input type="radio"/>          |
| Ακραία καιρικά φαινόμενα | <input type="radio"/>  | <input type="radio"/>  | <input type="radio"/>   | <input type="radio"/> | <input type="radio"/>          |
| Ατμοσφαιρική ρύπανση     | <input type="radio"/>  | <input type="radio"/>  | <input type="radio"/>   | <input type="radio"/> | <input type="radio"/>          |
| Ρύπανση του νερού        | <input type="radio"/>  | <input type="radio"/>  | <input type="radio"/>   | <input type="radio"/> | <input type="radio"/>          |
| Μόλυνση των τροφίμων     | <input type="radio"/>  | <input type="radio"/>  | <input type="radio"/>   | <input type="radio"/> | <input type="radio"/>          |
| Ρύπανση του εδάφους      | <input type="radio"/>  | <input type="radio"/>  | <input type="radio"/>   | <input type="radio"/> | <input type="radio"/>          |
| Επίπεδα ακτινοβολίας     | <input type="radio"/>  | <input type="radio"/>  | <input type="radio"/>   | <input type="radio"/> | <input type="radio"/>          |

Επιλέξτε 5 από τους παρακάτω παράγοντες που, κατά τη γνώμη σας, έχουν τη χειρότερη επίδραση στην υγεία σας.

- ☐ Ατμοσφαιρική ρύπανση
- ☐ Λειψυδρία
- ☐ Χημικά στο νερό και τα τρόφιμα
- ☐ (τοξικά) Απόβλητα
- ☐ Ρύπανση των αγροτικών περιοχών
- ☐ Εξάντληση φυσικών πόρων
- ☐ Ηχορύπανση
- ☐ Μείωση βιοποικιλότητας
- ☐ Καταναλωτικές συνήθειες
- ☐ Υποβάθμιση του εδάφους
- ☐ Ξένα/επεμβατικά είδη
- ☐ Πλημμύρες
- ☐ Ρύπανση του νερού

Πόσο σημαντικοί πιστεύετε ότι είναι οι περιβαλλοντικοί παράγοντες στην ανάπτυξη/πρόκληση ασθενειών;

- ☐ Πολύ σημαντικοί
- ☐ Κάπως σημαντικοί
- ☐ Όχι και τόσο σημαντικοί
- ☐ Καθόλου σημαντικοί
- ☐ Δεν γνωρίζω

**Πόσο επικίνδυνες για την υγεία σας πιστεύετε ότι είναι οι παρακάτω περιβαλλοντικές εκθέσεις;**

|                                                | Πολύ σοβαρός κίνδυνος | Κάπως σοβαρός κίνδυνος | Κάπως μικρός κίνδυνος | Καθόλου κίνδυνος      | Δεν γνωρίζω           |
|------------------------------------------------|-----------------------|------------------------|-----------------------|-----------------------|-----------------------|
| Ατμοσφαιρική ρύπανση                           | <input type="radio"/> | <input type="radio"/>  | <input type="radio"/> | <input type="radio"/> | <input type="radio"/> |
| Ρύπανση του νερού                              | <input type="radio"/> | <input type="radio"/>  | <input type="radio"/> | <input type="radio"/> | <input type="radio"/> |
| Χημικά στο νερό και τα τρόφιμα                 | <input type="radio"/> | <input type="radio"/>  | <input type="radio"/> | <input type="radio"/> | <input type="radio"/> |
| (Τοξικά) Απόβλητα                              | <input type="radio"/> | <input type="radio"/>  | <input type="radio"/> | <input type="radio"/> | <input type="radio"/> |
| Καύσωνας                                       | <input type="radio"/> | <input type="radio"/>  | <input type="radio"/> | <input type="radio"/> | <input type="radio"/> |
| Πλημμύρες                                      | <input type="radio"/> | <input type="radio"/>  | <input type="radio"/> | <input type="radio"/> | <input type="radio"/> |
| Λειψυδρία                                      | <input type="radio"/> | <input type="radio"/>  | <input type="radio"/> | <input type="radio"/> | <input type="radio"/> |
| Ρύπανση των αγροτικών περιοχών                 | <input type="radio"/> | <input type="radio"/>  | <input type="radio"/> | <input type="radio"/> | <input type="radio"/> |
| Ηχορύπανση                                     | <input type="radio"/> | <input type="radio"/>  | <input type="radio"/> | <input type="radio"/> | <input type="radio"/> |
| Καταναλωτικές συνήθειες                        | <input type="radio"/> | <input type="radio"/>  | <input type="radio"/> | <input type="radio"/> | <input type="radio"/> |
| Ξένα/επεμβατικά είδη                           | <input type="radio"/> | <input type="radio"/>  | <input type="radio"/> | <input type="radio"/> | <input type="radio"/> |
| Εξάντληση φυσικών πόρων                        | <input type="radio"/> | <input type="radio"/>  | <input type="radio"/> | <input type="radio"/> | <input type="radio"/> |
| Μείωση βιοποικιλότητας                         | <input type="radio"/> | <input type="radio"/>  | <input type="radio"/> | <input type="radio"/> | <input type="radio"/> |
| Υποβάθμιση του εδάφους                         | <input type="radio"/> | <input type="radio"/>  | <input type="radio"/> | <input type="radio"/> | <input type="radio"/> |
| SARS CoV-2 (ιός που προκαλεί τη νόσο COVID-19) | <input type="radio"/> | <input type="radio"/>  | <input type="radio"/> | <input type="radio"/> | <input type="radio"/> |

**Σκεπτόμενος/-η τις ασθένειες του παρακάτω πίνακα, πιστεύετε ότι οι περιβαλλοντικοί παράγοντες παίζουν μεγάλο, μικρό, ή κανένα ρόλο στην εμφάνισή τους;**

|                                                                             | Μεγάλος ρόλος         | Μικρός ρόλος          | Κανέναν ρόλο          | Δεν γνωρίζω           |
|-----------------------------------------------------------------------------|-----------------------|-----------------------|-----------------------|-----------------------|
| Καρκίνος/κακοήθειες σε παιδιά, πχ. λευχαιμία                                | <input type="radio"/> | <input type="radio"/> | <input type="radio"/> | <input type="radio"/> |
| Υπογονιμότητα                                                               | <input type="radio"/> | <input type="radio"/> | <input type="radio"/> | <input type="radio"/> |
| Παιδικό άσθμα                                                               | <input type="radio"/> | <input type="radio"/> | <input type="radio"/> | <input type="radio"/> |
| Αναπνευστικά προβλήματα και αλλεργίες                                       | <input type="radio"/> | <input type="radio"/> | <input type="radio"/> | <input type="radio"/> |
| Γενετικές ανωμαλίες                                                         | <input type="radio"/> | <input type="radio"/> | <input type="radio"/> | <input type="radio"/> |
| Καρκίνος του στήθους                                                        | <input type="radio"/> | <input type="radio"/> | <input type="radio"/> | <input type="radio"/> |
| Υπέρταση                                                                    | <input type="radio"/> | <input type="radio"/> | <input type="radio"/> | <input type="radio"/> |
| Κρύωμα και γρίπη                                                            | <input type="radio"/> | <input type="radio"/> | <input type="radio"/> | <input type="radio"/> |
| Καρκίνος του προστάτη                                                       | <input type="radio"/> | <input type="radio"/> | <input type="radio"/> | <input type="radio"/> |
| Όγκοι του εγκεφάλου                                                         | <input type="radio"/> | <input type="radio"/> | <input type="radio"/> | <input type="radio"/> |
| Άσθμα σε ενήλικες                                                           | <input type="radio"/> | <input type="radio"/> | <input type="radio"/> | <input type="radio"/> |
| Παχυσαρκία                                                                  | <input type="radio"/> | <input type="radio"/> | <input type="radio"/> | <input type="radio"/> |
| Διαβήτης τύπου 2                                                            | <input type="radio"/> | <input type="radio"/> | <input type="radio"/> | <input type="radio"/> |
| Καρκίνος του θυρεοειδούς                                                    | <input type="radio"/> | <input type="radio"/> | <input type="radio"/> | <input type="radio"/> |
| Νοσήματα (π.χ. ελονοσία) που μεταδίδονται μέσω διαβιβαστών (π.χ. κουνούπια) | <input type="radio"/> | <input type="radio"/> | <input type="radio"/> | <input type="radio"/> |
| Άλλες μεταδοτικές ασθένειες όπως ιλαρά, φυματίωση, και ηπατίτιδα            | <input type="radio"/> | <input type="radio"/> | <input type="radio"/> | <input type="radio"/> |
| COVID-19                                                                    | <input type="radio"/> | <input type="radio"/> | <input type="radio"/> | <input type="radio"/> |
| Ασθένειες ψυχικής υγείας (π.χ. κατάθλιψη, άγχος)                            | <input type="radio"/> | <input type="radio"/> | <input type="radio"/> | <input type="radio"/> |

**Κατά τη γνώμη σας, πόσα πράγματα/δράσεις μπορούν να κάνουν πολίτες σαν εσάς για να προστατευτούν από τα παρακάτω:**

|                                                                                                                               | Πολλά πράγματα        | Μερικά πράγματα       | Λίγα πράγματα         | Τίποτα                | Δεν γνωρίζω           |
|-------------------------------------------------------------------------------------------------------------------------------|-----------------------|-----------------------|-----------------------|-----------------------|-----------------------|
| Μεταδοτικές ασθένειες όπως ιλαρά, φυματίωση, COVID-19 και ηπατίτιδα.                                                          | <input type="radio"/> |
| Προβλήματα υγείας που προκαλούνται από περιβαλλοντικούς παράγοντες όπως η κλιματική αλλαγή, η μόλυνση ή τα (τοξικά) απόβλητα. | <input type="radio"/> |



## Πηγές ενημέρωσης

Με ποιους από τους παρακάτω τρόπους/μέσα λαμβάνετε πληροφορίες για περιβαλλοντικούς κινδύνους; Παρακαλούμε επιλέξτε μέχρι 5 τρόπους/μέσα.

- ☐ Μέσα κοινωνικής δικτύωσης (πχ. Facebook) και διαδίκτυο/ίντερνετ
- ☐ Ειδήσεις στην τηλεόραση
- ☐ Ταινίες και ντοκυμαντέρ στην τηλεόραση
- ☐ Συζητήσεις με συγγενείς, την οικογένεια, φίλους, γείτονες κλπ.
- ☐ Εφημερίδες
- ☐ Γιατροί
- ☐ Δημοσιεύσεις, φυλλάδια και άλλο ενημερωτικό υλικό
- ☐ Ραδιόφωνο
- ☐ Περιοδικά
- ☐ Βιβλία
- ☐ Εκδηλώσεις (συνέδρια, εκθέσεις, φεστιβάλ)
- ☐ Πολιτικοί
- ☐ Εκπαιδευτικό υλικό, διαλέξεις και μαθήματα
- ☐ Άλλο

Αν επιλέξατε 'Άλλο', παρακαλούμε προσδιορίστε:

---

**Πόσο αξιόπιστες θεωρείτε τις ακόλουθες πηγές πληροφοριών;**

|                                                                 | Πολύ αξιόπιστη        | Αρκετά αξιόπιστη      | Μέτρια αξιόπιστη      | Λίγο αξιόπιστη        | Καθόλου αξιόπιστη     |
|-----------------------------------------------------------------|-----------------------|-----------------------|-----------------------|-----------------------|-----------------------|
| Μέσα κοινωνικής δικτύωσης (πχ. Facebook) και διαδίκτυο/ίντερνετ | <input type="radio"/> |
| Ειδήσεις στην τηλεόραση                                         | <input type="radio"/> |
| Ταινίες και ντοκυμαντέρ στην τηλεόραση                          | <input type="radio"/> |
| Συζητήσεις με συγγενείς, την οικογένεια, φίλους, γείτονες κλπ.  | <input type="radio"/> |
| Εφημερίδες                                                      | <input type="radio"/> |
| Γιατροί                                                         | <input type="radio"/> |
| Εκπαιδευτικό υλικό, διαλέξεις και μαθήματα                      | <input type="radio"/> |
| Δημοσιεύσεις, φυλλάδια και άλλο ενημερωτικό υλικό               | <input type="radio"/> |
| Ραδιόφωνο                                                       | <input type="radio"/> |
| Περιοδικά                                                       | <input type="radio"/> |
| Βιβλία                                                          | <input type="radio"/> |
| Εκδηλώσεις (συνέδρια, εκθέσεις, φεστιβάλ)                       | <input type="radio"/> |
| Πολιτικοί                                                       | <input type="radio"/> |

**Κάποιοι πολίτες αναφέρουν ότι δεν έχουν αρκετή πληροφόρηση για τα θέματα που διαπραγματεύεται η έρευνα. Εσείς τι πιστεύετε; Έχετε αρκετή πληροφόρηση ή χρειάζεστε παραπάνω πληροφόρηση για τα παρακάτω θέματα;**

|                                                                                                                                      | Ναι, έχω αρκετή πληροφόρηση | Θα ήθελα παραπάνω πληροφόρηση | Όχι δεν θα ήθελα να λαμβάνω αυτές τις πληροφορίες | Δεν γνωρίζω           |
|--------------------------------------------------------------------------------------------------------------------------------------|-----------------------------|-------------------------------|---------------------------------------------------|-----------------------|
| Κατάσταση του περιβάλλοντος στην κοινότητά σας.                                                                                      | <input type="radio"/>       | <input type="radio"/>         | <input type="radio"/>                             | <input type="radio"/> |
| Επιπτώσεις της κλιματικής αλλαγής στον πληθυσμό της Κύπρου.                                                                          | <input type="radio"/>       | <input type="radio"/>         | <input type="radio"/>                             | <input type="radio"/> |
| Τι μπορούμε να κάνουμε για να προστατεύσουμε τους εαυτούς μας και την οικογένειά μας από προβλήματα υγείας σχετικά με το περιβάλλον. | <input type="radio"/>       | <input type="radio"/>         | <input type="radio"/>                             | <input type="radio"/> |
| Τι μπορούμε να κάνουμε για να προστατεύσουμε τους εαυτούς μας και την οικογένειά μας από τις επιπτώσεις της κλιματικής αλλαγής.      | <input type="radio"/>       | <input type="radio"/>         | <input type="radio"/>                             | <input type="radio"/> |

Με ποιους από τους παρακάτω τρόπους/μέσα θέλετε να λαμβάνετε πληροφορίες για περιβαλλοντικούς κινδύνους; Παρακαλούμε επιλέξτε μέχρι 5 τρόπους/μέσα.

- ☐ Μέσα κοινωνικής δικτύωσης (πχ. Facebook) και διαδίκτυο/ίντερνετ
- ☐ Ειδήσεις στην τηλεόραση
- ☐ Ταινίες και ντοκυμαντέρ στην τηλεόραση
- ☐ Συζητήσεις με συγγενείς, την οικογένεια, φίλους, γείτονες κλπ.
- ☐ Εφημερίδες
- ☐ Γιατροί
- ☐ Δημοσιεύσεις, φυλλάδια και άλλο ενημερωτικό υλικό
- ☐ Ραδιόφωνο
- ☐ Περιοδικά
- ☐ Βιβλία
- ☐ Εκδηλώσεις (συνέδρια, εκθέσεις, φεστιβάλ)
- ☐ Πολιτικοί
- ☐ Εκπαιδευτικό υλικό, διαλέξεις και μαθήματα
- ☐ Άλλο

Αν επιλέξατε 'Άλλο', παρακαλούμε προσδιορίστε:

---

**Γενικές πληροφορίες**

Ηλικία:

---

Φύλο:

- ☐ Γυναίκα  
☐ Άνδρας  
☐ Δεν θα ήθελα να απαντήσω

Πώς θα περιγράφατε τον τόπο γέννησής σας;

- ☐ Μεγάλη πόλη  
☐ Προάστιο μεγάλης πόλης  
☐ Μικρή πόλη/Κωμόπολη  
☐ Μη αστική περιοχή (π.χ. χωριό)

Ποιο είναι το υψηλότερο επίπεδο εκπαίδευσης που έχετε ολοκληρώσει με επιτυχία;  
Παρακαλώ περιλάβετε οποιαδήποτε εκπαίδευση πήρατε στα πλαίσια της εργασίας σας.

- ☐ Δεν έχω φοιτήσει ποτέ σε σχολείο  
☐ Δεν έχω τελειώσει το δημοτικό  
☐ Δημοτικό σχολείο  
☐ Γυμνάσιο (3 χρόνια)  
☐ Λύκειο/Τεχνική σχολή (απολυτήριο)  
☐ Μεταλυκειακή εκπαίδευση μη τριτοβάθμια  
☐ Τριτοβάθμια μη Πανεπιστημιακή  
☐ Πανεπιστήμιο (πρώτο πτυχίο)  
☐ Πανεπιστήμιο-Μεταπτυχιακό (μόνο Master's degree)  
☐ Διδακτορικό

Επαγγελματική κατάσταση:

- ☐ Εργαζόμενος/η  
☐ Συνταξιούχος/α  
☐ Μαθητής/τρια  
☐ Δεν εργάζομαι  
☐ Οικιακά  
☐ Εργάζομαι οικιοθελώς

Σε ποια επαρχία μένετε τώρα;

- ☐ Πάφος  
☐ Λεμεσός  
☐ Λευκωσία  
☐ Αμμόχωστος  
☐ Λάρνακα  
☐ Άλλη περιοχή της Κύπρου  
☐ Δεν μένω στην Κύπρο

Πώς θα περιγράφατε την περιοχή στην οποία μένετε;

- ☐ Μεγάλη πόλη  
☐ Προάστιο μεγάλης πόλης  
☐ Μικρή πόλη/Κωμόπολη  
☐ Μη αστική περιοχή (π.χ. χωριό)

---

Πώς θα βαθμολογούσατε την κοινότητα/περιοχή σας σαν μέρος για να ζει κάποιος;

- ☐ Πολύ καλή
- ☐ Κάπως καλή
- ☐ Κάπως κακή
- ☐ Πολύ κακή
- ☐ Δεν γνωρίζω

---

Ποια είναι η οικογενειακή σας κατάσταση;

- ☐ Ανύπαντρος/η
- ☐ Παντρεμένος/η
- ☐ Χωρισμένος/η
- ☐ Χήρος/α

---

Έχετε παιδιά;

- ☐ Ναι
- ☐ Όχι

## Introduction

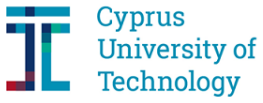

Cyprus  
University of  
Technology

Cyprus International  
Institute for Environmental  
and Public Health

water and  
health  
[laboratory]

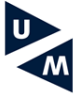

**Maastricht University**

**Perceptions on the  
influence of climate  
change and its  
manifestations on  
human health**

Dear Respondent,

Thank you for your interest in our study!

Cyprus is located in a 'climate hot spot' and is experiencing rapid climate change which is expected to affect our lives and health.

For example, Cyprus experiences more frequent heatwaves and forest fires during the summer and lengthy periods without rain in the winter which threaten water availability. These phenomena are the result of the overall changes in the climate.

Primary objective of the study:

With this study we aim to collect the opinions of people living in Cyprus about how their health might be influenced by climate change and environmental factors.

Environmental factors refer to everything that exists in our surroundings and is not a genetic or biological process in our bodies.

Expected benefit from your participation in the study:

Your answers to a short questionnaire will help us understand how people living in Cyprus perceive the health effects of climate change. With these results we will be able to develop research and evidence-based communication strategies which will help tackle the impacts of the climate crisis.

Important information

Details of any risks that may exist or any inconvenience that participants may incur There are no risks associated with this study. Details of what data will be collected or generated for you within the project, who will have access to them and for how long

Your survey responses will be anonymous and no personally identifiable information will be requested from you. Your anonymity will be ensured throughout the research and during the publication of the results in conferences, scientific journals, etc. The data will be kept in safe areas with access to them only by the research team. The data obtained from the study will be stored in a safe area by the Cyprus International Institute for Environmental and Public Health for 10 years and then will be destroyed. Estimated time to complete the questionnaire is between 8 - 10 minutes. Expected benefit for researchers and/or sponsors The study aims to explore the Cypriot perceptions regarding climate-related health risks. To explore how perceptions have changed over time, this study will compare results with the 2018 survey conducted by the Water and Health Laboratory. Therefore, this study will compare results from two different samples of the same population in two points in time. In addition, these perceptions will be compared by factors, like age, living area, educational level, and self-assessed health. This can portray the differences in perception within a population, which are likely to be found for all four factors. This study is part of a thesis project. Description of relevant procedures in handling the data and personal information of participants who choose to withdraw from the study prior to its completion. Data collection will follow GDPR principles. Survey responses will be anonymous and no personally identifiable information will be requested. Participation in this study is completely voluntary and participants can withdraw from the survey at any point and their personal information will not be stored. This study is conducted by the Cyprus International Institute for Environmental and Public Health in collaboration with the MSc in Global Health at Maastricht University, The Netherlands.

Full contact details and title of the person to whom participants can submit complaints or grievances regarding the programme they participate in. Dr. Charalambos Chrysostomou, Head of Research Services, Cyprus University of Technology Tel. no.: 25002562 Full contact details and title of the person to whom participants can contact for more information or clarifications on the management of personal data. Mrs. Maria Ioannou, Data Protection Officer, Cyprus University of Technology Tel. no.: 25 00 2355 Email: [gdp.dpo@cut.ac.cy](mailto:gdp.dpo@cut.ac.cy) Full contact details and title of the person whom participants can contact for more information or clarifications about the research programme. Sarah Connon, Master student of Global Health program of the Maastricht University of Netherlands Email: [s.connon@student.maastrichtuniversity.nl](mailto:s.connon@student.maastrichtuniversity.nl) Corina Konstantinou, Research Fellow, Water and Health Lab Telephone no.: +357-25002282 Email: [waterandhealthlab@cut.ac.cy](mailto:waterandhealthlab@cut.ac.cy) If you need additional information about the study or about other research activities, please feel free to contact us at the email address: [waterandhealthlab@cut.ac.cy](mailto:waterandhealthlab@cut.ac.cy)

If you agree to answer the questionnaire, check the box at the bottom of the page.

Thank you!

Sarah Connon  
MSc Global Health  
Maastricht University, the Netherlands

Konstantinos C. Makris, PhD  
Associate Professor of Environmental Health

Water and Health Laboratory  
Cyprus International Institute for Environmental and Public Health  
Cyprus University of Technology

☐ I have read and understood all the given information and I would like to proceed to the questionnaire



**Health Assessment**

In general would you say your health is:

- ☐ Excellent
- ☐ Very good
- ☐ Good
- ☐ Average
- ☐ Poor

---

How is your health now compared to one year ago:

- ☐ Much better now than one year ago
- ☐ Somewhat better now than one year ago
- ☐ About the same
- ☐ Somewhat worse than one year ago
- ☐ Much worse than one year ago

**The following items are about activities you might do during a typical day. Does your health now limit you in these activities? If so, how much?**

|                                                                                                 | Yes, limited a lot    | Yes, limited a little | No, not limited at all |
|-------------------------------------------------------------------------------------------------|-----------------------|-----------------------|------------------------|
| Vigorous activities, such as running, lifting heavy objects, participating in strenuous sports  | <input type="radio"/> | <input type="radio"/> | <input type="radio"/>  |
| Moderate activities, such as moving a table, pushing a vacuum cleaner, bowling, or playing golf | <input type="radio"/> | <input type="radio"/> | <input type="radio"/>  |
| Lifting or carrying groceries                                                                   | <input type="radio"/> | <input type="radio"/> | <input type="radio"/>  |
| Climbing several flights of stairs                                                              | <input type="radio"/> | <input type="radio"/> | <input type="radio"/>  |
| Climbing one flight of stairs                                                                   | <input type="radio"/> | <input type="radio"/> | <input type="radio"/>  |
| Bending, kneeling or stooping                                                                   | <input type="radio"/> | <input type="radio"/> | <input type="radio"/>  |
| Walking more than a kilometer                                                                   | <input type="radio"/> | <input type="radio"/> | <input type="radio"/>  |
| Walking several blocks                                                                          | <input type="radio"/> | <input type="radio"/> | <input type="radio"/>  |
| Walking one block                                                                               | <input type="radio"/> | <input type="radio"/> | <input type="radio"/>  |
| Bathing or dressing yourself                                                                    | <input type="radio"/> | <input type="radio"/> | <input type="radio"/>  |

**During the past 4 weeks, have you had any of the following problems with your work or other regular daily activities as a result of your physical health?**

|                                                                                           | Yes                   | No                    |
|-------------------------------------------------------------------------------------------|-----------------------|-----------------------|
| Cut down the amount of time you spent on work or other activities                         | <input type="radio"/> | <input type="radio"/> |
| Accomplished less than you would like                                                     | <input type="radio"/> | <input type="radio"/> |
| Were limited in the kind of work or other activities                                      | <input type="radio"/> | <input type="radio"/> |
| Had difficulty performing the work or other activities (for example it took extra effort) | <input type="radio"/> | <input type="radio"/> |

**During the past 4 weeks, have you had any of the following problems with your work or other regular activities as a result of any emotional problems (such as feeling depressed or anxious)?**

|                                                                   | Yes                   | No                    |
|-------------------------------------------------------------------|-----------------------|-----------------------|
| Cut down the amount of time you spent on work or other activities | <input type="radio"/> | <input type="radio"/> |
| Accomplished less than you would like                             | <input type="radio"/> | <input type="radio"/> |
| Didn't do work or other activities as carefully as usual          | <input type="radio"/> | <input type="radio"/> |

During the past 4 weeks, to what extent has your physical health or emotional problems interfered with your normal social activities with family, friends, neighbours or groups?

- ☐ Not at all
- ☐ Slightly
- ☐ Moderately
- ☐ Quite a bit
- ☐ Extremely

**These questions are about how you feel and how things have been with you during the past 4 weeks. For each question, please give the one answer that comes closest to the way you have been feeling.**

**During the last 4 weeks, how often...**

|                                                                     | All of the time       | Most of the time      | A good bit of the time | Some of the time      | A little of the time  | None of the time      |
|---------------------------------------------------------------------|-----------------------|-----------------------|------------------------|-----------------------|-----------------------|-----------------------|
| Did you feel full of life?                                          | <input type="radio"/> | <input type="radio"/> | <input type="radio"/>  | <input type="radio"/> | <input type="radio"/> | <input type="radio"/> |
| Have you been a very nervous person?                                | <input type="radio"/> | <input type="radio"/> | <input type="radio"/>  | <input type="radio"/> | <input type="radio"/> | <input type="radio"/> |
| Have you felt so down in the dumps that nothing could cheer you up? | <input type="radio"/> | <input type="radio"/> | <input type="radio"/>  | <input type="radio"/> | <input type="radio"/> | <input type="radio"/> |
| Have you felt calm and peaceful?                                    | <input type="radio"/> | <input type="radio"/> | <input type="radio"/>  | <input type="radio"/> | <input type="radio"/> | <input type="radio"/> |
| Did you have a lot of energy?                                       | <input type="radio"/> | <input type="radio"/> | <input type="radio"/>  | <input type="radio"/> | <input type="radio"/> | <input type="radio"/> |
| Have you felt downhearted and blue?                                 | <input type="radio"/> | <input type="radio"/> | <input type="radio"/>  | <input type="radio"/> | <input type="radio"/> | <input type="radio"/> |
| Did you feel worn out?                                              | <input type="radio"/> | <input type="radio"/> | <input type="radio"/>  | <input type="radio"/> | <input type="radio"/> | <input type="radio"/> |
| Have you been a happy person?                                       | <input type="radio"/> | <input type="radio"/> | <input type="radio"/>  | <input type="radio"/> | <input type="radio"/> | <input type="radio"/> |
| Did you feel tired?                                                 | <input type="radio"/> | <input type="radio"/> | <input type="radio"/>  | <input type="radio"/> | <input type="radio"/> | <input type="radio"/> |

During the past 4 weeks, how much of the time has your physical health or emotional problems interfered with your social activities (like visiting with friends, relatives, etc.)?

- ☐ All of the time
- ☐ Most of the time
- ☐ Some of the time
- ☐ A little of the time
- ☐ None of the time

**How TRUE or FALSE is each of the following statements for you?**

|                                                      | Definitely true       | Mostly true           | Don't know            | Mostly false          | Definitely false      |
|------------------------------------------------------|-----------------------|-----------------------|-----------------------|-----------------------|-----------------------|
| I seem to get sick a little easier than other people | <input type="radio"/> |
| I am as healthy as anybody I know                    | <input type="radio"/> |
| I expect my health to get worse                      | <input type="radio"/> |
| My health is excellent                               | <input type="radio"/> |

**Environmental Health Risks**

Do you see evidence of climate change on the planet?

- ☐ Not at all
- ☐ Slightly
- ☐ Moderately
- ☐ Quite a bit
- ☐ Extremely

**With environmental factors in mind, such as climate change, pollution and (toxic) waste, how often do you think will the following health issues occur in 2031 (in 10 years) compared to now, in Cyprus?**

|                                                  | Much more             | Somewhat more         | About the same        | Somewhat less         | Much less             |
|--------------------------------------------------|-----------------------|-----------------------|-----------------------|-----------------------|-----------------------|
| The amount of people with an injury              | <input type="radio"/> |
| The amount of people with asthma                 | <input type="radio"/> |
| The amount of people with cancer                 | <input type="radio"/> |
| The amount of people with obesity                | <input type="radio"/> |
| The amount of people with Type 2 Diabetes        | <input type="radio"/> |
| The amount of people with high blood pressure    | <input type="radio"/> |
| The amount of people with infectious diseases    | <input type="radio"/> |
| The amount of people with mental health problems | <input type="radio"/> |



**To what degree do you think that the following factors are being influenced by climate change?**

|                                   | Extremely influenced  | Quite a bit influenced | Moderately influenced | Slightly influenced   |
|-----------------------------------|-----------------------|------------------------|-----------------------|-----------------------|
| Temperature rise (global warming) | <input type="radio"/> | <input type="radio"/>  | <input type="radio"/> | <input type="radio"/> |
| Extreme weather events            | <input type="radio"/> | <input type="radio"/>  | <input type="radio"/> | <input type="radio"/> |
| Contamination of air              | <input type="radio"/> | <input type="radio"/>  | <input type="radio"/> | <input type="radio"/> |
| Contamination of water            | <input type="radio"/> | <input type="radio"/>  | <input type="radio"/> | <input type="radio"/> |
| Contamination of food             | <input type="radio"/> | <input type="radio"/>  | <input type="radio"/> | <input type="radio"/> |
| Contamination of land             | <input type="radio"/> | <input type="radio"/>  | <input type="radio"/> | <input type="radio"/> |
| Radiation level                   | <input type="radio"/> | <input type="radio"/>  | <input type="radio"/> | <input type="radio"/> |

Choose 5 of the following factors that, in your opinion, have the worst effect on your health.

- ☐ Air pollution
- ☐ Chemicals in water and food
- ☐ Agricultural pollution
- ☐ Noise pollution
- ☐ Consumption habits
- ☐ Invasive species
- ☐ Water pollution
- ☐ Water scarcity
- ☐ (Toxic) waste
- ☐ Exhaustion of natural resources
- ☐ Biodiversity loss
- ☐ Soil degradation
- ☐ Flooding

How important do you think environmental factors are in causing diseases?

- ☐ Very important
- ☐ Somewhat important
- ☐ Not too important
- ☐ Not important at all
- ☐ Don't know

**How dangerous do you think the following environmental exposures are for your health?**

|                                        | Very serious<br>danger | Somewhat<br>serious danger | Somewhat minor<br>danger | No danger at all      | Don't know            |
|----------------------------------------|------------------------|----------------------------|--------------------------|-----------------------|-----------------------|
| Air pollution                          | <input type="radio"/>  | <input type="radio"/>      | <input type="radio"/>    | <input type="radio"/> | <input type="radio"/> |
| Water pollution                        | <input type="radio"/>  | <input type="radio"/>      | <input type="radio"/>    | <input type="radio"/> | <input type="radio"/> |
| Chemicals in water and food            | <input type="radio"/>  | <input type="radio"/>      | <input type="radio"/>    | <input type="radio"/> | <input type="radio"/> |
| (Toxic) waste                          | <input type="radio"/>  | <input type="radio"/>      | <input type="radio"/>    | <input type="radio"/> | <input type="radio"/> |
| Heatwave                               | <input type="radio"/>  | <input type="radio"/>      | <input type="radio"/>    | <input type="radio"/> | <input type="radio"/> |
| Flooding                               | <input type="radio"/>  | <input type="radio"/>      | <input type="radio"/>    | <input type="radio"/> | <input type="radio"/> |
| Water scarcity                         | <input type="radio"/>  | <input type="radio"/>      | <input type="radio"/>    | <input type="radio"/> | <input type="radio"/> |
| Agricultural pollution                 | <input type="radio"/>  | <input type="radio"/>      | <input type="radio"/>    | <input type="radio"/> | <input type="radio"/> |
| Noise pollution                        | <input type="radio"/>  | <input type="radio"/>      | <input type="radio"/>    | <input type="radio"/> | <input type="radio"/> |
| Consumption habits                     | <input type="radio"/>  | <input type="radio"/>      | <input type="radio"/>    | <input type="radio"/> | <input type="radio"/> |
| Invasive species                       | <input type="radio"/>  | <input type="radio"/>      | <input type="radio"/>    | <input type="radio"/> | <input type="radio"/> |
| Exhaustion of natural resources        | <input type="radio"/>  | <input type="radio"/>      | <input type="radio"/>    | <input type="radio"/> | <input type="radio"/> |
| Biodiversity loss                      | <input type="radio"/>  | <input type="radio"/>      | <input type="radio"/>    | <input type="radio"/> | <input type="radio"/> |
| Soil degradation                       | <input type="radio"/>  | <input type="radio"/>      | <input type="radio"/>    | <input type="radio"/> | <input type="radio"/> |
| SARS-CoV-2 (virus causing<br>COVID-19) | <input type="radio"/>  | <input type="radio"/>      | <input type="radio"/>    | <input type="radio"/> | <input type="radio"/> |

**Now thinking of some specific illnesses, do you think environmental factors play a major role, minor role or no role at all in causing the following illnesses?**

|                                                               | Major role            | Minor role            | No role at all        | Don't know            |
|---------------------------------------------------------------|-----------------------|-----------------------|-----------------------|-----------------------|
| Cancer in children, such as leukaemia                         | <input type="radio"/> | <input type="radio"/> | <input type="radio"/> | <input type="radio"/> |
| Infertility                                                   | <input type="radio"/> | <input type="radio"/> | <input type="radio"/> | <input type="radio"/> |
| Asthma in children                                            | <input type="radio"/> | <input type="radio"/> | <input type="radio"/> | <input type="radio"/> |
| Sinus and allergy problems                                    | <input type="radio"/> | <input type="radio"/> | <input type="radio"/> | <input type="radio"/> |
| Birth defects                                                 | <input type="radio"/> | <input type="radio"/> | <input type="radio"/> | <input type="radio"/> |
| Breast cancer                                                 | <input type="radio"/> | <input type="radio"/> | <input type="radio"/> | <input type="radio"/> |
| High blood pressure                                           | <input type="radio"/> | <input type="radio"/> | <input type="radio"/> | <input type="radio"/> |
| Colds and flus                                                | <input type="radio"/> | <input type="radio"/> | <input type="radio"/> | <input type="radio"/> |
| Prostate cancer                                               | <input type="radio"/> | <input type="radio"/> | <input type="radio"/> | <input type="radio"/> |
| Brain tumours                                                 | <input type="radio"/> | <input type="radio"/> | <input type="radio"/> | <input type="radio"/> |
| Asthma in adults                                              | <input type="radio"/> | <input type="radio"/> | <input type="radio"/> | <input type="radio"/> |
| Obesity                                                       | <input type="radio"/> | <input type="radio"/> | <input type="radio"/> | <input type="radio"/> |
| Diabetes type 2                                               | <input type="radio"/> | <input type="radio"/> | <input type="radio"/> | <input type="radio"/> |
| Thyroid cancer                                                | <input type="radio"/> | <input type="radio"/> | <input type="radio"/> | <input type="radio"/> |
| Vector borne diseases, such as malaria and dengue             | <input type="radio"/> | <input type="radio"/> | <input type="radio"/> | <input type="radio"/> |
| Infectious diseases, such as measles, tuberculosis, hepatitis | <input type="radio"/> | <input type="radio"/> | <input type="radio"/> | <input type="radio"/> |
| COVID-19                                                      | <input type="radio"/> | <input type="radio"/> | <input type="radio"/> | <input type="radio"/> |
| Mental health problems such as depression and anxiety         | <input type="radio"/> | <input type="radio"/> | <input type="radio"/> | <input type="radio"/> |

**In your opinion, how much can people like you do to protect yourself from the following?**

|                                                                                                     | A great deal          | Moderate amount       | A little              | Nothing at all        | Don't know            |
|-----------------------------------------------------------------------------------------------------|-----------------------|-----------------------|-----------------------|-----------------------|-----------------------|
| Infectious diseases such as measles, tuberculosis, hepatitis or COVID-19                            | <input type="radio"/> |
| Health problems caused by environmental problems such as climate change, pollution or (toxic) waste | <input type="radio"/> |

**Information Sources**

Choose up to 5 sources of information where you get information about environmental health risks from.

- ☐ Social media and the Internet
- ☐ Television news
- ☐ Films and documentaries on television
- ☐ Conversations with relatives, family, friends, neighbours, etc.
- ☐ Newspapers
- ☐ Medical doctors
- ☐ Education/ lectures/ courses
- ☐ Publications, brochures or information materials
- ☐ The radio
- ☐ Magazines
- ☐ Books
- ☐ Events (conferences, fairs, exhibitions, festivals, etc.)
- ☐ Politicians
- ☐ Other

---

If you chose other, please specify

  

---

**How reliable do you consider the following information sources to be?**

|                                                                    | Extremely<br>reliable | Quite a bit<br>reliable | Moderately<br>reliable | Slightly reliable     | Not at all reliable   |
|--------------------------------------------------------------------|-----------------------|-------------------------|------------------------|-----------------------|-----------------------|
| Social media and the internet                                      | <input type="radio"/> | <input type="radio"/>   | <input type="radio"/>  | <input type="radio"/> | <input type="radio"/> |
| Television news                                                    | <input type="radio"/> | <input type="radio"/>   | <input type="radio"/>  | <input type="radio"/> | <input type="radio"/> |
| Films and documentaries on<br>television                           | <input type="radio"/> | <input type="radio"/>   | <input type="radio"/>  | <input type="radio"/> | <input type="radio"/> |
| Conversations with relatives,<br>family, friends, neighbours, etc. | <input type="radio"/> | <input type="radio"/>   | <input type="radio"/>  | <input type="radio"/> | <input type="radio"/> |
| Newspapers                                                         | <input type="radio"/> | <input type="radio"/>   | <input type="radio"/>  | <input type="radio"/> | <input type="radio"/> |
| Medical doctors                                                    | <input type="radio"/> | <input type="radio"/>   | <input type="radio"/>  | <input type="radio"/> | <input type="radio"/> |
| Education/lectures/courses                                         | <input type="radio"/> | <input type="radio"/>   | <input type="radio"/>  | <input type="radio"/> | <input type="radio"/> |
| Publications, brochures or<br>information materials                | <input type="radio"/> | <input type="radio"/>   | <input type="radio"/>  | <input type="radio"/> | <input type="radio"/> |
| The radio                                                          | <input type="radio"/> | <input type="radio"/>   | <input type="radio"/>  | <input type="radio"/> | <input type="radio"/> |
| Magazines                                                          | <input type="radio"/> | <input type="radio"/>   | <input type="radio"/>  | <input type="radio"/> | <input type="radio"/> |
| Books                                                              | <input type="radio"/> | <input type="radio"/>   | <input type="radio"/>  | <input type="radio"/> | <input type="radio"/> |
| Events (conferences, fairs,<br>exhibitions, festivals, etc.)       | <input type="radio"/> | <input type="radio"/>   | <input type="radio"/>  | <input type="radio"/> | <input type="radio"/> |
| Politicians                                                        | <input type="radio"/> | <input type="radio"/>   | <input type="radio"/>  | <input type="radio"/> | <input type="radio"/> |

**Some people say they do not have enough information about the discussed topics. How about you? Do you have enough information about this or would you like more information?**

|                                                                                              | Yes, I have enough information | No, I would like more information | No, and I don't wish to have more information | Don't know            |
|----------------------------------------------------------------------------------------------|--------------------------------|-----------------------------------|-----------------------------------------------|-----------------------|
| The state of the environment in your community.                                              | <input type="radio"/>          | <input type="radio"/>             | <input type="radio"/>                         | <input type="radio"/> |
| The impact of climate change on the Cypriot population.                                      | <input type="radio"/>          | <input type="radio"/>             | <input type="radio"/>                         | <input type="radio"/> |
| What they can do to protect themselves and their family from environmental health problems.  | <input type="radio"/>          | <input type="radio"/>             | <input type="radio"/>                         | <input type="radio"/> |
| What they can do to protect themselves and their family from consequences of climate change. | <input type="radio"/>          | <input type="radio"/>             | <input type="radio"/>                         | <input type="radio"/> |

Choose up to 5 ways of how you would like to receive information regarding environmental health risks?

- ☐ Social media and the Internet
- ☐ Television news
- ☐ Films and documentaries
- ☐ Conversations with relatives, family, friends, neighbours, etc.
- ☐ Newspapers
- ☐ Medical doctors
- ☐ Education/lectures/courses
- ☐ brochures or information materials
- ☐ The radio
- ☐ Magazines
- ☐ Books
- ☐ Events (conferences, fairs, exhibitions, festivals, etc.)
- ☐ Politicians
- ☐ Other

If you chose other, please specify

---

**General Information**

Age

---

Sex

- ☐ Male  
☐ Female  
☐ Prefer not to say

---

How would you describe your place of birth?

- ☐ Large city  
☐ Suburb near large city  
☐ Small city  
☐ Rural

---

Which is the highest level of education which you have successfully completed? Please include any training that you have received within your work.

- ☐ I have never been to school  
☐ I have not completed Primary School  
☐ Primary School  
☐ Middle School (3 years)  
☐ High School/ Vocational High School (diploma)  
☐ Higher (after high school) non-tertiary Education  
☐ Higher Tertiary Education (non-university)  
☐ University (Bachelor degree)  
☐ University- Postgraduate (Master's Degree)  
☐ PhD

---

Professional Status

- ☐ Employed/ self-employed  
☐ Retired  
☐ Student  
☐ Unemployed/ Out of employment  
☐ Housekeeping

---

Where do you currently live?

- ☐ Paphos district  
☐ Limassol district  
☐ Nicosia district  
☐ Famagusta district  
☐ Lamaca district  
☐ Other district  
☐ Not living in Cyprus

---

How would you describe your place of residence?

- ☐ Large city  
☐ Suburb near large city  
☐ Small city  
☐ Rural



---

How would you rate your community as a place to live?

- ☐ Very good
- ☐ Somewhat good
- ☐ Somewhat bad
- ☐ Very bad
- ☐ Don't know

---

What is your marital status?

- ☐ Unmarried
- ☐ Married
- ☐ Divorced
- ☐ Widowed

---

Do you have children?

- ☐ Yes
- ☐ No
