# Supplementary material
Source: MDPI journal article supplement (https://www.mdpi.com/2225-1154/10/9/129)
Supplement: s1 [file s1]

# Supplementary File

SI\_2

Public perceptions on human health risks of climate change in Cyprus: temporal survey trends (2018 and 2021)

---

## Table of Contents

|                                                                           |    |
|---------------------------------------------------------------------------|----|
| Supplementary tables .....                                                | 3  |
| Details on the development of the survey questionnaire and analysis ..... | 42 |
| CHERRIES Checklist .....                                                  | 43 |

## Supplementary tables

**Table S1.** Regrouping of categorical variables for chi-square test assumption compliance. Only categories that have been modified are presented in the table. Categories that were not affected are not shown.

| Questions                                                                                                                                                                                                | Original categories                                            | Re-grouped categories                                       |
|----------------------------------------------------------------------------------------------------------------------------------------------------------------------------------------------------------|----------------------------------------------------------------|-------------------------------------------------------------|
| In general, would you say your health is                                                                                                                                                                 | Poor<br>Average                                                | Poor or Average                                             |
| Do you see evidence of climate change on the planet?                                                                                                                                                     | Moderately<br>Slightly<br>Not at all                           | Moderately or Slightly or Not at all                        |
| With environmental factors in mind, such as climate change, pollution and (toxic) waste, how often do you think will the following health issues occur in 2031 (in 10 years) compared to now, in Cyprus? | About the same<br>Somewhat less<br>Much less                   | About the same or less                                      |
| To what degree do you think that the following factors are being influenced by climate change?                                                                                                           | Moderately influenced<br>Slightly influenced<br>Not influenced | Moderately, Slightly or Not influenced                      |
| To what degree do you think that the following factors are being influenced by climate change?                                                                                                           | Not too important<br>Not important at all<br>Don't know        | Not too important or Not at all important or Don't know     |
| How dangerous do you think the following environmental exposures are for your health?                                                                                                                    | Somewhat minor danger<br>No danger at all<br>Don't know        | Somewhat minor danger or No danger at all or Don't know     |
| Now thinking of some specific illnesses, do you think environmental factors play a major role, minor role or no role at all in causing the following illnesses?                                          | No role at all<br>Don't know                                   | No role at all or Don't know                                |
| In your opinion, how much can people like you do to protect yourself from the following?                                                                                                                 | Nothing at all<br>Don't know                                   | Nothing at all or Don't know                                |
| How reliable do you consider the following information sources to be?                                                                                                                                    | Quite a bit reliable<br>Extremely reliable                     | Quite a bit reliable or Extremely reliable                  |
| Some people say they do not have enough information about the discussed topics. How about you?<br>Do you have enough information about this or would you like more information?                          | No, and I don't wish to have more information<br>Don't know    | No, and I don't wish to have more information or Don't know |

|                                                                                                                                                     |                                                   |                     |
|-----------------------------------------------------------------------------------------------------------------------------------------------------|---------------------------------------------------|---------------------|
| Which is the highest level of education which you have successfully completed? Please include any training that you have received within your work. | I have never been to school                       | Non-university      |
|                                                                                                                                                     | High School/ Vocational High School (diploma)     |                     |
|                                                                                                                                                     | Higher (after high school) non-tertiary Education |                     |
|                                                                                                                                                     | Higher Tertiary Education (non-university)        | Postgraduate or PhD |
|                                                                                                                                                     | University- Postgraduate (Master's Degree)        |                     |
|                                                                                                                                                     | PhD                                               |                     |

**Table S2.** Perceived evidence of climate change on the planet for the years 2018 and 2021 (Question: "Do you see evidence of climate change on the planet?")

|                                                             | 2018      | 2021      | p-value |
|-------------------------------------------------------------|-----------|-----------|---------|
| Number of responses                                         | 185       | 201       |         |
| <b>Do you see evidence of climate change on the planet?</b> |           |           | 0.200   |
| Extremely                                                   | 78 (42.2) | 98 (48.8) |         |
| Quite a bit                                                 | 79 (42.7) | 68 (33.8) |         |
| Moderately or Slightly or Not at all                        | 28 (15.1) | 35 (17.4) |         |

**Table S3.** Perceived frequency of health issues in 10 years as effect of environmental factors for the years 2018 and 2021 (Question: "With environmental factors in mind such as climate change, pollution and toxic waste how often do you think will the following health issues occur in 10 years compared to now in Cyprus?")

|                                                | 2018       | 2021       | p-value |
|------------------------------------------------|------------|------------|---------|
| Number of responses                            | 185        | 201        |         |
| <b>The amount of people with an injury (%)</b> |            |            | 0.346   |
| Much more                                      | 30 (16.2)  | 28 (13.9)  |         |
| Somewhat more                                  | 73 (39.5)  | 69 (34.3)  |         |
| About the same or less                         | 82 (44.3)  | 104 (51.7) |         |
| <b>The amount of people with asthma (%)</b>    |            |            | 0.889   |
| Much more                                      | 92 (49.7)  | 95 (47.3)  |         |
| Somewhat more                                  | 78 (42.2)  | 89 (44.3)  |         |
| About the same or less                         | 15 (8.1)   | 17 (8.5)   |         |
| <b>The amount of people with cancer (%)</b>    |            |            | 0.331   |
| Much more                                      | 102 (55.1) | 96 (47.8)  |         |
| Somewhat more                                  | 65 (35.1)  | 80 (39.8)  |         |
| About the same or less                         | 18 (9.7)   | 25 (12.4)  |         |
| <b>The amount of people with obesity (%)</b>   |            |            | 0.484   |

|                                                          | 2018      | 2021      | p-value |
|----------------------------------------------------------|-----------|-----------|---------|
| Much more                                                | 60 (32.4) | 74 (36.8) | 0.833   |
| Somewhat more                                            | 78 (42.2) | 73 (36.3) |         |
| About the same or less                                   | 47 (25.4) | 54 (26.9) |         |
| <b>The amount of people with diabetes type 2 (%)</b>     |           |           |         |
| Much more                                                | 55 (29.7) | 62 (30.8) | 0.269   |
| Somewhat more                                            | 81 (43.8) | 82 (40.8) |         |
| About the same or less                                   | 49 (26.5) | 57 (28.4) |         |
| <b>The amount of people with high blood pressure (%)</b> |           |           |         |
| Much more                                                | 72 (38.9) | 65 (32.3) | NA      |
| Somewhat more                                            | 80 (43.2) | 89 (44.3) |         |
| About the same or less                                   | 33 (17.8) | 47 (23.4) |         |
| <b>The amount of people with bad mental health (%)</b>   |           |           |         |
| Much more                                                | NA        | 108 (53)  | NA      |
| Somewhat more                                            | NA        | 65 (32)   |         |
| About the same or less                                   | NA        | 29 (14)   |         |

**Table S4.** Perceived degree of how the following factors are being influenced by climate change for the years 2018 and 2021 (Question: “To what degree do you think that the following factors are being influenced by climate change?”)

|                                              | 2018       | 2021       | p-value |
|----------------------------------------------|------------|------------|---------|
| Number of responses                          | 185        | 201        | 0.941   |
| <b>Temperature rise (global warming) (%)</b> |            |            |         |
| Extremely influenced                         | 141 (76.2) | 146 (77.7) |         |
| Quite a bit influenced                       | 32 (17.3)  | 31 (16.5)  | 0.985   |
| Moderately Slightly or Not influenced        | 12 (6.5)   | 11 (5.9)   |         |
| <b>Extreme weather events (%)</b>            |            |            |         |
| Extremely influenced                         | 137 (74.1) | 139 (73.9) | 0.994   |
| Quite a bit influenced                       | 36 (19.5)  | 36 (19.1)  |         |
| Moderately Slightly or Not influenced        | 12 (6.5)   | 13 (6.9)   |         |
| <b>Contamination of air (%)</b>              |            |            | 0.692   |
| Extremely influenced                         | 122 (65.9) | 125 (66.5) |         |
| Quite a bit influenced                       | 40 (21.6)  | 40 (21.3)  |         |
| Moderately Slightly or Not influenced        | 23 (12.4)  | 23 (12.2)  | 0.692   |
| <b>Contamination of water (%)</b>            |            |            |         |
| Extremely influenced                         | 108 (58.4) | 105 (55.9) |         |
| Quite a bit influenced                       | 45 (24.3)  | 53 (28.2)  | 0.796   |
| Moderately Slightly or Not influenced        | 32 (17.3)  | 30 (16.0)  |         |
| <b>Contamination of food (%)</b>             |            |            |         |
| Extremely influenced                         | 96 (51.9)  | 91 (48.4)  | 0.796   |
| Quite a bit influenced                       | 52 (28.1)  | 57 (30.3)  |         |
| Moderately Slightly or Not influenced        | 37 (20.0)  | 40 (21.3)  |         |

|                                       | 2018       | 2021       | p-value |
|---------------------------------------|------------|------------|---------|
| <b>Contamination of land (%)</b>      |            |            | 0.649   |
| Extremely influenced                  | 101 (54.6) | 109 (58.0) |         |
| Quite a bit influenced                | 50 (27.0)  | 43 (22.9)  |         |
| Moderately Slightly or Not influenced | 34 (18.4)  | 36 (19.1)  |         |
| <b>Radiation level (%)</b>            |            |            | 0.097   |
| Extremely influenced                  | 101 (54.6) | 123 (65.4) |         |
| Quite a bit influenced                | 52 (28.1)  | 42 (22.3)  |         |
| Moderately Slightly or Not influenced | 32 (17.3)  | 23 (12.2)  |         |

**Table S5.** Perceived role of environmental factors in causing illnesses for the years 2018 and 2021 (Question: "Do you think environmental factors play a major role minor role or no role at all in causing the following illnesses?")

|                                                 | 2018       | 2021       | P-value |
|-------------------------------------------------|------------|------------|---------|
| Number of responses                             | 185        | 201        |         |
| <b>Cancer in children, such as leukemia (%)</b> |            |            | 0.188   |
| Major role                                      | 142 (76.8) | 142 (70.6) |         |
| Minor role                                      | 24 (13.0)  | 40 (19.9)  |         |
| No role at all or Don't know                    | 19 (10.3)  | 19 (9.5)   |         |
| <b>Infertility (%)</b>                          |            |            | 0.738   |
| Major role                                      | 93 (50.3)  | 101 (50.2) |         |
| Minor role                                      | 62 (33.5)  | 62 (30.8)  |         |
| No role at all or Don't know                    | 30 (16.2)  | 38 (18.9)  |         |
| <b>Asthma in children (%)</b>                   |            |            | 0.046   |
| Major role                                      | 154 (83.2) | 149 (74.1) |         |
| Minor role                                      | 20 (10.8)  | 40 (19.9)  |         |
| No role at all or Don't know                    | 11 (5.9)   | 12 (6.0)   |         |
| <b>Sinus and allergies problems (%)</b>         |            |            | 0.569   |
| Major role                                      | 164 (88.6) | 172 (85.6) |         |
| Minor role                                      | 16 (8.6)   | 24 (11.9)  |         |
| No role at all or Don't know                    | 5 (2.7)    | 5 (2.5)    |         |
| <b>Birth defects (%)</b>                        |            |            | 0.924   |
| Major role                                      | 98 (53.0)  | 104 (51.7) |         |
| Minor role                                      | 54 (29.2)  | 58 (28.9)  |         |
| No role at all or Don't know                    | 33 (17.8)  | 39 (19.4)  |         |
| <b>Breast cancer (%)</b>                        |            |            | 0.260   |
| Major role                                      | 103 (55.7) | 98 (48.8)  |         |
| Minor role                                      | 43 (23.2)  | 61 (30.3)  |         |
| No role at all or Don't know                    | 39 (21.1)  | 42 (20.9)  |         |
| <b>High blood pressure (%)</b>                  |            |            | 0.458   |
| Major role                                      | 89 (48.1)  | 84 (41.8)  |         |
| Minor role                                      | 66 (35.7)  | 81 (40.3)  |         |
| No role at all or Don't know                    | 30 (16.2)  | 36 (17.9)  |         |
| <b>Colds and flus (%)</b>                       |            |            | 0.529   |

|                                  | 2018       | 2021       | P-value |
|----------------------------------|------------|------------|---------|
| Major role                       | 88 (47.6)  | 85 (42.3)  | 0.239   |
| Minor role                       | 72 (38.9)  | 83 (41.3)  |         |
| No role at all or Don't know     | 25 (13.5)  | 33 (16.4)  |         |
| <b>Prostate cancer (%)</b>       |            |            |         |
| Major role                       | 79 (42.7)  | 82 (40.8)  | 0.052   |
| Minor role                       | 48 (25.9)  | 67 (33.3)  |         |
| No role at all or Don't know     | 58 (31.4)  | 52 (25.9)  |         |
| <b>Brain cancer (%)</b>          |            |            |         |
| Major role                       | 105 (56.8) | 93 (46.3)  | 0.524   |
| Minor role                       | 39 (21.1)  | 63 (31.3)  |         |
| No role at all or Don't know     | 41 (22.2)  | 45 (22.4)  |         |
| <b>Asthma in adults (%)</b>      |            |            |         |
| Major role                       | 145 (78.4) | 149 (74.1) | 0.191   |
| Minor role                       | 27 (14.6)  | 38 (18.9)  |         |
| No role at all or Don't know     | 13 (7.0)   | 14 (7.0)   |         |
| <b>Obesity (%)</b>               |            |            |         |
| Major role                       | 66 (35.7)  | 86 (42.8)  | 0.278   |
| Minor role                       | 68 (36.8)  | 74 (36.8)  |         |
| No role at all or Don't know     | 51 (27.6)  | 41 (20.4)  |         |
| <b>Diabetes type 2 (%)</b>       |            |            |         |
| Major role                       | 77 (41.6)  | 76 (37.8)  | 0.098   |
| Minor role                       | 54 (29.2)  | 74 (36.8)  |         |
| No role at all or Don't know     | 54 (29.2)  | 51 (25.4)  |         |
| <b>Thyroid cancer (%)</b>        |            |            |         |
| Major role                       | 107 (57.8) | 99 (49.3)  | 0.295   |
| Minor role                       | 38 (20.5)  | 60 (29.9)  |         |
| No role at all or Don't know     | 40 (21.6)  | 42 (20.9)  |         |
| <b>Vector borne diseases (%)</b> |            |            |         |
| Major role                       | 116 (62.7) | 112 (55.7) | 0.140   |
| Minor role                       | 46 (24.9)  | 64 (31.8)  |         |
| No role at all or Don't know     | 23 (12.4)  | 25 (12.4)  |         |
| <b>Infectious diseases (%)</b>   |            |            |         |
| Major role                       | 88 (47.6)  | 77 (38.3)  | 0.096   |
| Minor role                       | 53 (28.6)  | 74 (36.8)  |         |
| No role at all or Don't know     | 44 (23.8)  | 50 (24.9)  |         |

**Table S6.** Perceived amount of action for protection against infectious diseases and health problems caused by environmental problems for the years 2018 and 2021 (Question: "In your opinion, how much can people like you do to protect yourself from the following?")

|                                                              | 2018      | 2021      | p-value |
|--------------------------------------------------------------|-----------|-----------|---------|
| Number of responses                                          | 185       | 201       | 0.096   |
| <b>Infectious diseases such as measles, tuberculosis (%)</b> |           |           |         |
| A great deal                                                 | 73 (39.5) | 92 (45.8) |         |

|                                                                                                               | 2018      | 2021      | p-value |
|---------------------------------------------------------------------------------------------------------------|-----------|-----------|---------|
| Moderate amount                                                                                               | 75 (40.5) | 81 (40.3) | 0.273   |
| A little                                                                                                      | 21 (11.4) | 22 (10.9) |         |
| Nothing at all or Don't know                                                                                  | 16 (8.6)  | 6 (3.0)   |         |
| <b>Health problems caused by environmental problems such as climate change, pollution or (toxic)waste (%)</b> |           |           |         |
| A great deal                                                                                                  | 76 (41.1) | 88 (43.8) |         |
| Moderate amount                                                                                               | 49 (26.5) | 63 (31.3) |         |
| A little                                                                                                      | 43 (23.2) | 40 (19.9) |         |
| Nothing at all or Don't know                                                                                  | 17 (9.2)  | 10 (5.0)  |         |

**Table S7.** Perceived importance level of environmental factors in causing diseases for the years 2018 and 2021 (Question: "How important do you think environmental factors are in causing diseases?")

|                                                                                  | 2018       | 2021       | p-value |
|----------------------------------------------------------------------------------|------------|------------|---------|
| Number of responses                                                              | 185        | 201        | 0.674   |
| <b>How important do you think environmental factors are in causing diseases?</b> |            |            |         |
| Very important                                                                   | 149 (80.5) | 155 (77.1) |         |
| Somewhat important                                                               | 30 (16.2)  | 37 (18.4)  |         |
| Not too important or Not at all important or Don't know                          | 6 (3.2)    | 9 (4.5)    |         |

**Table S8.** Perceived danger level of environmental factors for health for the years 2018 and 2021 (Question: "How dangerous do you think the following environmental exposures are for your health?")

|                                                         | 2018       | 2021       | p     |
|---------------------------------------------------------|------------|------------|-------|
| Number of responses                                     | 185        | 201        | 0.154 |
| <b>Air pollution (%)</b>                                |            |            |       |
| Very serious danger                                     | 153 (82.7) | 150 (74.6) |       |
| Somewhat serious danger                                 | 28 (15.1)  | 44 (21.9)  | 0.072 |
| Somewhat minor danger or No danger at all or Don't know | 4 (2.2)    | 7 (3.5)    |       |
| <b>Water pollution (%)</b>                              |            |            |       |
| Very serious danger                                     | 149 (80.5) | 143 (71.1) | 0.138 |
| Somewhat serious danger                                 | 28 (15.1)  | 49 (24.4)  |       |
| Somewhat minor danger or No danger at all or Don't know | 8 (4.3)    | 9 (4.5)    |       |
| <b>Chemicals in water and food (%)</b>                  |            |            | 0.025 |
| Very serious danger                                     | 158 (85.4) | 156 (77.6) |       |
| Somewhat serious danger                                 | 22 (11.9)  | 38 (18.9)  |       |
| Somewhat minor danger or No danger at all or Don't know | 5 (2.7)    | 7 (3.5)    |       |
| <b>(Toxic) waste (%)</b>                                |            |            |       |
| Very serious danger                                     | 154 (83.2) | 144 (71.6) |       |
| Somewhat serious danger                                 | 24 (13.0)  | 43 (21.4)  |       |
| Somewhat minor danger or No danger at all or Don't know | 7 (3.8)    | 14 (7.0)   |       |

|                                                         | 2018       | 2021       | p     |
|---------------------------------------------------------|------------|------------|-------|
| <b>Heatwave (%)</b>                                     |            |            | 0.216 |
| Very serious danger                                     | 73 (39.5)  | 88 (43.8)  |       |
| Somewhat serious danger                                 | 90 (48.6)  | 81 (40.3)  |       |
| Somewhat minor danger or No danger at all or Don't know | 22 (11.9)  | 32 (15.9)  |       |
| <b>Flooding (%)</b>                                     |            |            | 0.726 |
| Very serious danger                                     | 52 (28.1)  | 64 (31.8)  |       |
| Somewhat serious danger                                 | 79 (42.7)  | 81 (40.3)  |       |
| Somewhat minor danger or No danger at all or Don't know | 54 (29.2)  | 56 (27.9)  |       |
| <b>Water scarcity (%)</b>                               |            |            | 0.502 |
| Very serious danger                                     | 99 (53.5)  | 106 (52.7) |       |
| Somewhat serious danger                                 | 68 (36.8)  | 68 (33.8)  |       |
| Somewhat minor danger or No danger at all or Don't know | 18 (9.7)   | 27 (13.4)  |       |
| <b>Agricultural pollution (%)</b>                       |            |            | 0.724 |
| Very serious danger                                     | 112 (60.5) | 119 (59.2) |       |
| Somewhat serious danger                                 | 58 (31.4)  | 69 (34.3)  |       |
| Somewhat minor danger or No danger at all or Don't know | 15 (8.1)   | 13 (6.5)   |       |
| <b>Noise pollution (%)</b>                              |            |            | 0.213 |
| Very serious danger                                     | 45 (24.3)  | 65 (32.3)  |       |
| Somewhat serious danger                                 | 73 (39.5)  | 69 (34.3)  |       |
| Somewhat minor danger or No danger at all or Don't know | 67 (36.2)  | 67 (33.3)  |       |
| <b>Consumption habits (%)</b>                           |            |            | 0.578 |
| Very serious danger                                     | 74 (40.0)  | 91 (45.3)  |       |
| Somewhat serious danger                                 | 70 (37.8)  | 69 (34.3)  |       |
| Somewhat minor danger or No danger at all or Don't know | 41 (22.2)  | 41 (20.4)  |       |
| <b>Invasive species (%)</b>                             |            |            | 0.452 |
| Very serious danger                                     | 37 (20.0)  | 50 (24.9)  |       |
| Somewhat serious danger                                 | 69 (37.3)  | 75 (37.3)  |       |
| Somewhat minor danger or No danger at all or Don't know | 79 (42.7)  | 76 (37.8)  |       |
| <b>Exhaustion of natural resources (%)</b>              |            |            | 0.724 |
| Very serious danger                                     | 98 (53.0)  | 100 (49.8) |       |
| Somewhat serious danger                                 | 64 (34.6)  | 71 (35.3)  |       |
| Somewhat minor danger or No danger at all or Don't know | 23 (12.4)  | 30 (14.9)  |       |
| <b>Biodiversity loss (%)</b>                            |            |            | 0.800 |
| Very serious danger                                     | 87 (47.0)  | 96 (47.8)  |       |
| Somewhat serious danger                                 | 62 (33.5)  | 71 (35.3)  |       |
| Somewhat minor danger or No danger at all or Don't know | 36 (19.5)  | 34 (16.9)  |       |
| <b>Soil degradation (%)</b>                             |            |            | 0.141 |
| Very serious danger                                     | 82 (44.3)  | 93 (46.3)  |       |
| Somewhat serious danger                                 | 75 (40.5)  | 65 (32.3)  |       |
| Somewhat minor danger or No danger at all or Don't know | 28 (15.1)  | 43 (21.4)  |       |
| <b>SARS-CoV-2 (virus causing COVID-19) (%)</b>          |            |            | NA    |
| Very serious danger                                     | NA         | 77 (38)    |       |
| Somewhat serious danger                                 | NA         | 67 (33)    |       |

|                                                         | 2018 | 2021    | p |
|---------------------------------------------------------|------|---------|---|
| Somewhat minor danger or No danger at all or Don't know | NA   | 58 (29) |   |

**Table S9.** Perceived reliability of information sources in 2018 and 2021 (Question: “How reliable do you consider the following information sources to be?”)

|                                                                           | 2018       | 2021       | p-value |
|---------------------------------------------------------------------------|------------|------------|---------|
| Number of responses                                                       | 185        | 201        |         |
| <b>Social media and internet (%)</b>                                      |            |            | 0.001   |
| Extremely reliable or Quite a bit reliable                                | 66 (35.7)  | 37 (18.4)  |         |
| Moderately reliable                                                       | 77 (41.6)  | 95 (47.3)  |         |
| Slightly reliable                                                         | 28 (15.1)  | 45 (22.4)  |         |
| Not at all reliable                                                       | 14 (7.6)   | 24 (11.9)  |         |
| <b>Television news (%)</b>                                                |            |            | 0.003   |
| Extremely reliable or Quite a bit reliable                                | 98 (53.0)  | 70 (34.8)  |         |
| Moderately reliable                                                       | 56 (30.3)  | 79 (39.3)  |         |
| Slightly reliable                                                         | 22 (11.9)  | 33 (16.4)  |         |
| Not at all reliable                                                       | 9 (4.9)    | 19 (9.5)   |         |
| <b>Films and documentaries on television (%)</b>                          |            |            | 0.003   |
| Extremely reliable or Quite a bit reliable                                | 149 (80.5) | 131 (65.2) |         |
| Moderately reliable                                                       | 32 (17.3)  | 55 (27.4)  |         |
| Slightly reliable                                                         | 4 (2.2)    | 10 (5.0)   |         |
| Not at all reliable                                                       | 0 (0.0)    | 5 (2.5)    |         |
| <b>Conversations with relative's family, friends, neighbors, etc. (%)</b> |            |            | 0.125   |
| Extremely reliable or Quite a bit reliable                                | 36 (19.5)  | 25 (12.4)  |         |
| Moderately reliable                                                       | 71 (38.4)  | 88 (43.8)  |         |
| Slightly reliable                                                         | 60 (32.4)  | 59 (29.4)  |         |
| Not at all reliable                                                       | 18 (9.7)   | 29 (14.4)  |         |
| <b>Newspapers (%)</b>                                                     |            |            | 0.350   |
| Extremely reliable or Quite a bit reliable                                | 87 (47.0)  | 79 (39.3)  |         |
| Moderately reliable                                                       | 64 (34.6)  | 82 (40.8)  |         |
| Slightly reliable                                                         | 27 (14.6)  | 28 (13.9)  |         |
| Not at all reliable                                                       | 7 (3.8)    | 12 (6.0)   |         |
| <b>Medical doctors (%)</b>                                                |            |            | 0.328   |
| Extremely reliable or Quite a bit reliable                                | 141 (76.2) | 149 (74.1) |         |
| Moderately reliable                                                       | 33 (17.8)  | 42 (20.9)  |         |
| Slightly reliable                                                         | 10 (5.4)   | 6 (3.0)    |         |
| Not at all reliable                                                       | 1 (0.5)    | 4 (2.0)    |         |
| <b>Education/Lectures/Courses (%)</b>                                     |            |            | 0.258   |
| Extremely reliable or Quite a bit reliable                                | 165 (89.2) | 170 (84.6) |         |
| Moderately reliable                                                       | 15 (8.1)   | 26 (12.9)  |         |
| Slightly reliable                                                         | 4 (2.2)    | 2 (1.0)    |         |
| Not at all reliable                                                       | 1 (0.5)    | 3 (1.5)    |         |
| <b>Publications, brochures or information materials (%)</b>               |            |            | 0.228   |

|                                                                      | 2018       | 2021       | p-value |
|----------------------------------------------------------------------|------------|------------|---------|
| Extremely reliable or Quite a bit reliable                           | 145 (78.4) | 141 (70.1) | 0.129   |
| Moderately reliable                                                  | 29 (15.7)  | 47 (23.4)  |         |
| Slightly reliable                                                    | 9 (4.9)    | 9 (4.5)    |         |
| Not at all reliable                                                  | 2 (1.1)    | 4 (2.0)    |         |
| <b>The radio (%)</b>                                                 |            |            |         |
| Extremely reliable or Quite a bit reliable                           | 85 (45.9)  | 69 (34.3)  | 0.053   |
| Moderately reliable                                                  | 70 (37.8)  | 96 (47.8)  |         |
| Slightly reliable                                                    | 21 (11.4)  | 26 (12.9)  |         |
| Not at all reliable                                                  | 9 (4.9)    | 10 (5.0)   |         |
| <b>Magazines (%)</b>                                                 |            |            |         |
| Extremely reliable or Quite a bit reliable                           | 71 (38.4)  | 51 (25.4)  | 0.218   |
| Moderately reliable                                                  | 73 (39.5)  | 97 (48.3)  |         |
| Slightly reliable                                                    | 30 (16.2)  | 37 (18.4)  |         |
| Not at all reliable                                                  | 11 (5.9)   | 16 (8.0)   |         |
| <b>Books (%)</b>                                                     |            |            |         |
| Extremely reliable or Quite a bit reliable                           | 161 (87.0) | 161 (80.1) | 0.899   |
| Moderately reliable                                                  | 20 (10.8)  | 35 (17.4)  |         |
| Slightly reliable                                                    | 4 (2.2)    | 4 (2.0)    |         |
| Not at all reliable                                                  | 0 (0.0)    | 1 (0.5)    |         |
| <b>Events (Conferences, fairs, exhibitions, festivals, etc.) (%)</b> |            |            |         |
| Extremely reliable or Quite a bit reliable                           | 146 (78.9) | 157 (78.1) | 0.307   |
| Moderately reliable                                                  | 31 (16.8)  | 35 (17.4)  |         |
| Slightly reliable                                                    | 3 (1.6)    | 5 (2.5)    |         |
| Not at all reliable                                                  | 5 (2.7)    | 4 (2.0)    |         |
| <b>Politicians (%)</b>                                               |            |            |         |
| Extremely reliable or Quite a bit reliable                           | 12 (6.5)   | 12 (6.0)   | 0.307   |
| Moderately reliable                                                  | 31 (16.8)  | 48 (23.9)  |         |
| Slightly reliable                                                    | 55 (29.7)  | 61 (30.3)  |         |
| Not at all reliable                                                  | 87 (47.0)  | 80 (39.8)  |         |

**Table S10.** Perceived information availability for the state of the environment in community, the climate change impact on the Cypriot population and the protection from consequences of climate change in 2018 and 2021 (Question: "Do you have enough information about the following topics or would you like more information?")

|                                                                   | 2018       | 2021       | p value* |
|-------------------------------------------------------------------|------------|------------|----------|
| Number of responses                                               | 185        | 201        |          |
| <b>The state of the environment in your community (%)</b>         |            |            | 0.035    |
| Yes, I have enough information                                    | 24 (13.0)  | 34 (16.9)  |          |
| No, I would like more information                                 | 157 (84.9) | 153 (76.1) |          |
| No, and I don't wish to have more information or don't know       | 4 (2.2)    | 14 (7.0)   |          |
| <b>The impact of climate change on the Cypriot population (%)</b> |            |            | 0.246    |
| Yes, I have enough information                                    | 18 (9.7)   | 26 (12.9)  |          |
| No, I would like more information                                 | 161 (87.0) | 163 (81.1) |          |

|                                                                                                        | 2018       | 2021       | p value* |
|--------------------------------------------------------------------------------------------------------|------------|------------|----------|
| No, and I don't wish to have more information or don't know                                            | 6 (3.2)    | 12 (6.0)   | 0.095    |
| <b>What they can do to protect themselves and their family from environmental health problems (%)</b>  |            |            |          |
| Yes, I have enough information                                                                         | 19 (10.3)  | 30 (14.9)  |          |
| No, I would like more information                                                                      | 161 (87.0) | 159 (79.1) | 0.065    |
| No, and I don't wish to have more information or don't know                                            | 5 (2.7)    | 12 (6.0)   |          |
| <b>What they can do to protect themselves and their family from consequences of climate change (%)</b> |            |            |          |
| Yes, I have enough information                                                                         | 16 (8.6)   | 30 (14.9)  | 0.065    |
| No, I would like more information                                                                      | 162 (87.6) | 158 (78.6) |          |
| No, and I don't wish to have more information or don't know                                            | 7 (3.8)    | 13 (6.5)   |          |

**Table S11.** Preference on information sources future use to receive information regarding environmental health risks in 2018 and 2021 (Question: "Choose up to 5 ways of how you would like to receive information regarding environmental health risks").

| Sources of information                                          | 2018<br>N (%) | 2021<br>N (%) |
|-----------------------------------------------------------------|---------------|---------------|
| Social media and the Internet                                   | 133 (72)      | 137 (68)      |
| Television news                                                 | 103 (56)      | 108 (55)      |
| Publications, brochures or information materials                | 100 (54)      | 62 (31)       |
| Education / Lectures / Courses                                  | 94 (51)       | 98 (49)       |
| Films and documentaries on television                           | 93 (50)       | 102 (51)      |
| Events (conferences, fairs exhibitions, festivals, etc.)        | 80 (43)       | 22 (11)       |
| Newspapers                                                      | 52 (28)       | 53 (26)       |
| Radio                                                           | 50 (27)       | 21 (10)       |
| Medical doctors                                                 | 48 (26)       | 76 (38)       |
| Books                                                           | 29 (16)       | 22 (11)       |
| Conversations with relatives, family, friends, neighbours, etc. | 20 (11)       | 30 (15)       |
| Magazines                                                       | 17 (9)        | 50 (25)       |
| Politicians                                                     | 6 (3)         | 108 (54)      |
| Other                                                           | 8 (4)         | 6 (3)         |

**Table S12.** Self-assessed health for years 2018 and 2021 (Question: "In general, would you say your health is")

|                     | 2018 | 2021 | p-value |
|---------------------|------|------|---------|
| Number of responses | 185  | 201  |         |

|                          | 2018       | 2021      | p-value |
|--------------------------|------------|-----------|---------|
| <b>Health status (%)</b> |            |           | 0.105   |
| Excellent                | 46 (24.9)  | 68 (33.8) |         |
| Very good                | 105 (56.8) | 99 (49.3) |         |
| Good                     | 25 (13.5)  | 30 (14.9) |         |
| Poor or Average          | 9 (4.9)    | 4 (2.0)   |         |

**Table S13.** Self-assessed health scales characteristics for years 2018 and 2021

|                                                   | Mean<br>(SD)  | Score<br>Cronbach's<br>alpha | Mean Score<br>(SD) | Cronbach's<br>alpha |
|---------------------------------------------------|---------------|------------------------------|--------------------|---------------------|
| Scale (no. of items)                              | 2018          | 2018                         | 2021               | 2021                |
| Physical functioning (10)                         | 88.4 (17.3)   | 0.89                         | 92.95 (11.7)       | 0.84                |
| Role limitations<br>due to physical health (4)    | 77.6 (33.4)   | 0.82                         | 81.31 (31.5)       | 0.82                |
| Role limitations<br>due to emotional problems (3) | 69.6 (37.3)   | 0.74                         | 66.50 (41.7)       | 0.86                |
| Energy/fatigue (4)                                | 53.8 (19.8)   | 0.76                         | 54.61 (19.4)       | 0.79                |
| Emotional well-being (5)                          | 63.1 (19.2)   | 0.85                         | 60.42 (20.0)       | 0.84                |
| Social functioning (2)                            | 75.5 (24.2)   | 0.84                         | 74.88 (22.8)       | 0.70                |
| General health (5)                                | 67.19 (17.92) | 0.78                         | 70.30 (16.5)       | 0.71                |
| Health change (1)                                 | 52.3 (16.6)   | -                            | 55.07 (18.9)       | -                   |

**Table S14.** Perceived evidence of climate change on the planet by male and female for the years 2018 and 2021

|                                                                     | Female<br>2021 | Male<br>2021 | p-value | Female<br>2018 | Male<br>2018 | p-value |
|---------------------------------------------------------------------|----------------|--------------|---------|----------------|--------------|---------|
| Number of responses                                                 | 124            | 77           |         | 101            | 84           |         |
| <b>Do you see evidence of<br/>climate change on the<br/>planet?</b> |                |              | 0.008   |                |              | 0.032   |
| Extremely                                                           | 70 (56.5)      | 28 (36.4)    |         | 45 (44.6)      | 34 (40.5)    |         |
| Quite a bit                                                         | 39 (31.5)      | 29 (37.7)    |         | 47 (46.5)      | 31 (36.9)    |         |
| Moderately or Slightly<br>or Not at all                             | 15 (12.1)      | 20 (26.0)    |         | 9 (8.9)        | 19 (22.6)    |         |

**Table S15.** Perceived importance level of environmental factors in causing diseases by male and female for the years 2018 and 2021

|                     | Female<br>2021 | Male<br>2021 | p-value | Female<br>2018 | Male<br>2018 | p-value |
|---------------------|----------------|--------------|---------|----------------|--------------|---------|
| Number of responses | 124            | 77           |         | 101            | 84           |         |

|                                                                                  | Female     | Male      | p-value | Female    | Male      | p-value |
|----------------------------------------------------------------------------------|------------|-----------|---------|-----------|-----------|---------|
|                                                                                  | 2021       | 2021      |         | 2018      | 2018      |         |
| <b>How important do you think environmental factors are in causing diseases?</b> |            |           | 0.001   |           |           | <0.001  |
| Very important                                                                   | 106 (85.5) | 49 (63.6) |         | 91 (90.1) | 58 (69.0) |         |
| Somewhat important                                                               | 16 (12.9)  | 21 (27.3) |         | 10 (9.9)  | 20 (23.8) |         |
| Not too important or Don't know                                                  | 2 (1.6)    | 7 (9.1)   |         | 0 (0.0)   | 6 (7.1)   |         |

**Table S16.** Perceived role of environmental factors in causing illnesses by male and female for the years 2018 and 2021

|                                                 | Female    | Male      | p-value | Female    | Male      | p-value |
|-------------------------------------------------|-----------|-----------|---------|-----------|-----------|---------|
|                                                 | 2021      | 2021      |         | 2018      | 2018      |         |
| Number of responses                             | 124       | 77        |         | 101       | 84        |         |
| <b>Cancer in children, such as leukemia (%)</b> |           |           | 0.024   |           |           | 0.009   |
| Major role                                      | 96 (77.4) | 46 (59.7) |         | 86 (85.1) | 56 (66.7) |         |
| Minor role                                      | 18 (14.5) | 22 (28.6) |         | 7 ( 6.9)  | 17 (20.2) |         |
| No role at all or Don't know                    | 10 (8.1)  | 9 (11.7)  |         | 8 ( 7.9)  | 11 (13.1) |         |
| <b>Infertility (%)</b>                          |           |           | 0.254   |           |           | 0.050   |
| Major role                                      | 68 (54.8) | 33 (42.9) |         | 59 (58.4) | 34 (40.5) |         |
| Minor role                                      | 35 (28.2) | 27 (35.1) |         | 29 (28.7) | 33 (40.5) |         |
| No role at all or Don't know                    | 21 (16.9) | 17 (22.1) |         | 13 (12.9) | 17 (20.2) |         |
| <b>Asthma in children (%)</b>                   |           |           | 0.382   |           |           | 0.512   |

|                                         | Female<br>2021 | Male<br>2021 | p-<br>value | Female<br>2018 | Male<br>2018 | p-<br>value |
|-----------------------------------------|----------------|--------------|-------------|----------------|--------------|-------------|
| Major role                              | 96 (77.4)      | 53 (68.8)    |             | 87 (86.1)      | 67 (79.8)    |             |
| Minor role                              | 22 (17.7)      | 18 (23.4)    |             | 9 ( 8.9)       | 11 (13.1)    |             |
| No role at all or Don't know            | 6 (4.8)        | 6 (7.8)      |             | 5 (5.0)        | 6 (7.1)      |             |
| <b>Sinus and allergies problems (%)</b> |                |              | 0.006       |                |              | <0.001      |
| Major role                              | 112 (90.3)     | 60 (77.9)    |             | 98 (97.0)      | 66 (78.6)    |             |
| Minor role                              | 12 (9.7)       | 12 (15.6)    |             | 2 ( 2.0)       | 14 (16.7)    |             |
| No role at all or Don't know            | 0 (0.0)        | 5 (6.5)      |             | 1 (1.0)        | 4 (4.8)      |             |
| <b>Birth defects (%)</b>                |                |              | 0.007       |                |              | 0.080       |
| Major role                              | 74 (59.7)      | 30 (39.0)    |             | 61 (60.4)      | 37 (44.0)    |             |
| Minor role                              | 33 (26.6)      | 25 (32.5)    |             | 24 (23.8)      | 30 (35.7)    |             |
| No role at all or Don't know            | 17 (13.7)      | 22 (28.6)    |             | 16 (15.8)      | 17 (20.2)    |             |
| <b>Breast cancer (%)</b>                |                |              | 0.001       |                |              | 0.021       |
| Major role                              | 73 (58.9)      | 25 (32.5)    |             | 65 (64.4)      | 38 (45.2)    |             |
| Minor role                              | 30 (24.2)      | 31 (40.3)    |             | 21 (20.8)      | 22 (26.2)    |             |
| No role at all or Don't know            | 21 (16.9)      | 21 (27.3)    |             | 15 (14.9)      | 24 (28.6)    |             |
| <b>High blood pressure (%)</b>          |                |              | 0.050       |                |              | 0.096       |
| Major role                              | 59 (47.6)      | 25 (32.5)    |             | 55 (54.5)      | 34 (40.5)    |             |
| Minor role                              | 48 (38.7)      | 33 (42.9)    |             | 34 (33.7)      | 32 (38.1)    |             |
| No role at all or Don't know            | 17 (13.7)      | 19 (24.7)    |             | 12 (11.9)      | 18 (21.4)    |             |
| <b>Colds and flus (%)</b>               |                |              | 0.001       |                |              | 0.111       |
| Major role                              | 59 (47.6)      | 26 (33.8)    |             | 55 (54.5)      | 33 (39.3)    |             |
| Minor role                              | 54 (43.5)      | 29 (37.7)    |             | 35 (34.7)      | 37 (44.0)    |             |
| No role at all or Don't know            | 11 (8.9)       | 22 (28.6)    |             | 11 (10.9)      | 14 (16.7)    |             |
| <b>Prostate cancer (%)</b>              |                |              | 0.003       |                |              | <0.001      |

|                                  | Female<br>2021 | Male<br>2021 | p-<br>value | Female<br>2018 | Male<br>2018 | p-<br>value |
|----------------------------------|----------------|--------------|-------------|----------------|--------------|-------------|
| Major role                       | 62 (50.0)      | 20 (26.0)    |             | 58 (57.4)      | 21 (25.0)    |             |
| Minor role                       | 36 (29.0)      | 31 (40.3)    |             | 19 (18.8)      | 29 (34.5)    |             |
| No role at all or Don't know     | 26 (21.0)      | 26 (33.8)    |             | 24 (23.8)      | 34 (40.5)    |             |
| <b>Brain cancer (%)</b>          |                |              | 0.001       |                |              | 0.015       |
| Major role                       | 70 (56.5)      | 23 (29.9)    |             | 67 (66.3)      | 38 (45.2)    |             |
| Minor role                       | 32 (25.8)      | 31 (40.3)    |             | 17 (16.8)      | 22 (26.2)    |             |
| No role at all or Don't know     | 22 (17.7)      | 23 (29.9)    |             | 17 (16.8)      | 24 (28.6)    |             |
| <b>Asthma in adults (%)</b>      |                |              | <0.001      |                |              | 0.096       |
| Major role                       | 104 (83.9)     | 45 (58.4)    |             | 85 (84.2)      | 60 (71.4)    |             |
| Minor role                       | 15 (12.1)      | 23 (29.9)    |             | 10 ( 9.9)      | 17 (20.2)    |             |
| No role at all or Don't know     | 5 (4.0)        | 9 (11.7)     |             | 6 (5.9)        | 7 (8.3)      |             |
| <b>Obesity (%)</b>               |                |              | 0.004       |                |              | 0.014       |
| Major role                       | 62 (50.0)      | 24 (31.2)    |             | 40 (39.6)      | 26 (31.0)    |             |
| Minor role                       | 45 (36.3)      | 29 (37.7)    |             | 42 (41.6)      | 26 (31.0)    |             |
| No role at all or Don't know     | 17 (13.7)      | 24 (31.2)    |             | 19 (18.8)      | 32 (38.1)    |             |
| <b>Diabetes type 2 (%)</b>       |                |              | 0.005       |                |              | 0.036       |
| Major role                       | 57 (46.0)      | 19 (24.7)    |             | 50 (49.5)      | 27 (32.1)    |             |
| Minor role                       | 43 (34.7)      | 31 (40.3)    |             | 28 (27.7)      | 26 (31.0)    |             |
| No role at all or Don't know     | 24 (19.4)      | 27 (35.1)    |             | 23 (22.8)      | 31 (36.9)    |             |
| <b>Thyroid cancer (%)</b>        |                |              | 0.006       |                |              | 0.036       |
| Major role                       | 72 (58.1)      | 27 (35.1)    |             | 67 (66.3)      | 40 (47.6)    |             |
| Minor role                       | 30 (24.2)      | 30 (39.0)    |             | 17 (16.8)      | 21 (25.0)    |             |
| No role at all or Don't know     | 22 (17.7)      | 20 (26.0)    |             | 17 (16.8)      | 23 (27.4)    |             |
| <b>Vector borne diseases (%)</b> |                |              | <0.001      |                |              | <0.001      |

|                                                                  | Female<br>2021 | Male<br>2021 | p-<br>value | Female<br>2018 | Male<br>2018 | p-<br>value |
|------------------------------------------------------------------|----------------|--------------|-------------|----------------|--------------|-------------|
| Major role                                                       | 80 (64.5)      | 32 (41.6)    |             | 78 (77.2)      | 38 (45.2)    |             |
| Minor role                                                       | 37 (29.8)      | 27 (35.1)    |             | 15 (14.9)      | 31 (36.9)    |             |
| No role at all or Don't know                                     | 7 (5.6)        | 18 (23.4)    |             | 8 (7.9)        | 15 (36.9)    |             |
| <b>Infectious diseases (%)</b>                                   |                |              | <0.001      |                |              | 0.004       |
| Major role                                                       | 58 (46.8)      | 19 (24.7)    |             | 59 (58.4)      | 29 (34.5)    |             |
| Minor role                                                       | 46 (37.1)      | 28 (36.4)    |             | 25 (24.8)      | 28 (33.3)    |             |
| No role at all or Don't know                                     | 20 (16.1)      | 30 (39.0)    |             | 17 (16.8)      | 27 (32.1)    |             |
| <b>COVID-19 (%)</b>                                              |                |              | 0.125       |                |              |             |
| Major role                                                       | 51 (41.1)      | 26 (33.8)    |             |                |              |             |
| Minor role                                                       | 43 (34.7)      | 22 (28.6)    |             |                |              |             |
| No role at all or Don't know                                     | 30 (24.2)      | 29 (37.7)    |             |                |              |             |
| <b>Mental health problems such as depression and anxiety (%)</b> |                |              | 0.002       |                |              |             |
| Major role                                                       | 84 (67.7)      | 37 (48.1)    |             |                |              |             |
| Minor role                                                       | 35 (28.2)      | 27 (35.1)    |             |                |              |             |
| No role at all or Don't know                                     | 5 (4.0)        | 13 (16.9)    |             |                |              |             |

**Table S17.** Perceived importance level of environmental factors in causing diseases by education level for the year 2021

|                                                             | Non-<br>university | University (Bachelor's<br>degree) | Postgraduate or<br>PhD | p-<br>value |
|-------------------------------------------------------------|--------------------|-----------------------------------|------------------------|-------------|
| Number of responses                                         | 40                 | 58                                | 103                    |             |
| <b>Do you see evidence of climate change on the planet?</b> |                    |                                   |                        | 0.085       |
| Extremely                                                   | 17 (42.5)          | 25 (43.1)                         | 56 (54.4)              |             |
| Quite a bit                                                 | 15 (37.5)          | 17 (29.3)                         | 36 (35.0)              |             |

|                                      | Non-university | University (Bachelor's degree) | Postgraduate or PhD | p-value |
|--------------------------------------|----------------|--------------------------------|---------------------|---------|
| Moderately or Slightly or Not at all | 8 (20.0)       | 16 (27.6)                      | 11 (10.7)           |         |

**Table S18.** Perceived frequency of health issues in 10 years as effect of environmental factors by educational level for 2021.

|                                                          | Non-university | University (Bachelor's degree) | Postgraduate or PhD | p-value |
|----------------------------------------------------------|----------------|--------------------------------|---------------------|---------|
| Number of responses                                      | 40             | 58                             | 103                 |         |
| <b>The amount of people with an injury (%)</b>           |                |                                |                     | 0.400   |
| Much more                                                | 7 (17.5)       | 8 (13.8)                       | 13 (12.6)           |         |
| Somewhat more                                            | 9 (22.5)       | 24 (41.4)                      | 36 (35.0)           |         |
| About the same or less                                   | 24 (60.0)      | 26 (44.8)                      | 54 (52.4)           |         |
| <b>The amount of people with asthma (%)</b>              |                |                                |                     | 0.405   |
| Much more                                                | 23 (57.5)      | 22 (37.9)                      | 50 (48.5)           |         |
| Somewhat more                                            | 15 (37.5)      | 30 (51.7)                      | 44 (42.7)           |         |
| About the same or less                                   | 2 (5.0)        | 6 (10.3)                       | 9 (8.7)             |         |
| <b>The amount of people with cancer (%)</b>              |                |                                |                     | 0.393   |
| Much more                                                | 24 (60.0)      | 26 (44.8)                      | 46 (44.7)           |         |
| Somewhat more                                            | 14 (35.0)      | 24 (41.4)                      | 42 (40.8)           |         |
| About the same or less                                   | 2 (5.0)        | 8 (13.8)                       | 15 (14.6)           |         |
| <b>The amount of people with obesity (%)</b>             |                |                                |                     | 0.829   |
| Much more                                                | 16 (40.0)      | 23 (39.7)                      | 35 (34.0)           |         |
| Somewhat more                                            | 12 (30.0)      | 20 (34.5)                      | 41 (39.8)           |         |
| About the same or less                                   | 12 (30.0)      | 15 (25.9)                      | 27 (26.2)           |         |
| <b>The amount of people with diabetes type 2 (%)</b>     |                |                                |                     | 0.714   |
| Much more                                                | 13 (32.5)      | 18 (31.0)                      | 31 (30.1)           |         |
| Somewhat more                                            | 13 (32.5)      | 23 (39.7)                      | 46 (44.7)           |         |
| About the same or less                                   | 14 (35.0)      | 17 (29.3)                      | 26 (25.2)           |         |
| <b>The amount of people with high blood pressure (%)</b> |                |                                |                     | 0.545   |
| Much more                                                | 14 (35.0)      | 14 (24.1)                      | 37 (35.9)           |         |
| Somewhat more                                            | 18 (45.0)      | 27 (46.6)                      | 44 (42.7)           |         |
| About the same or less                                   | 8 (20.0)       | 17 (29.3)                      | 22 (21.4)           |         |
| <b>The amount of people with infectious disease (%)</b>  |                |                                |                     | 0.364   |
| Much more                                                | 17 (42.5)      | 23 (39.7)                      | 42 (40.8)           |         |
| Somewhat more                                            | 11 (27.5)      | 26 (44.8)                      | 37 (35.9)           |         |
| About the same or less                                   | 12 (30.0)      | 9 (15.5)                       | 24 (23.3)           |         |

|                                                             | Non-university | University (Bachelor's degree) | Postgraduate or PhD | p-value |
|-------------------------------------------------------------|----------------|--------------------------------|---------------------|---------|
| <b>The amount of people with mental health problems (%)</b> |                |                                |                     | 0.966   |
| Much more                                                   | 21 (52.5)      | 32 (55.2)                      | 55 (53.4)           |         |
| Somewhat more                                               | 14 (35.0)      | 19 (32.8)                      | 32 (31.1)           |         |
| About the same or less                                      | 5 (12.5)       | 7 (12.1)                       | 16 (15.5)           |         |

**Table S19.** Perceived degree of how the following factors are being influenced by climate change by education level for the year 2021

|                                              | Non-university | University (Bachelor degree) | Postgraduate or PhD | p-value |
|----------------------------------------------|----------------|------------------------------|---------------------|---------|
| Number of responses                          | 40             | 58                           | 103                 |         |
| <b>Temperature rise (global warming) (%)</b> |                |                              |                     | 0.105   |
| Extremely influenced                         | 29 (72.5)      | 41 (73.2)                    | 76 (82.6)           |         |
| Quite a bit influenced                       | 7 (17.5)       | 14 (25.0)                    | 10 (10.9)           |         |
| Moderately Slightly or Not influenced        | 4 (10.0)       | 1 (1.8)                      | 6 (6.5)             |         |
| <b>Extreme weather events(%)</b>             |                |                              |                     | 0.079   |
| Extremely influenced                         | 29 (72.5)      | 37 (66.1)                    | 73 (79.3)           |         |
| Quite a bit influenced                       | 8 (20.0)       | 17 (30.4)                    | 11 (12.0)           |         |
| Moderately Slightly or Not influenced        | 3 (7.5)        | 2 (3.6)                      | 8 (8.7)             |         |
| <b>Contamination of air (%)</b>              |                |                              |                     | 0.803   |
| Extremely influenced                         | 27 (67.5)      | 38 (67.9)                    | 60 (65.2)           |         |
| Quite a bit influenced                       | 9 (22.5)       | 13 (23.2)                    | 18 (19.6)           |         |
| Moderately Slightly or Not influenced        | 4 (10.0)       | 5 (8.9)                      | 14 (15.2)           |         |
| <b>Contamination of water (%)</b>            |                |                              |                     | 0.952   |
| Extremely influenced                         | 24 (60.0)      | 31 (55.4)                    | 50 (54.3)           |         |
| Quite a bit influenced                       | 10 (25.0)      | 15 (26.8)                    | 28 (30.4)           |         |
| Moderately Slightly or Not influenced        | 6 (15.0)       | 10 (17.9)                    | 14 (15.2)           |         |
| <b>Contamination of food (%)</b>             |                |                              |                     | 0.993   |
| Extremely influenced                         | 19 (47.5)      | 26 (46.4)                    | 46 (50.0)           |         |
| Quite a bit influenced                       | 12 (30.0)      | 18 (32.1)                    | 27 (29.3)           |         |
| Moderately Slightly or Not influenced        | 9 (22.5)       | 12 (21.4)                    | 19 (20.7)           |         |
| <b>Contamination of land (%)</b>             |                |                              |                     | 0.833   |
| Extremely influenced                         | 23 (57.5)      | 31 (55.4)                    | 55 (59.8)           |         |
| Quite a bit influenced                       | 11 (27.5)      | 12 (21.4)                    | 20 (21.7)           |         |
| Moderately Slightly or Not influenced        | 6 (15.0)       | 13 (23.2)                    | 17 (18.5)           |         |
| <b>Radiation level (%)</b>                   |                |                              |                     | 0.913   |
| Extremely influenced                         | 28 (70.0)      | 34 (60.7)                    | 61 (66.3)           |         |
| Quite a bit influenced                       | 8 (20.0)       | 14 (25.0)                    | 20 (21.7)           |         |
| Moderately Slightly or Not influenced        | 4 (10.0)       | 8 (14.3)                     | 11 (12.0)           |         |

**Table S20.** Perceived importance level of environmental factors in causing diseases by education level for the year 2021

|                                                                                  | Non-university | University (Bachelor degree) | Postgraduate or PhD | p-value |
|----------------------------------------------------------------------------------|----------------|------------------------------|---------------------|---------|
| Number of responses                                                              | 40             | 58                           | 103                 |         |
| <b>How important do you think environmental factors are in causing diseases?</b> |                |                              |                     | 0.305   |
| Very important                                                                   | 29 (72.5)      | 43 (74.1)                    | 83 (80.6)           |         |
| Somewhat important                                                               | 7 (17.5)       | 12 (20.7)                    | 18 (17.5)           |         |
| Not too important or Not at all important or Don't know                          | 4 (10.0)       | 3 (5.2)                      | 2 (1.9)             |         |

**Table S21.** Perceived danger level of environmental factors by education level for health for the year 2021

|                                                         | Non-university | University (Bachelor degree) | Postgraduate or PhD | p-value |
|---------------------------------------------------------|----------------|------------------------------|---------------------|---------|
| Number of responses                                     | 40             | 58                           | 103                 |         |
| <b>Air pollution (%)</b>                                |                |                              |                     | 0.920   |
| Very serious danger                                     | 31 (77.5)      | 41 (70.7)                    | 78 (75.7)           |         |
| Somewhat serious danger                                 | 8 (20.0)       | 15 (25.9)                    | 21 (20.4)           |         |
| Somewhat minor danger or No danger at all or Don't know | 1 (2.5)        | 2 (3.4)                      | 4 (3.9)             |         |
| <b>Water pollution (%)</b>                              |                |                              |                     | 0.885   |
| Very serious danger                                     | 26 (65.0)      | 42 (72.4)                    | 75 (72.8)           |         |
| Somewhat serious danger                                 | 12 (30.0)      | 14 (24.1)                    | 23 (22.3)           |         |
| Somewhat minor danger or No danger at all or Don't know | 2 (5.0)        | 2 (3.4)                      | 5 (4.9)             |         |
| <b>Chemicals in water and food (%)</b>                  |                |                              |                     | 0.858   |
| Very serious danger                                     | 30 (75.0)      | 43 (74.1)                    | 83 (80.6)           |         |
| Somewhat serious danger                                 | 8 (20.0)       | 13 (22.4)                    | 17 (16.5)           |         |
| Somewhat minor danger or No danger at all or Don't know | 2 (5.0)        | 2 (3.4)                      | 3 (2.9)             |         |
| <b>(Toxic) waste (%)</b>                                |                |                              |                     | 0.923   |
| Very serious danger                                     | 27 (67.5)      | 41 (70.7)                    | 76 (73.8)           |         |
| Somewhat serious danger                                 | 10 (25.0)      | 12 (20.7)                    | 21 (20.4)           |         |
| Somewhat minor danger or No danger at all or Don't know | 3 (7.5)        | 5 (8.6)                      | 6 (5.8)             |         |
| <b>Heatwave (%)</b>                                     |                |                              |                     | 0.342   |
| Very serious danger                                     | 21 (52.5)      | 21 (36.2)                    | 46 (44.7)           |         |
| Somewhat serious danger                                 | 13 (32.5)      | 24 (41.4)                    | 44 (42.7)           |         |
| Somewhat minor danger or No danger at all or Don't know | 6 (15.0)       | 13 (22.4)                    | 13 (12.6)           |         |

|                                                         | Non-<br>university | University (Bachelor<br>degree) | Postgraduate or<br>PhD | p-<br>value |
|---------------------------------------------------------|--------------------|---------------------------------|------------------------|-------------|
| <b>Flooding (%)</b>                                     |                    |                                 |                        | 0.340       |
| Very serious danger                                     | 18 (45.0)          | 17 (29.3)                       | 29 (28.2)              |             |
| Somewhat serious danger                                 | 12 (30.0)          | 26 (44.8)                       | 43 (41.7)              |             |
| Somewhat minor danger or No danger at all or Don't know | 10 (25.0)          | 15 (25.9)                       | 31 (30.1)              |             |
| <b>Water scarcity (%)</b>                               |                    |                                 |                        | 0.527       |
| Very serious danger                                     | 25 (62.5)          | 26 (44.8)                       | 55 (53.4)              |             |
| Somewhat serious danger                                 | 10 (25.0)          | 23 (39.7)                       | 35 (34.0)              |             |
| Somewhat minor danger or No danger at all or Don't know | 5 (12.5)           | 9 (15.5)                        | 13 (12.6)              |             |
| <b>Agricultural pollution (%)</b>                       |                    |                                 |                        | 0.596       |
| Very serious danger                                     | 21 (52.5)          | 32 (55.2)                       | 66 (64.1)              |             |
| Somewhat serious danger                                 | 16 (40.0)          | 23 (39.7)                       | 30 (29.1)              |             |
| Somewhat minor danger or No danger at all or Don't know | 3 (7.5)            | 3 (5.2)                         | 7 (6.8)                |             |
| <b>Noise pollution (%)</b>                              |                    |                                 |                        | 0.318       |
| Very serious danger                                     | 16 (40.0)          | 13 (22.4)                       | 36 (35.0)              |             |
| Somewhat serious danger                                 | 12 (30.0)          | 25 (43.1)                       | 32 (31.1)              |             |
| Somewhat minor danger or No danger at all or Don't know | 12 (30.0)          | 20 (34.5)                       | 35 (34.0)              |             |
| <b>Consumption habits (%)</b>                           |                    |                                 |                        | 0.147       |
| Very serious danger                                     | 16 (40.0)          | 21 (36.2)                       | 54 (52.4)              |             |
| Somewhat serious danger                                 | 12 (30.0)          | 24 (41.4)                       | 33 (32.0)              |             |
| Somewhat minor danger or No danger at all or Don't know | 12 (30.0)          | 13 (22.4)                       | 16 (15.5)              |             |
| <b>Invasive species (%)</b>                             |                    |                                 |                        | 0.125       |
| Very serious danger                                     | 13 (32.5)          | 12 (20.7)                       | 25 (24.3)              |             |
| Somewhat serious danger                                 | 10 (25.0)          | 29 (50.0)                       | 36 (35.0)              |             |
| Somewhat minor danger or No danger at all or Don't know | 17 (42.5)          | 17 (29.3)                       | 42 (40.8)              |             |
| <b>Exhaustion of natural resources (%)</b>              |                    |                                 |                        | 0.187       |
| Very serious danger                                     | 23 (57.5)          | 26 (44.8)                       | 51 (49.5)              |             |
| Somewhat serious danger                                 | 8 (20.0)           | 24 (41.4)                       | 39 (37.9)              |             |
| Somewhat minor danger or No danger at all or Don't know | 9 (22.5)           | 8 (13.8)                        | 13 (12.6)              |             |
| <b>Biodiversity loss (%)</b>                            |                    |                                 |                        | 0.574       |
| Very serious danger                                     | 21 (52.5)          | 27 (46.6)                       | 48 (46.6)              |             |
| Somewhat serious danger                                 | 10 (25.0)          | 23 (39.7)                       | 38 (36.9)              |             |
| Somewhat minor danger or No danger at all or Don't know | 9 (22.5)           | 8 (13.8)                        | 17 (16.5)              |             |
| <b>Soil degradation (%)</b>                             |                    |                                 |                        | 0.148       |
| Very serious danger                                     | 20 (50.0)          | 20 (34.5)                       | 53 (51.5)              |             |
| Somewhat serious danger                                 | 10 (25.0)          | 26 (44.8)                       | 29 (28.2)              |             |
| Somewhat minor danger or No danger at all or Don't know | 10 (25.0)          | 12 (20.7)                       | 21 (20.4)              |             |

|                                                         | Non-university | University (Bachelor degree) | Postgraduate or PhD | p-value |
|---------------------------------------------------------|----------------|------------------------------|---------------------|---------|
| <b>SARS-CoV-2 (virus causing COVID-19) (%)</b>          |                |                              |                     | 0.031   |
| Very serious danger                                     | 14 (35.0)      | 21 (36.2)                    | 42 (40.8)           |         |
| Somewhat serious danger                                 | 7 (17.5)       | 24 (41.4)                    | 35 (34.0)           |         |
| Somewhat minor danger or No danger at all or Don't know | 19 (47.5)      | 13 (22.4)                    | 26 (25.2)           |         |

**Table S22.** Perceived role of environmental factors in causing illnesses by educational level for the year 2021

|                                                  | Non-university | University (Bachelor degree) | Postgraduate or PhD | p-value |
|--------------------------------------------------|----------------|------------------------------|---------------------|---------|
| Number of responses                              | 40             | 58                           | 103                 |         |
| <b>Cancer in children, such as leukaemia (%)</b> |                |                              |                     | 0.274   |
| Major role                                       | 28 (70.0)      | 40 (69.0)                    | 74 (71.8)           |         |
| Minor role                                       | 5 (12.5)       | 14 (24.1)                    | 21 (20.4)           |         |
| No role at all or Don't know                     | 7 (17.5)       | 4 (6.9)                      | 8 (7.8)             |         |
| <b>Infertility (%)</b>                           |                |                              |                     | 0.316   |
| Major role                                       | 16 (40.0)      | 27 (46.6)                    | 58 (56.3)           |         |
| Minor role                                       | 13 (32.5)      | 21 (36.2)                    | 28 (27.2)           |         |
| No role at all or Don't know                     | 11 (27.5)      | 10 (17.2)                    | 17 (16.5)           |         |
| <b>Asthma in children (%)</b>                    |                |                              |                     | 0.268   |
| Major role                                       | 26 (65.0)      | 40 (69.0)                    | 83 (80.6)           |         |
| Minor role                                       | 10 (25.0)      | 14 (24.1)                    | 16 (15.5)           |         |
| No role at all or Don't know                     | 4 (10.0)       | 4 (6.9)                      | 4 (3.9)             |         |
| <b>Sinus and allergy problems (%)</b>            |                |                              |                     | 0.080   |
| Major role                                       | 33 (82.5)      | 45 (77.6)                    | 94 (91.3)           |         |
| Minor role                                       | 6 (15.0)       | 12 (20.7)                    | 6 (5.8)             |         |
| No role at all or Don't know                     | 1 (2.5)        | 1 (1.7)                      | 3 (2.9)             |         |
| <b>Birth defects (%)</b>                         |                |                              |                     | 0.127   |
| Major role                                       | 16 (40.0)      | 36 (62.1)                    | 52 (50.5)           |         |
| Minor role                                       | 12 (30.0)      | 12 (20.7)                    | 34 (33.0)           |         |
| No role at all or Don't know                     | 12 (30.0)      | 10 (17.2)                    | 17 (16.5)           |         |
| <b>Breast cancer (%)</b>                         |                |                              |                     | 0.079   |
| Major role                                       | 19 (47.5)      | 31 (53.4)                    | 48 (46.6)           |         |
| Minor role                                       | 7 (17.5)       | 17 (29.3)                    | 37 (35.9)           |         |
| No role at all or Don't know                     | 14 (35.0)      | 10 (17.2)                    | 18 (17.5)           |         |
| <b>High blood pressure (%)</b>                   |                |                              |                     | 0.022   |
| Major role                                       | 19 (47.5)      | 19 (32.8)                    | 46 (44.7)           |         |
| Minor role                                       | 9 (22.5)       | 27 (46.6)                    | 45 (43.7)           |         |
| No role at all or Don't know                     | 12 (30.0)      | 12 (20.7)                    | 12 (11.7)           |         |
| <b>Colds and flus (%)</b>                        |                |                              |                     | 0.172   |
| Major role                                       | 14 (35.0)      | 24 (41.4)                    | 47 (45.6)           |         |

|                                                                          | Non-<br>university | University (Bachelor<br>degree) | Postgraduate or<br>PhD | p-<br>value |
|--------------------------------------------------------------------------|--------------------|---------------------------------|------------------------|-------------|
| Minor role                                                               | 15 (37.5)          | 23 (39.7)                       | 45 (43.7)              | 0.478       |
| No role at all or Don't know                                             | 11 (27.5)          | 11 (19.0)                       | 11 (10.7)              |             |
| <b>Prostate cancer (%)</b>                                               |                    |                                 |                        |             |
| Major role                                                               | 15 (37.5)          | 23 (39.7)                       | 44 (42.7)              | 0.163       |
| Minor role                                                               | 12 (30.0)          | 17 (29.3)                       | 38 (36.9)              |             |
| No role at all or Don't know                                             | 13 (32.5)          | 18 (31.0)                       | 21 (20.4)              |             |
| <b>Brain tumours (%)</b>                                                 |                    |                                 |                        | 0.459       |
| Major role                                                               | 20 (50.0)          | 24 (41.4)                       | 49 (47.6)              |             |
| Minor role                                                               | 7 (17.5)           | 20 (34.5)                       | 36 (35.0)              |             |
| No role at all or Don't know                                             | 13 (32.5)          | 14 (24.1)                       | 18 (17.5)              | 0.508       |
| <b>Asthma in adults (%)</b>                                              |                    |                                 |                        |             |
| Major role                                                               | 30 (75.0)          | 40 (69.0)                       | 79 (76.7)              |             |
| Minor role                                                               | 6 (15.0)           | 12 (20.7)                       | 20 (19.4)              | 0.439       |
| No role at all or Don't know                                             | 4 (10.0)           | 6 (10.3)                        | 4 (3.9)                |             |
| <b>Obesity (%)</b>                                                       |                    |                                 |                        |             |
| Major role                                                               | 16 (40.0)          | 23 (39.7)                       | 47 (45.6)              | 0.519       |
| Minor role                                                               | 13 (32.5)          | 21 (36.2)                       | 40 (38.8)              |             |
| No role at all or Don't know                                             | 11 (27.5)          | 14 (24.1)                       | 16 (15.5)              |             |
| <b>Diabetes type 2 (%)</b>                                               |                    |                                 |                        | 0.213       |
| Major role                                                               | 12 (30.0)          | 21 (36.2)                       | 43 (41.7)              |             |
| Minor role                                                               | 14 (35.0)          | 21 (36.2)                       | 39 (37.9)              |             |
| No role at all or Don't know                                             | 14 (35.0)          | 16 (27.6)                       | 21 (20.4)              | 0.584       |
| <b>Thyroid cancer (%)</b>                                                |                    |                                 |                        |             |
| Major role                                                               | 17 (42.5)          | 27 (46.6)                       | 55 (53.4)              |             |
| Minor role                                                               | 11 (27.5)          | 19 (32.8)                       | 30 (29.1)              | 0.119       |
| No role at all or Don't know                                             | 12 (30.0)          | 12 (20.7)                       | 18 (17.5)              |             |
| <b>Vector borne diseases, such as malaria and dengue (%)</b>             |                    |                                 |                        |             |
| Major role                                                               | 17 (42.5)          | 31 (53.4)                       | 64 (62.1)              | 0.994       |
| Minor role                                                               | 15 (37.5)          | 21 (36.2)                       | 28 (27.2)              |             |
| No role at all or Don't know                                             | 8 (20.0)           | 6 (10.3)                        | 11 (10.7)              |             |
| <b>Infectious diseases, such as measles, tuberculosis, hepatitis (%)</b> |                    |                                 |                        | 0.119       |
| Major role                                                               | 14 (35.0)          | 23 (39.7)                       | 40 (38.8)              |             |
| Minor role                                                               | 12 (30.0)          | 22 (37.9)                       | 40 (38.8)              |             |
| No role at all or Don't know                                             | 14 (35.0)          | 13 (22.4)                       | 23 (22.3)              | 0.994       |
| <b>COVID-19 (%)</b>                                                      |                    |                                 |                        |             |
| Major role                                                               | 14 (35.0)          | 22 (37.9)                       | 41 (39.8)              |             |
| Minor role                                                               | 8 (20.0)           | 19 (32.8)                       | 38 (36.9)              | 0.994       |
| No role at all or Don't know                                             | 18 (45.0)          | 17 (29.3)                       | 24 (23.3)              |             |
| <b>Mental health problems such as depression and anxiety (%)</b>         |                    |                                 |                        | 0.994       |
| Major role                                                               | 23 (57.5)          | 36 (62.1)                       | 62 (60.2)              |             |

|                              | Non-university | University (Bachelor degree) | Postgraduate or PhD | p-value |
|------------------------------|----------------|------------------------------|---------------------|---------|
| Minor role                   | 13 (32.5)      | 17 (29.3)                    | 32 (31.1)           |         |
| No role at all or Don't know | 4 (10.0)       | 5 (8.6)                      | 9 (8.7)             |         |

**Table S23.** Perceived amount of action for protection against infectious diseases and health problems caused by environmental problems by education level for the years 2021.

|                                                                                                               | Non-university | University (Bachelor degree) | Postgraduate or PhD | p-value |
|---------------------------------------------------------------------------------------------------------------|----------------|------------------------------|---------------------|---------|
| Number of responses                                                                                           | 40             | 58                           | 103                 |         |
| <b>Infectious diseases such as measles, tuberculosis (%)</b>                                                  |                |                              |                     | 0.640   |
| A great deal                                                                                                  | 18 (45.0)      | 22 (37.9)                    | 52 (50.5)           |         |
| Moderate amount                                                                                               | 14 (35.0)      | 27 (46.6)                    | 40 (38.8)           |         |
| A little                                                                                                      | 6 (15.0)       | 7 (12.1)                     | 9 (8.7)             |         |
| Nothing at all or Don't know                                                                                  | 2 (5.0)        | 2 (3.4)                      | 2 (1.9)             |         |
| <b>Health problems caused by environmental problems such as climate change, pollution or (toxic)waste (%)</b> |                |                              |                     | 0.500   |
| A great deal                                                                                                  | 22 (55.0)      | 27 (46.6)                    | 39 (37.9)           |         |
| Moderate amount                                                                                               | 9 (22.5)       | 15 (25.9)                    | 39 (37.9)           |         |
| A little                                                                                                      | 7 (17.5)       | 13 (22.4)                    | 20 (19.4)           |         |
| Nothing at all or Don't know                                                                                  | 2 (5.0)        | 3 (5.2)                      | 5 (4.9)             |         |

**Table S24.** Perceived evidence of climate change on the planet by age category for the year 2021

|                                                             | 18-34     | 35-54     | >54       | p-value |
|-------------------------------------------------------------|-----------|-----------|-----------|---------|
| Number of responses                                         | 98        | 84        | 19        |         |
| <b>Do you see evidence of climate change on the planet?</b> |           |           |           | 0.387   |
| Extremely                                                   | 48 (49.0) | 39 (46.4) | 11 (57.9) |         |
| Quite a bit                                                 | 29 (29.6) | 32 (38.1) | 7 (36.8)  |         |
| Moderately or Slightly or Not at all                        | 21 (21.4) | 13 (15.5) | 1 (5.3)   |         |

**Table S25.** Perceived frequency of health issues in 10 years as effect of environmental factors by age category for the year 2021

|                                                | 18-34     | 35-54     | >54      | p-value |
|------------------------------------------------|-----------|-----------|----------|---------|
| Number of responses                            | 98        | 84        | 19       |         |
| <b>The amount of people with an injury (%)</b> |           |           |          | 0.520   |
| Much more                                      | 13 (13.3) | 13 (15.5) | 2 (10.5) |         |
| Somewhat more                                  | 38 (38.8) | 23 (27.4) | 8 (42.1) |         |
| About the same or less                         | 47 (48.0) | 48 (57.1) | 9 (47.4) |         |
| <b>The amount of people with asthma (%)</b>    |           |           |          | 0.210   |
| Much more                                      | 41 (41.8) | 45 (53.6) | 9 (47.4) |         |

|                                                             | 18-34     | 35-54     | >54       | p-value |
|-------------------------------------------------------------|-----------|-----------|-----------|---------|
| Somewhat more                                               | 49 (50.0) | 30 (35.7) | 10 (52.6) |         |
| About the same or less                                      | 8 (8.2)   | 9 (10.7)  | 0 (0.0)   |         |
| <b>The amount of people with cancer (%)</b>                 |           |           |           | 0.690   |
| Much more                                                   | 43 (43.9) | 45 (53.6) | 8 (42.1)  |         |
| Somewhat more                                               | 42 (42.9) | 29 (34.5) | 9 (47.4)  |         |
| About the same or less                                      | 13 (13.3) | 10 (11.9) | 2 (10.5)  |         |
| <b>The amount of people with obesity (%)</b>                |           |           |           | 0.664   |
| Much more                                                   | 35 (35.7) | 32 (38.1) | 7 (36.8)  |         |
| Somewhat more                                               | 33 (33.7) | 31 (36.9) | 9 (47.4)  |         |
| About the same or less                                      | 30 (30.6) | 21 (25.0) | 3 (15.8)  |         |
| <b>The amount of people with diabetes type 2 (%)</b>        |           |           |           | 0.464   |
| Much more                                                   | 28 (28.6) | 28 (33.3) | 6 (31.6)  |         |
| Somewhat more                                               | 37 (37.8) | 35 (41.7) | 10 (52.6) |         |
| About the same or less                                      | 33 (33.7) | 21 (25.0) | 3 (15.8)  |         |
| <b>The amount of people with high blood pressure (%)</b>    |           |           |           | 0.194   |
| Much more                                                   | 24 (24.5) | 34 (40.5) | 7 (36.8)  |         |
| Somewhat more                                               | 47 (48.0) | 33 (39.3) | 9 (47.4)  |         |
| About the same or less                                      | 27 (27.6) | 17 (20.2) | 3 (15.8)  |         |
| <b>The amount of people with infectious disease (%)</b>     |           |           |           | 0.555   |
| Much more                                                   | 40 (40.8) | 37 (44.0) | 5 (26.3)  |         |
| Somewhat more                                               | 34 (34.7) | 30 (35.7) | 10 (52.6) |         |
| About the same or less                                      | 24 (24.5) | 17 (20.2) | 4 (21.1)  |         |
| <b>The amount of people with mental health problems (%)</b> |           |           |           | 0.970   |
| Much more                                                   | 54 (55.1) | 44 (52.4) | 10 (52.6) |         |
| Somewhat more                                               | 31 (31.6) | 27 (32.1) | 7 (36.8)  |         |
| About the same or less                                      | 13 (13.3) | 13 (15.5) | 2 (10.5)  |         |

**Table S26.** Perceived degree of how the following factors are being influenced by climate change by age category for the year 2021

|                                              | 18-34     | 35-54     | >54       | p-value |
|----------------------------------------------|-----------|-----------|-----------|---------|
| Number of responses                          | 98        | 84        | 19        |         |
| <b>Temperature rise (global warming) (%)</b> |           |           |           | 0.771   |
| Extremely influenced                         | 74 (80.4) | 60 (75.9) | 12 (70.6) |         |
| Quite a bit influenced                       | 14 (15.2) | 14 (17.7) | 3 (17.6)  |         |
| Moderately Slightly or Not influenced        | 4 (4.3)   | 5 (6.3)   | 2 (11.8)  |         |
| <b>Extreme weather events (%)</b>            |           |           |           | 0.635   |
| Extremely influenced                         | 70 (76.1) | 59 (74.7) | 10 (58.8) |         |
| Quite a bit influenced                       | 17 (18.5) | 14 (17.7) | 5 (29.4)  |         |
| Moderately Slightly or Not influenced        | 5 (5.4)   | 6 (7.6)   | 2 (11.8)  |         |

|                                       | 18-34     | 35-54     | >54       | p-value |
|---------------------------------------|-----------|-----------|-----------|---------|
| <b>Contamination of air (%)</b>       |           |           |           | 0.505   |
| Extremely influenced                  | 64 (69.6) | 51 (64.6) | 10 (58.8) |         |
| Quite a bit influenced                | 18 (19.6) | 16 (20.3) | 6 (35.3)  |         |
| Moderately Slightly or Not influenced | 10 (10.9) | 12 (15.2) | 1 (5.9)   |         |
| <b>Contamination of water (%)</b>     |           |           |           | 0.666   |
| Extremely influenced                  | 51 (55.4) | 45 (57.0) | 9 (52.9)  |         |
| Quite a bit influenced                | 25 (27.2) | 21 (26.6) | 7 (41.2)  |         |
| Moderately Slightly or Not influenced | 16 (17.4) | 13 (16.5) | 1 (5.9)   |         |
| <b>Contamination of food (%)</b>      |           |           |           | 0.101   |
| Extremely influenced                  | 46 (50.0) | 39 (49.4) | 6 (35.3)  |         |
| Quite a bit influenced                | 25 (27.2) | 22 (27.8) | 10 (58.8) |         |
| Moderately Slightly or Not influenced | 21 (22.8) | 18 (22.8) | 1 (5.9)   |         |
| <b>Contamination of land (%)</b>      |           |           |           | 0.309   |
| Extremely influenced                  | 55 (59.8) | 45 (57.0) | 9 (52.9)  |         |
| Quite a bit influenced                | 18 (19.6) | 18 (22.8) | 7 (41.2)  |         |
| Moderately Slightly or Not influenced | 19 (20.7) | 16 (20.3) | 1 (5.9)   |         |
| <b>Radiation level (%)</b>            |           |           |           | 0.735   |
| Extremely influenced                  | 62 (67.4) | 52 (65.8) | 9 (52.9)  |         |
| Quite a bit influenced                | 18 (19.6) | 19 (24.1) | 5 (29.4)  |         |
| Moderately Slightly or Not influenced | 12 (13.0) | 8 (10.1)  | 3 (17.6)  |         |

**Table S27.** Perceived importance level of environmental factors in causing diseases by age category for the years 2021

|                                                                                  | 18-34     | 35-54     | >54       | p-value |
|----------------------------------------------------------------------------------|-----------|-----------|-----------|---------|
| Number of responses                                                              | 98        | 84        | 19        |         |
| <b>How important do you think environmental factors are in causing diseases?</b> |           |           |           | 0.656   |
| Very important                                                                   | 75 (76.5) | 66 (78.6) | 14 (73.7) |         |
| Somewhat important                                                               | 19 (19.4) | 13 (15.5) | 5 (26.3)  |         |
| Not too important or Not at all important or Don't know                          | 4 (4.1)   | 5 (6.0)   | 0 (0.0)   |         |

**Table S28.** Perceived danger level of environmental factors by age category for the year 2021

|                                                         | 18-34     | 35-54     | >54       | p-value |
|---------------------------------------------------------|-----------|-----------|-----------|---------|
| Number of responses                                     | 98        | 84        | 19        |         |
| <b>Air pollution (%)</b>                                |           |           |           | 0.533   |
| Very serious danger                                     | 69 (70.4) | 68 (81.0) | 13 (68.4) |         |
| Somewhat serious danger                                 | 25 (25.5) | 14 (16.7) | 5 (26.3)  |         |
| Somewhat minor danger or No danger at all or Don't know | 4 (4.1)   | 2 (2.4)   | 1 (5.3)   |         |
| <b>Water pollution (%)</b>                              |           |           |           | 0.155   |
| Very serious danger                                     | 70 (71.4) | 62 (73.8) | 11 (57.9) |         |
| Somewhat serious danger                                 | 25 (25.5) | 16 (19.0) | 8 (42.1)  |         |

|                                                         | 18-34     | 35-54     | >54       | p-value |
|---------------------------------------------------------|-----------|-----------|-----------|---------|
| Somewhat minor danger or No danger at all or Don't know | 3 (3.1)   | 6 (7.1)   | 0 (0.0)   | 0.544   |
| <b>Chemicals in water and food (%)</b>                  |           |           |           |         |
| Very serious danger                                     | 73 (74.5) | 70 (83.3) | 13 (68.4) |         |
| Somewhat serious danger                                 | 21 (21.4) | 12 (14.3) | 5 (26.3)  | 0.485   |
| Somewhat minor danger or No danger at all or Don't know | 4 (4.1)   | 2 (2.4)   | 1 (5.3)   |         |
| <b>(Toxic) waste (%)</b>                                |           |           |           |         |
| Very serious danger                                     | 65 (66.3) | 65 (77.4) | 14 (73.7) | 0.262   |
| Somewhat serious danger                                 | 26 (26.5) | 13 (15.5) | 4 (21.1)  |         |
| Somewhat minor danger or No danger at all or Don't know | 7 (7.1)   | 6 (7.1)   | 1 (5.3)   |         |
| <b>Heatwave (%)</b>                                     |           |           |           | 0.991   |
| Very serious danger                                     | 38 (38.8) | 40 (47.6) | 10 (52.6) |         |
| Somewhat serious danger                                 | 45 (45.9) | 32 (38.1) | 4 (21.1)  |         |
| Somewhat minor danger or No danger at all or Don't know | 15 (15.3) | 12 (14.3) | 5 (26.3)  | 0.800   |
| <b>Flooding (%)</b>                                     |           |           |           |         |
| Very serious danger                                     | 32 (32.7) | 26 (31.0) | 6 (31.6)  |         |
| Somewhat serious danger                                 | 40 (40.8) | 34 (40.5) | 7 (36.8)  | 0.388   |
| Somewhat minor danger or No danger at all or Don't know | 26 (26.5) | 24 (28.6) | 6 (31.6)  |         |
| <b>Water scarcity (%)</b>                               |           |           |           |         |
| Very serious danger                                     | 53 (54.1) | 43 (51.2) | 10 (52.6) | 0.390   |
| Somewhat serious danger                                 | 31 (31.6) | 29 (34.5) | 8 (42.1)  |         |
| Somewhat minor danger or No danger at all or Don't know | 14 (14.3) | 12 (14.3) | 1 (5.3)   |         |
| <b>Agricultural pollution (%)</b>                       |           |           |           | 0.108   |
| Very serious danger                                     | 54 (55.1) | 56 (66.7) | 9 (47.4)  |         |
| Somewhat serious danger                                 | 38 (38.8) | 23 (27.4) | 8 (42.1)  |         |
| Somewhat minor danger or No danger at all or Don't know | 6 (6.1)   | 5 (6.0)   | 2 (10.5)  | 0.467   |
| <b>Noise pollution (%)</b>                              |           |           |           |         |
| Very serious danger                                     | 26 (26.5) | 33 (39.3) | 6 (31.6)  |         |
| Somewhat serious danger                                 | 34 (34.7) | 28 (33.3) | 7 (36.8)  | 0.693   |
| Somewhat minor danger or No danger at all or Don't know | 38 (38.8) | 23 (27.4) | 6 (31.6)  |         |
| <b>Consumption habits (%)</b>                           |           |           |           |         |
| Very serious danger                                     | 40 (40.8) | 42 (50.0) | 9 (47.4)  | 0.700   |
| Somewhat serious danger                                 | 33 (33.7) | 32 (38.1) | 4 (21.1)  |         |
| Somewhat minor danger or No danger at all or Don't know | 25 (25.5) | 10 (11.9) | 6 (31.6)  |         |
| <b>Invasive species (%)</b>                             |           |           |           | 0.700   |
| Very serious danger                                     | 21 (21.4) | 25 (29.8) | 4 (21.1)  |         |
| Somewhat serious danger                                 | 36 (36.7) | 33 (39.3) | 6 (31.6)  |         |
| Somewhat minor danger or No danger at all or Don't know | 41 (41.8) | 26 (31.0) | 9 (47.4)  | 0.700   |
| <b>Exhaustion of natural resources (%)</b>              |           |           |           |         |
| Very serious danger                                     | 46 (46.9) | 44 (52.4) | 10 (52.6) |         |
| Somewhat serious danger                                 | 34 (34.7) | 31 (36.9) | 6 (31.6)  | 0.700   |
| Somewhat minor danger or No danger at all or Don't know | 18 (18.4) | 9 (10.7)  | 3 (15.8)  |         |
| <b>Biodiversity loss (%)</b>                            |           |           |           |         |
| Very serious danger                                     | 45 (45.9) | 43 (51.2) | 8 (42.1)  |         |

|                                                         | 18-34     | 35-54     | >54       | p-value |
|---------------------------------------------------------|-----------|-----------|-----------|---------|
| Somewhat serious danger                                 | 38 (38.8) | 27 (32.1) | 6 (31.6)  | 0.196   |
| Somewhat minor danger or No danger at all or Don't know | 15 (15.3) | 14 (16.7) | 5 (26.3)  |         |
| <b>Soil degradation (%)</b>                             |           |           |           |         |
| Very serious danger                                     | 38 (38.8) | 47 (56.0) | 8 (42.1)  | 0.015   |
| Somewhat serious danger                                 | 35 (35.7) | 24 (28.6) | 6 (31.6)  |         |
| Somewhat minor danger or No danger at all or Don't know | 25 (25.5) | 13 (15.5) | 5 (26.3)  |         |
| <b>SARS-CoV-2 (virus causing COVID-19) (%)</b>          |           |           |           |         |
| Very serious danger                                     | 30 (30.6) | 37 (44.0) | 10 (52.6) | 0.015   |
| Somewhat serious danger                                 | 29 (29.6) | 30 (35.7) | 7 (36.8)  |         |
| Somewhat minor danger or No danger at all or Don't know | 39 (39.8) | 17 (20.2) | 2 (10.5)  |         |

**Table S29.** Perceived role of environmental factors in causing illnesses by age category for the year 2021

|                                                 | 18-34     | 35-54     | >54       | P-value |
|-------------------------------------------------|-----------|-----------|-----------|---------|
| Number of responses                             | 98        | 84        | 19        |         |
| <b>Cancer in children, such as leukemia (%)</b> |           |           |           | 0.173   |
| Major role                                      | 63 (64.3) | 66 (78.6) | 13 (68.4) | 0.179   |
| Minor role                                      | 25 (25.5) | 10 (11.9) | 5 (26.3)  |         |
| No role at all or Don't know                    | 10 (10.2) | 8 (9.5)   | 1 (5.3)   |         |
| <b>Infertility (%)</b>                          |           |           |           | 0.179   |
| Major role                                      | 46 (46.9) | 49 (58.3) | 6 (31.6)  | 0.015   |
| Minor role                                      | 30 (30.6) | 23 (27.4) | 9 (47.4)  |         |
| No role at all or Don't know                    | 22 (22.4) | 12 (14.3) | 4 (21.1)  |         |
| <b>Asthma in children (%)</b>                   |           |           |           | 0.015   |
| Major role                                      | 62 (63.3) | 72 (85.7) | 15 (78.9) | 0.748   |
| Minor role                                      | 27 (27.6) | 10 (11.9) | 3 (15.8)  |         |
| No role at all or Don't know                    | 9 (9.2)   | 2 (2.4)   | 1 (5.3)   |         |
| <b>Sinus and allergy problem (%)</b>            |           |           |           | 0.748   |
| Major role                                      | 82 (83.7) | 73 (86.9) | 17 (89.5) | 0.134   |
| Minor role                                      | 14 (14.3) | 8 (9.5)   | 2 (10.5)  |         |
| No role at all or Don't know                    | 2 (2.0)   | 3 (3.6)   | 0 (0.0)   |         |
| <b>Birth defects (%)</b>                        |           |           |           | 0.134   |
| Major role                                      | 52 (53.1) | 46 (54.8) | 6 (31.6)  | 0.202   |
| Minor role                                      | 23 (23.5) | 26 (31.0) | 9 (47.4)  |         |
| No role at all or Don't know                    | 23 (23.5) | 12 (14.3) | 4 (21.1)  |         |
| <b>Breast cancer (%)</b>                        |           |           |           | 0.202   |
| Major role                                      | 42 (42.9) | 47 (56.0) | 9 (47.4)  | 0.297   |
| Minor role                                      | 29 (29.6) | 25 (29.8) | 7 (36.8)  |         |
| No role at all or Don't know                    | 27 (27.6) | 12 (14.3) | 3 (15.8)  |         |
| <b>High blood pressure (%)</b>                  |           |           |           | 0.297   |
| Major role                                      | 36 (36.7) | 40 (47.6) | 8 (42.1)  | 0.297   |
| Minor role                                      | 39 (39.8) | 33 (39.3) | 9 (47.4)  |         |
| No role at all or Don't know                    | 23 (23.5) | 11 (13.1) | 2 (10.5)  |         |

|                                                                          | 18-34     | 35-54     | >54       | P-value |
|--------------------------------------------------------------------------|-----------|-----------|-----------|---------|
| <b>Colds and flus (%)</b>                                                |           |           |           | 0.236   |
| Major role                                                               | 47 (48.0) | 32 (38.1) | 6 (31.6)  |         |
| Minor role                                                               | 34 (34.7) | 41 (48.8) | 8 (42.1)  |         |
| No role at all or Don't know                                             | 17 (17.3) | 11 (13.1) | 5 (26.3)  |         |
| <b>Prostate cancer (%)</b>                                               |           |           |           | 0.115   |
| Major role                                                               | 33 (33.7) | 43 (51.2) | 6 (31.6)  |         |
| Minor role                                                               | 34 (34.7) | 25 (29.8) | 8 (42.1)  |         |
| No role at all or Don't know                                             | 31 (31.6) | 16 (19.0) | 5 (26.3)  |         |
| <b>Brain tumor (%)</b>                                                   |           |           |           | 0.116   |
| Major role                                                               | 37 (37.8) | 48 (57.1) | 8 (42.1)  |         |
| Minor role                                                               | 34 (34.7) | 22 (26.2) | 7 (36.8)  |         |
| No role at all or Don't know                                             | 27 (27.6) | 14 (16.7) | 4 (21.1)  |         |
| <b>Asthma in adults (%)</b>                                              |           |           |           | 0.311   |
| Major role                                                               | 74 (75.5) | 64 (76.2) | 11 (57.9) |         |
| Minor role                                                               | 16 (16.3) | 15 (17.9) | 7 (36.8)  |         |
| No role at all or Don't know                                             | 8 (8.2)   | 5 (6.0)   | 1 (5.3)   |         |
| <b>Obesity (%)</b>                                                       |           |           |           | 0.731   |
| Major role                                                               | 40 (40.8) | 36 (42.9) | 10 (52.6) |         |
| Minor role                                                               | 35 (35.7) | 32 (38.1) | 7 (36.8)  |         |
| No role at all or Don't know                                             | 23 (23.5) | 16 (19.0) | 2 (10.5)  |         |
| <b>Diabetes type 2(%)</b>                                                |           |           |           | 0.197   |
| Major role                                                               | 35 (35.7) | 34 (40.5) | 7 (36.8)  |         |
| Minor role                                                               | 32 (32.7) | 36 (42.9) | 6 (31.6)  |         |
| No role at all or Don't know                                             | 31 (31.6) | 14 (16.7) | 6 (31.6)  |         |
| <b>Thyroid cancer (%)</b>                                                |           |           |           | 0.247   |
| Major role                                                               | 43 (43.9) | 49 (58.3) | 7 (36.8)  |         |
| Minor role                                                               | 31 (31.6) | 22 (26.2) | 7 (36.8)  |         |
| No role at all or Don't know                                             | 24 (24.5) | 13 (15.5) | 5 (26.3)  |         |
| <b>Vector borne diseases, such as malaria and dengue (%)</b>             |           |           |           | 0.305   |
| Major role                                                               | 54 (55.1) | 50 (59.5) | 8 (42.1)  |         |
| Minor role                                                               | 31 (31.6) | 23 (27.4) | 10 (52.6) |         |
| No role at all or Don't know                                             | 13 (13.3) | 11 (13.1) | 1 (5.3)   |         |
| <b>Infectious diseases, such as measles, tuberculosis, hepatitis (%)</b> |           |           |           | 0.465   |
| Major role                                                               | 43 (43.9) | 29 (34.5) | 5 (26.3)  |         |
| Minor role                                                               | 35 (35.7) | 31 (36.9) | 8 (42.1)  |         |
| No role at all or Don't know                                             | 20 (20.4) | 24 (28.6) | 6 (31.6)  |         |
| <b>Covid19 (%)</b>                                                       |           |           |           | 0.342   |
| Major role                                                               | 34 (34.7) | 34 (40.5) | 9 (47.4)  |         |
| Minor role                                                               | 30 (30.6) | 31 (36.9) | 4 (21.1)  |         |
| No role at all or Don't know                                             | 34 (34.7) | 19 (22.6) | 6 (31.6)  |         |
| <b>Mental health problems such as depression and anxiety (%)</b>         |           |           |           | 0.937   |

|                              | 18-34     | 35-54     | >54       | P-value |
|------------------------------|-----------|-----------|-----------|---------|
| Major role                   | 57 (58.2) | 52 (61.9) | 12 (63.2) |         |
| Minor role                   | 33 (33.7) | 24 (28.6) | 5 (26.3)  |         |
| No role at all or Don't know | 8 (8.2)   | 8 (9.5)   | 2 (10.5)  |         |

**Table S30.** Perceived amount of action for protection against infectious diseases and health problems caused by environmental problems by age category for the year 2021.

|                                                                                                               | 18-34     | 35-54     | >54       | p-value |
|---------------------------------------------------------------------------------------------------------------|-----------|-----------|-----------|---------|
| Number of responses                                                                                           | 98        | 84        | 19        |         |
| <b>Infectious diseases such as measles, tuberculosis (%)</b>                                                  |           |           |           | 0.471   |
| A great deal                                                                                                  | 39 (39.8) | 43 (51.2) | 10 (52.6) |         |
| Moderate amount                                                                                               | 41 (41.8) | 33 (39.3) | 7 (36.8)  |         |
| A little                                                                                                      | 13 (13.3) | 7 (8.3)   | 2 (10.5)  |         |
| Nothing at all or Don't know                                                                                  | 5 (5.1)   | 1 (1.2)   | 0 (0.0)   |         |
| <b>Health problems caused by environmental problems such as climate change, pollution or (toxic)waste (%)</b> |           |           |           | 0.162   |
| A great deal                                                                                                  | 52 (53.1) | 29 (34.5) | 7 (36.8)  |         |
| Moderate amount                                                                                               | 25 (25.5) | 32 (38.1) | 6 (31.6)  |         |
| A little                                                                                                      | 16 (16.3) | 18 (21.4) | 6 (31.6)  |         |
| Nothing at all or Don't know                                                                                  | 5 (5.1)   | 5 (6.0)   | 0 (0.0)   |         |

**Table S31.** Perceived evidence of climate change on the planet by education level for the year 2018

|                                                             | Non-university | Postgraduate or PhD | University (Bachelor degree) | p-value |
|-------------------------------------------------------------|----------------|---------------------|------------------------------|---------|
| Number of responses                                         | 33             | 115                 | 37                           |         |
| <b>Do you see evidence of climate change on the planet?</b> |                |                     |                              | 0.906   |
| Extremely                                                   | 13 (39.4)      | 51 (44.3)           | 14 (37.8)                    |         |
| Quite a bit                                                 | 14 (42.4)      | 47 (40.9)           | 18 (48.6)                    |         |
| Moderately or Slightly or Not at all                        | 6 (18.2)       | 17 (14.8)           | 5 (13.5)                     |         |

**Table S32.** Perceived frequency of health issues in 10 years as effect of environmental factors by education level for the year 2018

|                                                | Non-university | Postgraduate or PhD | University (Bachelor degree) | p-value |
|------------------------------------------------|----------------|---------------------|------------------------------|---------|
| Number of responses                            | 33             | 115                 | 37                           |         |
| <b>The amount of people with an injury (%)</b> |                |                     |                              | 0.699   |
| Much more                                      | 4 (12.1)       | 20 (17.4)           | 6 (16.2)                     |         |
| Somewhat more                                  | 16 (48.5)      | 45 (39.1)           | 12 (32.4)                    |         |

|                                                          | Non-university | Postgraduate or PhD | University (Bachelor degree) | p-value |
|----------------------------------------------------------|----------------|---------------------|------------------------------|---------|
| About the same or less                                   | 13 (39.4)      | 50 (43.5)           | 19 (51.4)                    | 0.091   |
| <b>The amount of people with asthma (%)</b>              |                |                     |                              |         |
| Much more                                                | 10 (30.3)      | 63 (54.8)           | 19 (51.4)                    |         |
| Somewhat more                                            | 19 (57.6)      | 42 (36.5)           | 17 (45.9)                    | 0.020   |
| About the same or less                                   | 4 (12.1)       | 10 (8.7)            | 1 (2.7)                      |         |
| <b>The amount of people with cancer (%)</b>              |                |                     |                              |         |
| Much more                                                | 11 (33.3)      | 68 (59.1)           | 23 (62.2)                    | 0.811   |
| Somewhat more                                            | 18 (54.5)      | 39 (33.9)           | 8 (21.6)                     |         |
| About the same or less                                   | 4 (12.1)       | 8 (7.0)             | 6 (16.2)                     |         |
| <b>The amount of people with obesity (%)</b>             |                |                     |                              | 0.154   |
| Much more                                                | 10 (30.3)      | 40 (34.8)           | 10 (27.0)                    |         |
| Somewhat more                                            | 13 (39.4)      | 49 (42.6)           | 16 (43.2)                    |         |
| About the same or less                                   | 10 (30.3)      | 26 (22.6)           | 11 (29.7)                    | 0.177   |
| <b>The amount of people with diabetes type 2 (%)</b>     |                |                     |                              |         |
| Much more                                                | 8 (24.2)       | 38 (33.0)           | 9 (24.3)                     |         |
| Somewhat more                                            | 13 (39.4)      | 54 (47.0)           | 14 (37.8)                    | 0.177   |
| About the same or less                                   | 12 (36.4)      | 23 (20.0)           | 14 (37.8)                    |         |
| <b>The amount of people with high blood pressure (%)</b> |                |                     |                              |         |
| Much more                                                | 9 (27.3)       | 49 (42.6)           | 14 (37.8)                    | 0.837   |
| Somewhat more                                            | 14 (42.4)      | 51 (44.3)           | 15 (40.5)                    |         |
| About the same or less                                   | 10 (30.3)      | 15 (13.0)           | 8 (21.6)                     |         |

**Table S33.** Perceived degree of how the following factors are being influenced by climate change by education level for the year 2018

|                                              | Non-university | Postgraduate or PhD | University (Bachelor degree) | p-value |
|----------------------------------------------|----------------|---------------------|------------------------------|---------|
| Number of responses                          | 33             | 115                 | 37                           | 0.006   |
| <b>Temperature rise (global warming) (%)</b> |                |                     |                              |         |
| Extremely influenced                         | 22 (66.7)      | 95 (82.6)           | 24 (64.9)                    |         |
| Quite a bit influenced                       | 5 (15.2)       | 16 (13.9)           | 11 (29.7)                    | 0.129   |
| Moderately Slightly or Not influenced        | 6 (18.2)       | 4 (3.5)             | 2 (5.4)                      |         |
| <b>Extreme weather events (%)</b>            |                |                     |                              |         |
| Extremely influenced                         | 21 (63.6)      | 89 (77.4)           | 27 (73.0)                    | 0.837   |
| Quite a bit influenced                       | 9 (27.3)       | 22 (19.1)           | 5 (13.5)                     |         |
| Moderately Slightly or Not influenced        | 3 (9.1)        | 4 (3.5)             | 5 (13.5)                     |         |
| <b>Contamination of air (%)</b>              |                |                     |                              |         |

|                                       | Non-university | Postgraduate or PhD | University (Bachelor degree) | p-value |
|---------------------------------------|----------------|---------------------|------------------------------|---------|
| Extremely influenced                  | 20 (60.6)      | 78 (67.8)           | 24 (64.9)                    | 0.794   |
| Quite a bit influenced                | 7 (21.2)       | 24 (20.9)           | 9 (24.3)                     |         |
| Moderately Slightly or Not influenced | 6 (18.2)       | 13 (11.3)           | 4 (10.8)                     |         |
| <b>Contamination of water (%)</b>     |                |                     |                              |         |
| Extremely influenced                  | 16 (48.5)      | 69 (60.0)           | 23 (62.2)                    | 0.423   |
| Quite a bit influenced                | 10 (30.3)      | 27 (23.5)           | 8 (21.6)                     |         |
| Moderately Slightly or Not influenced | 7 (21.2)       | 19 (16.5)           | 6 (16.2)                     |         |
| <b>Contamination of food (%)</b>      |                |                     |                              |         |
| Extremely influenced                  | 13 (39.4)      | 64 (55.7)           | 19 (51.4)                    | 0.389   |
| Quite a bit influenced                | 10 (30.3)      | 32 (27.8)           | 10 (27.0)                    |         |
| Moderately Slightly or Not influenced | 10 (30.3)      | 19 (16.5)           | 8 (21.6)                     |         |
| <b>Contamination of land (%)</b>      |                |                     |                              |         |
| Extremely influenced                  | 14 (42.4)      | 67 (58.3)           | 20 (54.1)                    | 0.324   |
| Quite a bit influenced                | 12 (36.4)      | 26 (22.6)           | 12 (32.4)                    |         |
| Moderately Slightly or Not influenced | 7 (21.2)       | 22 (19.1)           | 5 (13.5)                     |         |
| <b>Radiation level (%)</b>            |                |                     |                              |         |
| Extremely influenced                  | 13 (39.4)      | 69 (60.0)           | 19 (51.4)                    | 0.324   |
| Quite a bit influenced                | 12 (36.4)      | 29 (25.2)           | 11 (29.7)                    |         |
| Moderately Slightly or Not influenced | 8 (24.2)       | 17 (14.8)           | 7 (18.9)                     |         |

**Table S34.** Perceived importance level of environmental factors in causing diseases by education level for the year 2018

|                                                                                  | Non-university | Postgraduate or PhD | University (Bachelor degree) | p-value |
|----------------------------------------------------------------------------------|----------------|---------------------|------------------------------|---------|
| Number of responses                                                              | 33             | 115                 | 37                           | 0.106   |
| <b>How important do you think environmental factors are in causing diseases?</b> |                |                     |                              |         |
| Very important                                                                   | 22 (66.7)      | 98 (85.2)           | 29 (78.4)                    |         |
| Somewhat important                                                               | 8 (24.2)       | 15 (13.0)           | 7 (18.9)                     |         |
| Not too important or Not at all important or Don't know                          | 3 (9.1)        | 2 (1.7)             | 1 (2.7)                      |         |

**Table S35.** Perceived danger level of environmental factors by education level for health for the year 2018

|                                                         | Non-university | Postgraduate or PhD | University (Bachelor degree) | p     |
|---------------------------------------------------------|----------------|---------------------|------------------------------|-------|
| Number of responses                                     | 33             | 115                 | 37                           | 0.659 |
| <b>Air pollution (%)</b>                                |                |                     |                              |       |
| Very serious danger                                     | 25 (75.8)      | 97 (84.3)           | 31 (83.8)                    |       |
| Somewhat serious danger                                 | 7 (21.2)       | 15 (13.0)           | 6 (16.2)                     | 0.025 |
| Somewhat minor danger or No danger at all or Don't know | 1 (3.0)        | 3 (2.6)             | 0 (0.0)                      |       |
| <b>Water pollution (%)</b>                              |                |                     |                              |       |

|                                                            | Non-<br>university | Postgraduate or<br>PhD | University (Bachelor<br>degree) | p     |
|------------------------------------------------------------|--------------------|------------------------|---------------------------------|-------|
| Very serious danger                                        | 21 (63.6)          | 96 (83.5)              | 32 (86.5)                       |       |
| Somewhat serious danger                                    | 10 (30.3)          | 16 (13.9)              | 2 (5.4)                         |       |
| Somewhat minor danger or No danger at all<br>or Don't know | 2 (6.1)            | 3 (2.6)                | 3 (8.1)                         |       |
| <b>Chemicals in water and food (%)</b>                     |                    |                        |                                 | 0.179 |
| Very serious danger                                        | 27 (81.8)          | 100 (87.0)             | 31 (83.8)                       |       |
| Somewhat serious danger                                    | 5 (15.2)           | 14 (12.2)              | 3 (8.1)                         |       |
| Somewhat minor danger or No danger at all<br>or Don't know | 1 (3.0)            | 1 (0.9)                | 3 (8.1)                         |       |
| <b>(toxic) waste (%)</b>                                   |                    |                        |                                 | 0.712 |
| Very serious danger                                        | 27 (81.8)          | 98 (85.2)              | 29 (78.4)                       |       |
| Somewhat serious danger                                    | 5 (15.2)           | 12 (10.4)              | 7 (18.9)                        |       |
| Somewhat minor danger or No danger at<br>all or Don't know | 1 (3.0)            | 5 (4.3)                | 1 (2.7)                         |       |
| <b>Heatwave (%)</b>                                        |                    |                        |                                 | 0.469 |
| Very serious danger                                        | 11 (33.3)          | 48 (41.7)              | 14 (37.8)                       |       |
| Somewhat serious danger                                    | 16 (48.5)          | 53 (46.1)              | 21 (56.8)                       |       |
| Somewhat minor danger or No danger at<br>all or Don't know | 6 (18.2)           | 14 (12.2)              | 2 (5.4)                         |       |
| <b>Flooding (%)</b>                                        |                    |                        |                                 | 0.357 |
| Very serious danger                                        | 6 (18.2)           | 36 (31.3)              | 10 (27.0)                       |       |
| Somewhat serious danger                                    | 18 (54.5)          | 48 (41.7)              | 13 (35.1)                       |       |
| Somewhat minor danger or No danger at<br>all or Don't know | 9 (27.3)           | 31 (27.0)              | 14 (37.8)                       |       |
| <b>Water scarcity (%)</b>                                  |                    |                        |                                 | 0.696 |
| Very serious danger                                        | 18 (54.5)          | 61 (53.0)              | 20 (54.1)                       |       |
| Somewhat serious danger                                    | 13 (39.4)          | 40 (34.8)              | 15 (40.5)                       |       |
| Somewhat minor danger or No danger at<br>all or Don't know | 2 (6.1)            | 14 (12.2)              | 2 (5.4)                         |       |
| <b>Agricultural pollution (%)</b>                          |                    |                        |                                 | 0.793 |
| Very serious danger                                        | 18 (54.5)          | 71 (61.7)              | 23 (62.2)                       |       |
| Somewhat serious danger                                    | 13 (39.4)          | 35 (30.4)              | 10 (27.0)                       |       |
| Somewhat minor danger or No danger at<br>all or Don't know | 2 (6.1)            | 9 (7.8)                | 4 (10.8)                        |       |
| <b>Noise pollution (%)</b>                                 |                    |                        |                                 | 0.306 |
| Very serious danger                                        | 8 (24.2)           | 25 (21.7)              | 12 (32.4)                       |       |
| Somewhat serious danger                                    | 11 (33.3)          | 45 (39.1)              | 17 (45.9)                       |       |
| Somewhat minor danger or No danger at<br>all or Don't know | 14 (42.4)          | 45 (39.1)              | 8 (21.6)                        |       |
| <b>Consumption habits (%)</b>                              |                    |                        |                                 | 0.183 |
| Very serious danger                                        | 14 (42.4)          | 42 (36.5)              | 18 (48.6)                       |       |
| Somewhat serious danger                                    | 8 (24.2)           | 50 (43.5)              | 12 (32.4)                       |       |

|                                                         | Non-university | Postgraduate or PhD | University (Bachelor degree) | p     |
|---------------------------------------------------------|----------------|---------------------|------------------------------|-------|
| Somewhat minor danger or No danger at all or Don't know | 11 (33.3)      | 23 (20.0)           | 7 (18.9)                     |       |
| <b>Invasive species (%)</b>                             |                |                     |                              | 0.396 |
| Very serious danger                                     | 7 (21.2)       | 24 (20.9)           | 6 (16.2)                     |       |
| Somewhat serious danger                                 | 10 (30.3)      | 48 (41.7)           | 11 (29.7)                    |       |
| Somewhat minor danger or No danger at all or Don't know | 16 (48.5)      | 43 (37.4)           | 20 (54.1)                    |       |
| <b>Exhaustion of natural resources (%)</b>              |                |                     |                              | 0.442 |
| Very serious danger                                     | 15 (45.5)      | 65 (56.5)           | 18 (48.6)                    |       |
| Somewhat serious danger                                 | 11 (33.3)      | 39 (33.9)           | 14 (37.8)                    |       |
| Somewhat minor danger or No danger at all or Don't know | 7 (21.2)       | 11 (9.6)            | 5 (13.5)                     |       |
| <b>Biodiversity loss (%)</b>                            |                |                     |                              | 0.536 |
| Very serious danger                                     | 13 (39.4)      | 57 (49.6)           | 17 (45.9)                    |       |
| Somewhat serious danger                                 | 11 (33.3)      | 40 (34.8)           | 11 (29.7)                    |       |
| Somewhat minor danger or No danger at all or Don't know | 9 (27.3)       | 18 (15.7)           | 9 (24.3)                     |       |
| <b>Soil degradation (%)</b>                             |                |                     |                              | 0.909 |
| Very serious danger                                     | 13 (39.4)      | 53 (46.1)           | 16 (43.2)                    |       |
| Somewhat serious danger                                 | 15 (45.5)      | 46 (40.0)           | 14 (37.8)                    |       |
| Somewhat minor danger or No danger at all or Don't know | 5 (15.2)       | 16 (13.9)           | 7 (18.9)                     |       |

**Table S36.** Perceived role of environmental factors in causing illnesses by education level for the year 2018

|                                                | Non-university | University (Bachelor degree) | Postgraduate or PhD | p-value |
|------------------------------------------------|----------------|------------------------------|---------------------|---------|
| Number of responses                            | 33             | 37                           | 115                 |         |
| <b>Cancer in children, such as leukemia(%)</b> |                |                              |                     | 0.453   |
| Major role                                     | 23 (69.7)      | 26 (70.3)                    | 93 (80.9)           |         |
| Minor role                                     | 6 (18.2)       | 5 (13.5)                     | 13 (11.3)           |         |
| No role at all or Don't know                   | 4 (12.1)       | 6 (16.2)                     | 9 (7.8)             |         |
| <b>Infertility (%)</b>                         |                |                              |                     | 0.032   |
| Major role                                     | 12 (36.4)      | 14 (37.8)                    | 67 (58.3)           |         |
| Minor role                                     | 17 (51.5)      | 15 (40.5)                    | 30 (26.1)           |         |
| No role at all or Don't know                   | 4 (12.1)       | 8 (21.6)                     | 18 (15.7)           |         |
| <b>Asthma in children (%)</b>                  |                |                              |                     | 0.104   |
| Major role                                     | 26 (78.8)      | 26 (70.3)                    | 102 (88.7)          |         |
| Minor role                                     | 4 (12.1)       | 7 (18.9)                     | 9 (7.8)             |         |
| No role at all or Don't know                   | 3 (9.1)        | 4 (10.8)                     | 4 (3.5)             |         |
| <b>Sinus and allergy problem (%)</b>           |                |                              |                     | 0.645   |

|                                | Non-<br>university | University (Bachelor<br>degree) | Postgraduate or<br>PhD | p-<br>value |
|--------------------------------|--------------------|---------------------------------|------------------------|-------------|
| Major role                     | 28 (84.8)          | 34 (91.9)                       | 102 (88.7)             | 0.395       |
| Minor role                     | 3 (9.1)            | 3 (8.1)                         | 10 (8.7)               |             |
| No role at all or Don't know   | 2 (6.1)            | 0 (0.0)                         | 3 (2.6)                |             |
| <b>Birth defects (%)</b>       |                    |                                 |                        | 0.395       |
| Major role                     | 15 (45.5)          | 22 (59.5)                       | 61 (53.0)              | 0.406       |
| Minor role                     | 14 (42.4)          | 9 (24.3)                        | 31 (27.0)              |             |
| No role at all or Don't know   | 4 (12.1)           | 6 (16.2)                        | 23 (20.0)              |             |
| <b>Breast cancer (%)</b>       |                    |                                 |                        | 0.406       |
| Major role                     | 18 (54.5)          | 17 (45.9)                       | 68 (59.1)              | 0.451       |
| Minor role                     | 9 (27.3)           | 8 (21.6)                        | 26 (22.6)              |             |
| No role at all or Don't know   | 6 (18.2)           | 12 (32.4)                       | 21 (18.3)              |             |
| <b>High blood pressure (%)</b> |                    |                                 |                        | 0.451       |
| Major role                     | 13 (39.4)          | 17 (45.9)                       | 59 (51.3)              | 0.995       |
| Minor role                     | 16 (48.5)          | 12 (32.4)                       | 38 (33.0)              |             |
| No role at all or Don't know   | 4 (12.1)           | 8 (21.6)                        | 18 (15.7)              |             |
| <b>Colds and flus (%)</b>      |                    |                                 |                        | 0.995       |
| Major role                     | 16 (48.5)          | 18 (48.6)                       | 54 (47.0)              | 0.041       |
| Minor role                     | 12 (36.4)          | 14 (37.8)                       | 46 (40.0)              |             |
| No role at all or Don't know   | 5 (15.2)           | 5 (13.5)                        | 15 (13.0)              |             |
| <b>Prostate cancer (%)</b>     |                    |                                 |                        | 0.041       |
| Major role                     | 14 (42.4)          | 10 (27.0)                       | 55 (47.8)              | 0.363       |
| Minor role                     | 13 (39.4)          | 11 (29.7)                       | 24 (20.9)              |             |
| No role at all or Don't know   | 6 (18.2)           | 16 (43.2)                       | 36 (31.3)              |             |
| <b>Brain tumours (%)</b>       |                    |                                 |                        | 0.363       |
| Major role                     | 19 (57.6)          | 19 (51.4)                       | 67 (58.3)              | 0.427       |
| Minor role                     | 10 (30.3)          | 7 (18.9)                        | 22 (19.1)              |             |
| No role at all or Don't know   | 4 (12.1)           | 11 (29.7)                       | 26 (22.6)              |             |
| <b>Asthma in adults (%)</b>    |                    |                                 |                        | 0.427       |
| Major role                     | 25 (75.8)          | 26 (70.3)                       | 94 (81.7)              | 0.355       |
| Minor role                     | 6 (18.2)           | 6 (16.2)                        | 15 (13.0)              |             |
| No role at all or Don't know   | 2 (6.1)            | 5 (13.5)                        | 6 (5.2)                |             |
| <b>Obesity (%)</b>             |                    |                                 |                        | 0.355       |
| Major role                     | 11 (33.3)          | 14 (37.8)                       | 41 (35.7)              | 0.383       |
| Minor role                     | 15 (45.5)          | 9 (24.3)                        | 44 (38.3)              |             |
| No role at all or Don't know   | 7 (21.2)           | 14 (37.8)                       | 30 (26.1)              |             |
| <b>Diabetes type 2 (%)</b>     |                    |                                 |                        | 0.383       |
| Major role                     | 13 (39.4)          | 11 (29.7)                       | 53 (46.1)              | 0.050       |
| Minor role                     | 11 (33.3)          | 11 (29.7)                       | 32 (27.8)              |             |
| No role at all or Don't know   | 9 (27.3)           | 15 (40.5)                       | 30 (26.1)              |             |
| <b>Thyroid cancer (%)</b>      |                    |                                 |                        | 0.050       |
| Major role                     | 20 (60.6)          | 15 (40.5)                       | 72 (62.6)              | 0.050       |
| Minor role                     | 9 (27.3)           | 12 (32.4)                       | 17 (14.8)              |             |

|                                                                            | Non-university | University (Bachelor degree) | Postgraduate or PhD | p-value |
|----------------------------------------------------------------------------|----------------|------------------------------|---------------------|---------|
| No role at all or Don't know                                               | 4 (12.1)       | 10 (27.0)                    | 26 (22.6)           | 0.886   |
| <b>Vector borne diseases, such as malaria and dengue (%)</b>               |                |                              |                     |         |
| Major role                                                                 | 21 (63.6)      | 21 (56.8)                    | 74 (64.3)           |         |
| Minor role                                                                 | 7 (21.2)       | 11 (29.7)                    | 28 (24.3)           | 0.757   |
| No role at all or Don't know                                               | 5 (15.2)       | 5 (13.5)                     | 13 (11.3)           |         |
| <b>Infectious diseases, such as measles, tuberculosis or hepatitis (%)</b> |                |                              |                     |         |
| Major role                                                                 | 17 (51.5)      | 14 (37.8)                    | 57 (49.6)           | 0.757   |
| Minor role                                                                 | 9 (27.3)       | 12 (32.4)                    | 32 (27.8)           |         |
| No role at all or Don't know                                               | 7 (21.2)       | 11 (29.7)                    | 26 (22.6)           |         |

**Table S37.** Perceived amount of action for protection against infectious diseases and health problems caused by environmental problems by education level for the year 2018

|                                                                                                                | Non-university | University (Bachelor degree) | Postgraduate or PhD | p     |
|----------------------------------------------------------------------------------------------------------------|----------------|------------------------------|---------------------|-------|
| Number of responses                                                                                            | 33             | 37                           | 115                 | 0.091 |
| <b>Infectious diseases such as measles, tuberculosis (%)</b>                                                   |                |                              |                     |       |
| A great deal                                                                                                   | 14 (42.4)      | 12 (32.4)                    | 47 (40.9)           |       |
| Moderate amount                                                                                                | 9 (27.3)       | 13 (35.1)                    | 53 (46.1)           | 0.242 |
| A little                                                                                                       | 5 (15.2)       | 7 (18.9)                     | 9 (7.8)             |       |
| Nothing at all or Don't know                                                                                   | 5 (15.2)       | 5 (13.5)                     | 6 (5.2)             |       |
| <b>Health problems caused by environmental problems such as climate change, pollution or (toxic) waste (%)</b> |                |                              |                     | 0.242 |
| A great deal                                                                                                   | 13 (39.4)      | 15 (40.5)                    | 48 (41.7)           |       |
| Moderate amount                                                                                                | 8 (24.2)       | 9 (24.3)                     | 32 (27.8)           |       |
| A little                                                                                                       | 7 (21.2)       | 13 (35.1)                    | 23 (20.0)           | 0.242 |
| Nothing at all or Don't know                                                                                   | 5 (15.2)       | 0 (0.0)                      | 12 (10.4)           |       |

**Table S38.** Perceived evidence of climate change on the planet by age category for the year 2018

|                                                             | 18-34     | 35-54     | 55+       | p-value |
|-------------------------------------------------------------|-----------|-----------|-----------|---------|
| Number of responses                                         | 69        | 76        | 40        | 0.160   |
| <b>Do you see evidence of climate change on the planet?</b> |           |           |           |         |
| Extremely                                                   | 30 (43.5) | 37 (48.7) | 11 (27.5) |         |
| Moderately or Slightly or Not at all                        | 9 (13.0)  | 13 (17.1) | 6 (15.0)  | 0.160   |
| Quite a bit                                                 | 30 (43.5) | 26 (34.2) | 23 (57.5) |         |

**Table S39.** Perceived frequency of health issues in 10 years as effect of environmental factors by age category for the year 2018

|                                                          | 18-34     | 35-54     | 55+       | p-value |
|----------------------------------------------------------|-----------|-----------|-----------|---------|
| Number of responses                                      | 69        | 76        | 40        |         |
| <b>The amount of people with an injury (%)</b>           |           |           |           | 0.959   |
| Much more                                                | 10 (14.5) | 13 (17.1) | 7 (17.5)  |         |
| Somewhat more                                            | 29 (42.0) | 30 (39.5) | 14 (35.0) |         |
| About the same or less                                   | 30 (43.5) | 33 (43.4) | 19 (47.5) |         |
| <b>The amount of people with asthma (%)</b>              |           |           |           | 0.741   |
| Much more                                                | 36 (52.2) | 40 (52.6) | 16 (40.0) |         |
| Somewhat more                                            | 28 (40.6) | 30 (39.5) | 20 (50.0) |         |
| About the same or less                                   | 5 (7.2)   | 6 (7.9)   | 4 (10.0)  |         |
| <b>The amount of people with cancer (%)</b>              |           |           |           | 0.112   |
| Much more                                                | 42 (60.9) | 45 (59.2) | 15 (37.5) |         |
| Somewhat more                                            | 22 (31.9) | 25 (32.9) | 18 (45.0) |         |
| About the same or less                                   | 5 (7.2)   | 6 (7.9)   | 7 (17.5)  |         |
| <b>The amount of people with obesity (%)</b>             |           |           |           | 0.564   |
| Much more                                                | 20 (29.0) | 29 (38.2) | 11 (27.5) |         |
| Somewhat more                                            | 29 (42.0) | 32 (42.1) | 17 (42.5) |         |
| About the same or less                                   | 20 (29.0) | 15 (19.7) | 12 (30.0) |         |
| <b>The amount of people with diabetes type 2(%)</b>      |           |           |           | 0.134   |
| Much more                                                | 15 (21.7) | 26 (34.2) | 14 (35.0) |         |
| Somewhat more                                            | 32 (46.4) | 36 (47.4) | 13 (32.5) |         |
| About the same or less                                   | 22 (31.9) | 14 (18.4) | 13 (32.5) |         |
| <b>The amount of people with high blood pressure (%)</b> |           |           |           | 0.103   |
| Much more                                                | 22 (31.9) | 35 (46.1) | 15 (37.5) |         |
| Somewhat more                                            | 31 (44.9) | 34 (44.7) | 15 (37.5) |         |
| About the same or less                                   | 16 (23.2) | 7 (9.2)   | 10 (25.0) |         |

**Table S40.** Perceived degree of how the following factors are being influenced by climate change by age category for the year 2018

|                                              | 18-34     | 35-54     | 55+       | p-value |
|----------------------------------------------|-----------|-----------|-----------|---------|
| Number of responses                          | 69        | 76        | 40        |         |
| <b>Temperature rise (global warming) (%)</b> |           |           |           | 0.030   |
| Extremely influenced                         | 55 (79.7) | 60 (78.9) | 26 (65.0) |         |
| Quite a bit influenced                       | 11 (15.9) | 14 (18.4) | 7 (17.5)  |         |
| Moderately Slightly or Not influenced        | 3 (4.3)   | 2 (2.6)   | 7 (17.5)  |         |
| <b>Extreme weather events (%)</b>            |           |           |           | 0.426   |
| Extremely influenced                         | 54 (78.3) | 57 (75.0) | 26 (65.0) |         |
| Quite a bit influenced                       | 12 (17.4) | 15 (19.7) | 9 (22.5)  |         |
| Moderately Slightly or Not influenced        | 3 (4.3)   | 4 (5.3)   | 5 (12.5)  |         |
| <b>Contamination of air (%)</b>              |           |           |           | 0.925   |

|                                       | 18-34     | 35-54     | 55+       | p-value |
|---------------------------------------|-----------|-----------|-----------|---------|
| Extremely influenced                  | 46 (66.7) | 52 (68.4) | 24 (60.0) |         |
| Quite a bit influenced                | 15 (21.7) | 15 (19.7) | 10 (25.0) |         |
| Moderately Slightly or Not influenced | 8 (11.6)  | 9 (11.8)  | 6 (15.0)  |         |
| <b>Contamination of water (%)</b>     |           |           |           | 0.316   |
| Extremely influenced                  | 43 (62.3) | 47 (61.8) | 18 (45.0) |         |
| Quite a bit influenced                | 17 (24.6) | 15 (19.7) | 13 (32.5) |         |
| Moderately Slightly or Not influenced | 9 (13.0)  | 14 (18.4) | 9 (22.5)  |         |
| <b>Contamination of food (%)</b>      |           |           |           | 0.384   |
| Extremely influenced                  | 39 (56.5) | 41 (53.9) | 16 (40.0) |         |
| Quite a bit influenced                | 19 (27.5) | 21 (27.6) | 12 (30.0) |         |
| Moderately Slightly or Not influenced | 11 (15.9) | 14 (18.4) | 12 (30.0) |         |
| <b>Contamination of land (%)</b>      |           |           |           | 0.419   |
| Extremely influenced                  | 41 (59.4) | 43 (56.6) | 17 (42.5) |         |
| Quite a bit influenced                | 15 (21.7) | 20 (26.3) | 15 (37.5) |         |
| Moderately Slightly or Not influenced | 13 (18.8) | 13 (17.1) | 8 (20.0)  |         |
| <b>Radiation level (%)</b>            |           |           |           | 0.016   |
| Extremely influenced                  | 39 (56.5) | 45 (59.2) | 17 (42.5) |         |
| Quite a bit influenced                | 23 (33.3) | 20 (26.3) | 9 (22.5)  |         |
| Moderately Slightly or Not influenced | 7 (10.1)  | 11 (14.5) | 14 (35.0) |         |

**Table S41.** Perceived importance level of environmental factors in causing diseases by age category for the years 2018

|                                                                                  | 18-34     | 35-54     | 55+       | p-value |
|----------------------------------------------------------------------------------|-----------|-----------|-----------|---------|
| Number of responses                                                              | 69        | 76        | 40        |         |
| <b>How important do you think environmental factors are in causing diseases?</b> |           |           |           | 0.096   |
| Very important                                                                   | 56 (81.2) | 64 (84.2) | 29 (72.5) |         |
| Somewhat important                                                               | 12 (17.4) | 11 (14.5) | 7 (17.5)  |         |
| Not too important or Not at all important or Don't know                          | 1 (1.4)   | 1 (1.3)   | 4 (10.0)  |         |

**Table S42.** Perceived danger level of environmental factors for health by age category for the year 2018

|                                                         | 18-34     | 35-54     | 55+       | p-value |
|---------------------------------------------------------|-----------|-----------|-----------|---------|
| Number of responses                                     | 69        | 76        | 40        |         |
| <b>Air pollution (%)</b>                                |           |           |           | 0.078   |
| Very serious danger                                     | 56 (81.2) | 64 (84.2) | 33 (82.5) |         |
| Somewhat serious danger                                 | 13 (18.8) | 11 (14.5) | 4 (10.0)  |         |
| Somewhat minor danger or No danger at all or Don't know | 0 (0.0)   | 1 (1.3)   | 3 (7.5)   |         |
| <b>Water pollution (%)</b>                              |           |           |           | 0.003   |
| Very serious danger                                     | 59 (85.5) | 63 (82.9) | 27 (67.5) |         |
| Somewhat serious danger                                 | 8 (11.6)  | 13 (17.1) | 7 (17.5)  |         |
| Somewhat minor danger or No danger at all or Don't know | 2 (2.9)   | 0 (0.0)   | 6 (15.0)  |         |
| <b>Chemicals in water and food (%)</b>                  |           |           |           | 0.181   |

|                                                         | 18-34     | 35-54     | 55+       | p-value |
|---------------------------------------------------------|-----------|-----------|-----------|---------|
| Very serious danger                                     | 60 (87.0) | 65 (85.5) | 33 (82.5) | 0.001   |
| Somewhat serious danger                                 | 7 (10.1)  | 11 (14.5) | 4 (10.0)  |         |
| Somewhat minor danger or No danger at all or Don't know | 2 (2.9)   | 0 (0.0)   | 3 (7.5)   |         |
| <b>(toxic) waste (%)</b>                                |           |           |           |         |
| Very serious danger                                     | 62 (89.9) | 64 (84.2) | 28 (70.0) | 0.804   |
| Somewhat serious danger                                 | 7 (10.1)  | 11 (14.5) | 6 (15.0)  |         |
| Somewhat minor danger or No danger at all or Don't know | 0 (0.0)   | 1 (1.3)   | 6 (15.0)  |         |
| <b>Heatwave (%)</b>                                     |           |           |           |         |
| Very serious danger                                     | 30 (43.5) | 26 (34.2) | 17 (42.5) | 0.088   |
| Somewhat serious danger                                 | 32 (46.4) | 40 (52.6) | 18 (45.0) |         |
| Somewhat minor danger or No danger at all or Don't know | 7 (10.1)  | 10 (13.2) | 5 (12.5)  |         |
| <b>Flooding (%)</b>                                     |           |           |           |         |
| Very serious danger                                     | 20 (29.0) | 19 (25.0) | 13 (32.5) | 0.127   |
| Somewhat serious danger                                 | 30 (43.5) | 39 (51.3) | 10 (25.0) |         |
| Somewhat minor danger or No danger at all or Don't know | 19 (27.5) | 18 (23.7) | 17 (42.5) |         |
| <b>Water scarcity (%)</b>                               |           |           |           |         |
| Very serious danger                                     | 42 (60.9) | 34 (44.7) | 23 (57.5) | 0.122   |
| Somewhat serious danger                                 | 23 (33.3) | 30 (39.5) | 15 (37.5) |         |
| Somewhat minor danger or No danger at all or Don't know | 4 (5.8)   | 12 (15.8) | 2 (5.0)   |         |
| <b>Agricultural pollution (%)</b>                       |           |           |           |         |
| Very serious danger                                     | 49 (71.0) | 40 (52.6) | 23 (57.5) | 0.181   |
| Somewhat serious danger                                 | 18 (26.1) | 28 (36.8) | 12 (30.0) |         |
| Somewhat minor danger or No danger at all or Don't know | 2 (2.9)   | 8 (10.5)  | 5 (12.5)  |         |
| <b>Noise pollution (%)</b>                              |           |           |           |         |
| Very serious danger                                     | 17 (24.6) | 23 (30.3) | 5 (12.5)  | 0.135   |
| Somewhat serious danger                                 | 24 (34.8) | 28 (36.8) | 21 (52.5) |         |
| Somewhat minor danger or No danger at all or Don't know | 28 (40.6) | 25 (32.9) | 14 (35.0) |         |
| <b>Consumption habits (%)</b>                           |           |           |           |         |
| Very serious danger                                     | 32 (46.4) | 30 (39.5) | 12 (30.0) | 0.211   |
| Somewhat serious danger                                 | 21 (30.4) | 34 (44.7) | 15 (37.5) |         |
| Somewhat minor danger or No danger at all or Don't know | 16 (23.2) | 12 (15.8) | 13 (32.5) |         |
| <b>Invasive species (%)</b>                             |           |           |           |         |
| Very serious danger                                     | 18 (26.1) | 15 (19.7) | 4 (10.0)  | 0.183   |
| Somewhat serious danger                                 | 27 (39.1) | 28 (36.8) | 14 (35.0) |         |
| Somewhat minor danger or No danger at all or Don't know | 24 (34.8) | 33 (43.4) | 22 (55.0) |         |
| <b>Exhaustion of natural resources (%)</b>              |           |           |           |         |
| Very serious danger                                     | 41 (59.4) | 38 (50.0) | 19 (47.5) | 0.001   |
| Somewhat serious danger                                 | 23 (33.3) | 29 (38.2) | 12 (30.0) |         |
| Somewhat minor danger or No danger at all or Don't know | 5 (7.2)   | 9 (11.8)  | 9 (22.5)  |         |
| <b>Biodiversity loss (%)</b>                            |           |           |           |         |
| Very serious danger                                     | 39 (56.5) | 36 (47.4) | 12 (30.0) | 0.044   |
| Somewhat serious danger                                 | 26 (37.7) | 18 (23.7) | 18 (45.0) |         |
| Somewhat minor danger or No danger at all or Don't know | 4 (5.8)   | 22 (28.9) | 10 (25.0) |         |
| <b>Soil degradation (%)</b>                             |           |           |           |         |

|                                                         | 18-34     | 35-54     | 55+       | p-value |
|---------------------------------------------------------|-----------|-----------|-----------|---------|
| Very serious danger                                     | 40 (58.0) | 27 (35.5) | 15 (37.5) |         |
| Somewhat serious danger                                 | 23 (33.3) | 33 (43.4) | 19 (47.5) |         |
| Somewhat minor danger or No danger at all or Don't know | 6 (8.7)   | 16 (21.1) | 6 (15.0)  |         |

**Table S43.** Perceived role of environmental factors in causing illnesses by age category for the years 2018

|                                                 | 18-34     | 35-54     | 55+       | p-value |
|-------------------------------------------------|-----------|-----------|-----------|---------|
| Number of responses                             | 69        | 76        | 40        |         |
| <b>Cancer in children, such as leukemia (%)</b> |           |           |           | 0.354   |
| Major role                                      | 56 (81.2) | 60 (78.9) | 26 (65.0) |         |
| Minor role                                      | 8 (11.6)  | 8 (10.5)  | 8 (20.0)  |         |
| No role at all or Don't know                    | 5 (7.2)   | 8 (10.5)  | 6 (15.0)  |         |
| <b>Infertility (%)</b>                          |           |           |           | 0.274   |
| Major role                                      | 39 (56.5) | 40 (52.6) | 14 (35.0) |         |
| Minor role                                      | 21 (30.4) | 24 (31.6) | 17 (42.5) |         |
| No role at all or Don't know                    | 9 (13.0)  | 12 (15.8) | 9 (22.5)  |         |
| <b>Asthma in children (%)</b>                   |           |           |           | 0.153   |
| Major role                                      | 56 (81.2) | 65 (85.5) | 33 (82.5) |         |
| Minor role                                      | 6 (8.7)   | 7 (9.2)   | 7 (17.5)  |         |
| No role at all or Don't know                    | 7 (10.1)  | 4 (5.3)   | 0 (0.0)   |         |
| <b>Sinus and allergy problem (%)</b>            |           |           |           | 0.763   |
| Major role                                      | 63 (91.3) | 67 (88.2) | 34 (85.0) |         |
| Minor role                                      | 5 (7.2)   | 6 (7.9)   | 5 (12.5)  |         |
| No role at all or Don't know                    | 1 (1.4)   | 3 (3.9)   | 1 (2.5)   |         |
| <b>Birth defects (%)</b>                        |           |           |           | 0.655   |
| Major role                                      | 41 (59.4) | 39 (51.3) | 18 (45.0) |         |
| Minor role                                      | 18 (26.1) | 22 (28.9) | 14 (35.0) |         |
| No role at all or Don't know                    | 10 (14.5) | 15 (19.7) | 8 (20.0)  |         |
| <b>Breast cancer (%)</b>                        |           |           |           | 0.403   |
| Major role                                      | 39 (56.5) | 47 (61.8) | 17 (42.5) |         |
| Minor role                                      | 16 (23.2) | 15 (19.7) | 12 (30.0) |         |
| No role at all or Don't know                    | 14 (20.3) | 14 (18.4) | 11 (27.5) |         |
| <b>High blood pressure (%)</b>                  |           |           |           | 0.275   |
| Major role                                      | 37 (53.6) | 39 (51.3) | 13 (32.5) |         |
| Minor role                                      | 22 (31.9) | 25 (32.9) | 19 (47.5) |         |
| No role at all or Don't know                    | 10 (14.5) | 12 (15.8) | 8 (20.0)  |         |
| <b>Colds and flus (%)</b>                       |           |           |           | 0.052   |
| Major role                                      | 42 (60.9) | 32 (42.1) | 14 (35.0) |         |
| Minor role                                      | 22 (31.9) | 32 (42.1) | 18 (45.0) |         |
| No role at all or Don't know                    | 5 (7.2)   | 12 (15.8) | 8 (20.0)  |         |
| <b>Prostate cancer (%)</b>                      |           |           |           | 0.892   |
| Major role                                      | 30 (43.5) | 31 (40.8) | 18 (45.0) |         |
| Minor role                                      | 19 (27.5) | 21 (27.6) | 8 (20.0)  |         |
| No role at all or Don't know                    | 20 (29.0) | 24 (31.6) | 14 (35.0) |         |

|                                                                            | 18-34     | 35-54     | 55+       | p-value |
|----------------------------------------------------------------------------|-----------|-----------|-----------|---------|
| <b>Brain tumours (%)</b>                                                   |           |           |           | 0.341   |
| Major role                                                                 | 44 (63.8) | 43 (56.6) | 18 (45.0) |         |
| Minor role                                                                 | 13 (18.8) | 17 (22.4) | 9 (22.5)  |         |
| No role at all or Don't know                                               | 12 (17.4) | 16 (21.1) | 13 (32.5) |         |
| <b>Asthma in adults (%)</b>                                                |           |           |           | 0.478   |
| Major role                                                                 | 53 (76.8) | 63 (82.9) | 29 (72.5) |         |
| Minor role                                                                 | 10 (14.5) | 8 (10.5)  | 9 (22.5)  |         |
| No role at all or Don't know                                               | 6 (8.7)   | 5 (6.6)   | 2 (5.0)   |         |
| <b>Obesity (%)</b>                                                         |           |           |           | 0.506   |
| Major role                                                                 | 22 (31.9) | 29 (38.2) | 15 (37.5) |         |
| Minor role                                                                 | 30 (43.5) | 27 (35.5) | 11 (27.5) |         |
| No role at all or Don't know                                               | 17 (24.6) | 20 (26.3) | 14 (35.0) |         |
| <b>Diabetes type 2 (%)</b>                                                 |           |           |           | 0.898   |
| Major role                                                                 | 30 (43.5) | 31 (40.8) | 16 (40.0) |         |
| Minor role                                                                 | 20 (29.0) | 24 (31.6) | 10 (25.0) |         |
| No role at all or Don't know                                               | 19 (27.5) | 21 (27.6) | 14 (35.0) |         |
| <b>Thyroid cancer (%)</b>                                                  |           |           |           | 0.610   |
| Major role                                                                 | 40 (58.0) | 46 (60.5) | 21 (52.5) |         |
| Minor role                                                                 | 17 (24.6) | 12 (15.8) | 9 (22.5)  |         |
| No role at all or Don't know                                               | 12 (17.4) | 18 (23.7) | 10 (25.0) |         |
| <b>Vector borne diseases, such as malaria and dengue (%)</b>               |           |           |           | 0.006   |
| Major role                                                                 | 55 (79.7) | 41 (53.9) | 20 (50.0) |         |
| Minor role                                                                 | 10 (14.5) | 22 (28.9) | 14 (35.0) |         |
| No role at all or Don't know                                               | 4 (5.8)   | 13 (17.1) | 6 (15.0)  |         |
| <b>Infectious diseases, such as measles, tuberculosis or hepatitis (%)</b> |           |           |           | 0.014   |
| Major role                                                                 | 43 (62.3) | 33 (43.4) | 12 (30.0) |         |
| Minor role                                                                 | 16 (23.2) | 21 (27.6) | 16 (40.0) |         |
| No role at all or Don't know                                               | 10 (14.5) | 22 (28.9) | 12 (30.0) |         |

**Table S44.** Perceived amount of action for protection against infectious diseases and health problems caused by environmental problems by age category for the year 2018

|                                                                                                                | 18-34     | 35-54     | 55+       | p-value |
|----------------------------------------------------------------------------------------------------------------|-----------|-----------|-----------|---------|
| Number of responses                                                                                            | 69        | 76        | 40        |         |
| <b>Infectious diseases such as measles, tuberculosis (%)</b>                                                   |           |           |           | 0.439   |
| A great deal                                                                                                   | 22 (31.9) | 30 (39.5) | 21 (52.5) |         |
| Moderate amount                                                                                                | 33 (47.8) | 31 (40.8) | 11 (27.5) |         |
| A little                                                                                                       | 9 (13.0)  | 8 (10.5)  | 4 (10.0)  |         |
| Nothing at all or Don't know                                                                                   | 5 (7.2)   | 7 (9.2)   | 4 (10.0)  |         |
| <b>Health problems caused by environmental problems such as climate change, pollution or (toxic) waste (%)</b> |           |           |           | 0.190   |
| A great deal                                                                                                   | 35 (50.7) | 24 (31.6) | 17 (42.5) |         |
| Moderate amount                                                                                                | 18 (26.1) | 23 (30.3) | 8 (20.0)  |         |

|                              | 18-34     | 35-54     | 55+      | p-value |
|------------------------------|-----------|-----------|----------|---------|
| A little                     | 12 (17.4) | 22 (28.9) | 9 (22.5) |         |
| Nothing at all or Don't know | 4 (5.8)   | 7 (9.2)   | 6 (15.0) |         |

### Details on the development of the survey questionnaire and analysis

The surveys questionnaires used developed based on the following three previously validated tools:

1. The Short-Form (SF) 36 Health Survey [34]: We used seven out of the eight concepts/scales of the survey (physical functioning, role limitations due to physical health problems, role limitations due to emotional problems, social functioning, energy/fatigue, emotional well-being and general health perceptions), to describe the self-assessed health status of the participants and the question on perceived change in health. The range of the scores for these scales is by 0 and 100, with a higher score indicating a more favourable health state for all scales, except the health change scale. The health change scale, which is comprised of only one item, shows the perceived difference by the current health status and the health status one year before, with a higher score indicating that the current health status is perceived as better compared to the previous year's health status.
2. The European Survey on Public Perceptions of Environmental Health [35]: We formulated questions based on the quantitative results of this survey using Likert-scale questions.
3. The National (USA) Survey of Public Perceptions of Environmental Health Risks [36] after adjusting the publicly available questions of this survey to the specific context of our study.

The original English questionnaire of 2018 was translated to Greek. The Greek version was subsequently translated back to the original language by a different person. The back translation was then compared with the original English version to identify potential discrepancies. The pilot version of the questionnaire, in both languages, was tested and based on comments and time needed to complete the questionnaire, questions were adjusted. This process was repeated twice before finalizing the questionnaire.

The 2021 questionnaire is the same as the 2018 survey with minor modifications. Specifically, the 2021 questionnaire has additional categories in some questions regarding COVID-19 and mental health. Before dissemination of the final questionnaire, adjustments were made based on the piloting of the questionnaire.

Between- and within-survey associations were examined among environment and health risk perceptions and stratified by sociodemographics (age, sex, educational level) using chi-square tests. One of the chi-square test assumptions is that the expected value of cell counts should be  $\geq 5$  in at least 80% of cells. The assumption was satisfied by re-grouping categories of some variables (Table S1).

## CHERRIES Checklist

| <b>Checklist Item</b>                    | <b>Explanation</b>                                                                                                                                                                                                                                                                                                                                                                                                                           | <b>Section in which the information is reported in the manuscript</b> |
|------------------------------------------|----------------------------------------------------------------------------------------------------------------------------------------------------------------------------------------------------------------------------------------------------------------------------------------------------------------------------------------------------------------------------------------------------------------------------------------------|-----------------------------------------------------------------------|
| Describe survey design                   | Describe target population, sample frame. Is the sample a convenience sample? (In “open” surveys this is most likely.)                                                                                                                                                                                                                                                                                                                       | Methods                                                               |
| IRB approval                             | Mention whether the study has been approved by an IRB.                                                                                                                                                                                                                                                                                                                                                                                       | Methods                                                               |
| Informed consent                         | Describe the informed consent process. Where were the participants told the length of time of the survey, which data were stored and where and for how long, who the investigator was, and the purpose of the study?                                                                                                                                                                                                                         | Methods                                                               |
| Data protection                          | If any personal information was collected or stored, describe what mechanisms were used to protect unauthorized access.                                                                                                                                                                                                                                                                                                                      | Methods                                                               |
| Development and testing                  | State how the survey was developed, including whether the usability and technical functionality of the electronic questionnaire had been tested before fielding the questionnaire.                                                                                                                                                                                                                                                           | Methods                                                               |
| Open survey versus closed survey         | An “open survey” is a survey open for each visitor of a site, while a closed survey is only open to a sample which the investigator knows (password-protected survey).                                                                                                                                                                                                                                                                       | Methods                                                               |
| Contact mode                             | Indicate whether or not the initial contact with the potential participants was made on the Internet. (Investigators may also send out questionnaires by mail and allow for Web-based data entry.)                                                                                                                                                                                                                                           | Methods                                                               |
| Advertising the survey                   | How/where was the survey announced or advertised? Some examples are offline media (newspapers), or online (mailing lists – If yes, which ones?) or banner ads (Where were these banner ads posted and what did they look like?). It is important to know the wording of the announcement as it will heavily influence who chooses to participate. Ideally the survey announcement should be published as an appendix.                        | Methods                                                               |
| Web/E-mail                               | State the type of e-survey (eg, one posted on a Web site, or one sent out through e-mail). If it is an e-mail survey, were the responses entered manually into a database, or was there an automatic method for capturing responses?                                                                                                                                                                                                         | Methods                                                               |
| Context                                  | Describe the Web site (for mailing list/newsgroup) in which the survey was posted. What is the Web site about, who is visiting it, what are visitors normally looking for? Discuss to what degree the content of the Web site could pre-select the sample or influence the results. For example, a survey about vaccination on a anti-immunization Web site will have different results from a Web survey conducted on a government Web site | Methods                                                               |
| Mandatory/voluntary                      | Was it a mandatory survey to be filled in by every visitor who wanted to enter the Web site, or was it a voluntary survey?                                                                                                                                                                                                                                                                                                                   | Methods                                                               |
| Incentives                               | Were any incentives offered (eg, monetary, prizes, or non-monetary incentives such as an offer to provide the survey results)?                                                                                                                                                                                                                                                                                                               | Not applicable                                                        |
| Time/Date                                | In what timeframe were the data collected?                                                                                                                                                                                                                                                                                                                                                                                                   | Methods                                                               |
| Randomization of items or questionnaires | To prevent biases items can be randomized or alternated.                                                                                                                                                                                                                                                                                                                                                                                     | Not applicable                                                        |
| Adaptive questioning                     | Use adaptive questioning (certain items, or only conditionally displayed based on responses to other items) to reduce number and complexity of the questions.                                                                                                                                                                                                                                                                                | Not applicable                                                        |
| Number of Items                          | What was the number of questionnaire items per page? The number of items is an important factor for the completion rate.                                                                                                                                                                                                                                                                                                                     | Supplementary material                                                |

|                                                                                                           |                                                                                                                                                                                                                                                                                                                                                                                                                                                                                                                                                                            |                             |
|-----------------------------------------------------------------------------------------------------------|----------------------------------------------------------------------------------------------------------------------------------------------------------------------------------------------------------------------------------------------------------------------------------------------------------------------------------------------------------------------------------------------------------------------------------------------------------------------------------------------------------------------------------------------------------------------------|-----------------------------|
| Number of screens (pages)                                                                                 | Over how many pages was the questionnaire distributed? The number of items is an important factor for the completion rate.                                                                                                                                                                                                                                                                                                                                                                                                                                                 | Supplementary material      |
| Completeness check                                                                                        | It is technically possible to do consistency or completeness checks before the questionnaire is submitted. Was this done, and if “yes”, how (usually JavaScript)? An alternative is to check for completeness after the questionnaire has been submitted (and highlight mandatory items). If this has been done, it should be reported. All items should provide a non-response option such as “not applicable” or “rather not say”, and selection of one response option should be enforced.                                                                              | Not applicable              |
| Review step                                                                                               | State whether respondents were able to review and change their answers (eg, through a Back button or a Review step which displays a summary of the responses and asks the respondents if they are correct).                                                                                                                                                                                                                                                                                                                                                                | Not applicable              |
| Unique site visitor                                                                                       | If you provide view rates or participation rates, you need to define how you determined a unique visitor. There are different techniques available, based on IP addresses or cookies or both.                                                                                                                                                                                                                                                                                                                                                                              | Not available               |
| View rate (Ratio of unique survey visitors/unique site visitors)                                          | Requires counting unique visitors to the first page of the survey, divided by the number of unique site visitors (not page views!). It is not unusual to have view rates of less than 0.1 % if the survey is voluntary.                                                                                                                                                                                                                                                                                                                                                    | Not available               |
| Participation rate (Ratio of unique visitors who agreed to participate/unique first survey page visitors) | Count the unique number of people who filled in the first survey page (or agreed to participate, for example by checking a checkbox), divided by visitors who visit the first page of the survey (or the informed consents page, if present). This can also be called “recruitment” rate.                                                                                                                                                                                                                                                                                  | Results                     |
| Completion rate (Ratio of users who finished the survey/users who agreed to participate)                  | The number of people submitting the last questionnaire page, divided by the number of people who agreed to participate (or submitted the first survey page). This is only relevant if there is a separate “informed consent” page or if the survey goes over several pages. This is a measure for attrition. Note that “completion” can involve leaving questionnaire items blank. This is not a measure for how completely questionnaires were filled in. (If you need a measure for this, use the word “completeness rate”.)                                             | Not explored                |
| Cookies used                                                                                              | Indicate whether cookies were used to assign a unique user identifier to each client computer. If so, mention the page on which the cookie was set and read, and how long the cookie was valid. Were duplicate entries avoided by preventing users access to the survey twice; or were duplicate database entries having the same user ID eliminated before analysis? In the latter case, which entries were kept for analysis (eg, the first entry or the most recent)?                                                                                                   | Platform defaults were used |
| IP check                                                                                                  | Indicate whether the IP address of the client computer was used to identify potential duplicate entries from the same user. If so, mention the period of time for which no two entries from the same IP address were allowed (eg, 24 hours). Were duplicate entries avoided by preventing users with the same IP address access to the survey twice; or were duplicate database entries having the same IP address within a given period of time eliminated before analysis? If the latter, which entries were kept for analysis (eg, the first entry or the most recent)? | Not performed               |
| Log file analysis                                                                                         | Indicate whether other techniques to analyze the log file for identification of multiple entries were used. If so, please describe.                                                                                                                                                                                                                                                                                                                                                                                                                                        | Not performed               |
| Registration                                                                                              | In “closed” (non-open) surveys, users need to login first and it is easier to prevent duplicate entries from the same user. Describe how this was done. For example, was the survey never displayed a second time once the user had filled it in, or was the username stored together with the                                                                                                                                                                                                                                                                             | Not applicable              |

|                                                     |                                                                                                                                                                                                                                              |                |
|-----------------------------------------------------|----------------------------------------------------------------------------------------------------------------------------------------------------------------------------------------------------------------------------------------------|----------------|
|                                                     | survey results and later eliminated? If the latter, which entries were kept for analysis (eg, the first entry or the most recent)?                                                                                                           |                |
| Handling of incomplete questionnaires               | Were only completed questionnaires analyzed? Were questionnaires which terminated early (where, for example, users did not go through all questionnaire pages) also analyzed?                                                                | Excluded       |
| Questionnaires submitted with an atypical timestamp | Some investigators may measure the time people needed to fill in a questionnaire and exclude questionnaires that were submitted too soon. Specify the timeframe that was used as a cut-off point and describe how this point was determined. | Not explored   |
| Statistical correction                              | Indicate whether any methods such as weighting of items or propensity scores have been used to adjust for the non-representative sample; if so, please describe the methods.                                                                 | Not applicable |
